# Supplementary material for: Metformin May Alter the Metabolic Reprogramming in Cancer Cells by Disrupting the L-Arginine Metabolism: A Preliminary Computational Study
Source: MDPI journal article supplement (doi:10.3390/ijms24065316), 2023-03-10
Supplement: s1 [file s1]

**Metformin may alter the metabolic reprogramming in cancer cells by disrupting the L-arginine metabolism: A preliminary computational study**

Bryan Alejandro Espinosa-Rodriguez <sup>1</sup>, Daniela Treviño-Almaguer <sup>1</sup>, Pilar Carranza-Rosales <sup>2</sup>, Monica Azucena Ramirez-Cabrera <sup>1</sup>, Karla Ramirez-Estrada <sup>1</sup>, Eder Ubaldo Arredondo-Espinoza <sup>1</sup>, Luis Fernando Mendez-Lopez <sup>3,\*</sup>, and Isaias Balderas-Renteria <sup>1,\*</sup>

*Authors affiliation:*

<sup>1</sup> Universidad Autonoma de Nuevo Leon, School of Chemistry, Laboratory of Molecular Pharmacology and Biological Models, San Nicolas de los Garza, Nuevo Leon, 66451, Mexico

<sup>2</sup> Centro de Investigacion Biomedica del Noreste, Laboratory of Cell Biology, Instituto Mexicano del Seguro Social, Monterrey, Nuevo Leon, 66720, Mexico

<sup>3</sup> Universidad Autonoma de Nuevo Leon, School of Public Health and Nutrition, Center for Research on Nutrition and Public Health, Monterrey, Nuevo Leon, 66460, Mexico

\*Correspondence: I.B.R.: isaias.balderasn@uanl.edu.mx, ibalderas@hotmail.com; Tel.: +52 81-8329-4000. L.F.M.L.: luis.mendezlop@uanl.edu.mx; Tel: +52 81-1042-2622.

### Complementary results of the structural comparison at the 2D and 3D levels

The complete results of both 2D and 3D structural comparisons between biguanides and the candidate metabolites can be observed in Supplementary Material part B, including the different TC, ST, CT, and combo T values.

### Complementary results of the physicochemical comparison

The complete list of physicochemical parameters employed in the physicochemical comparisons between biguanides and the candidate metabolites can be observed in Supplementary Material part B, including the molecular weight, consensus log P, topological polar surface area, hydrogen bond donors, hydrogen bond acceptors, Csp<sup>3</sup> fraction, and rotatable bonds.

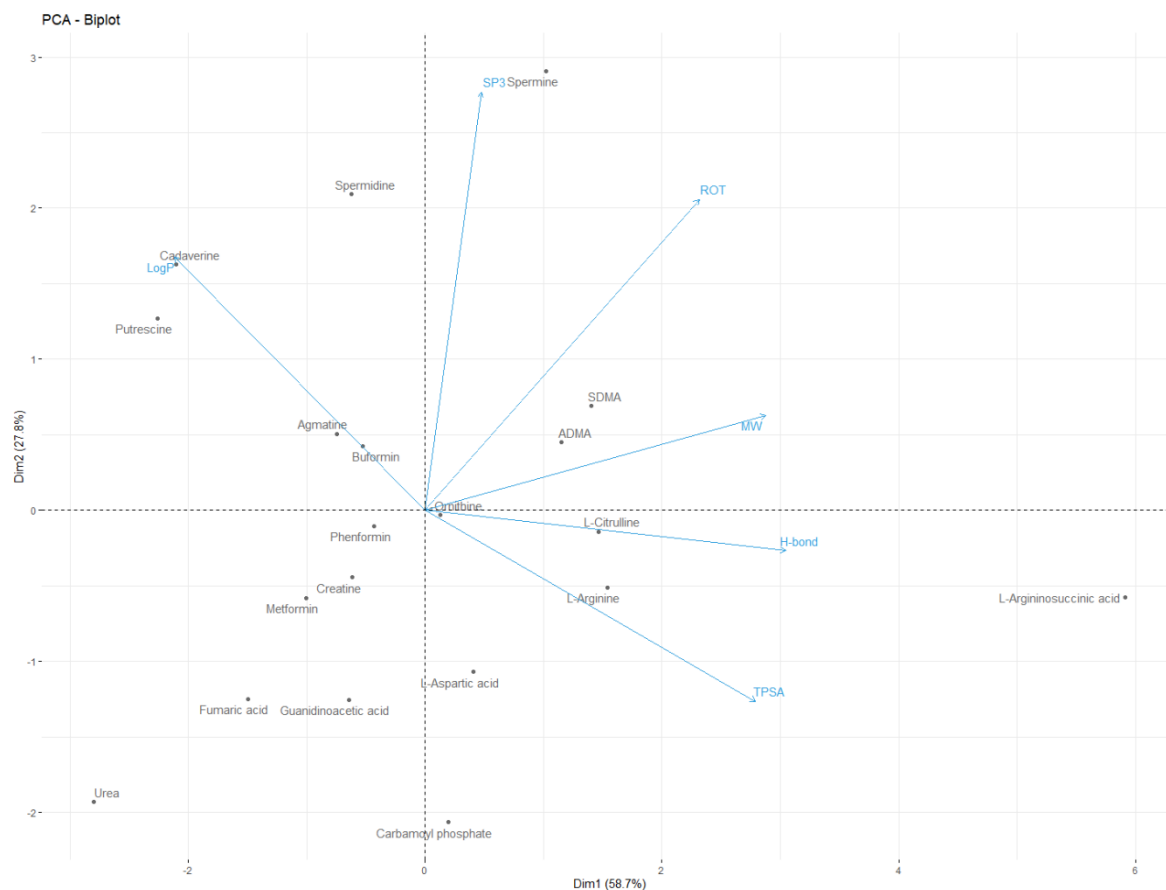

**Figure S1.** Principal component analysis of biguanides and candidate metabolites in the non-ionized modality

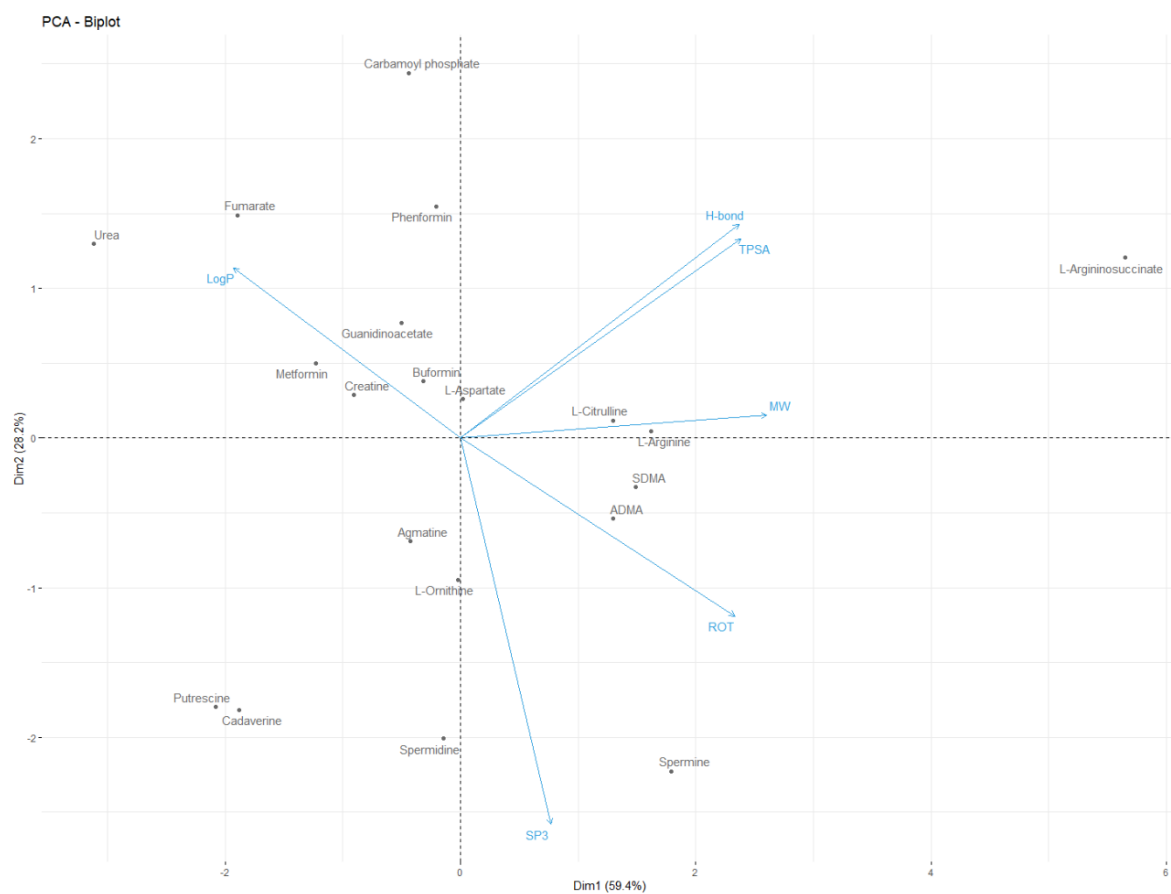

**Figure S2.** Principal component analysis of biguanides and candidate metabolites in the ionized modality

Dendrogram

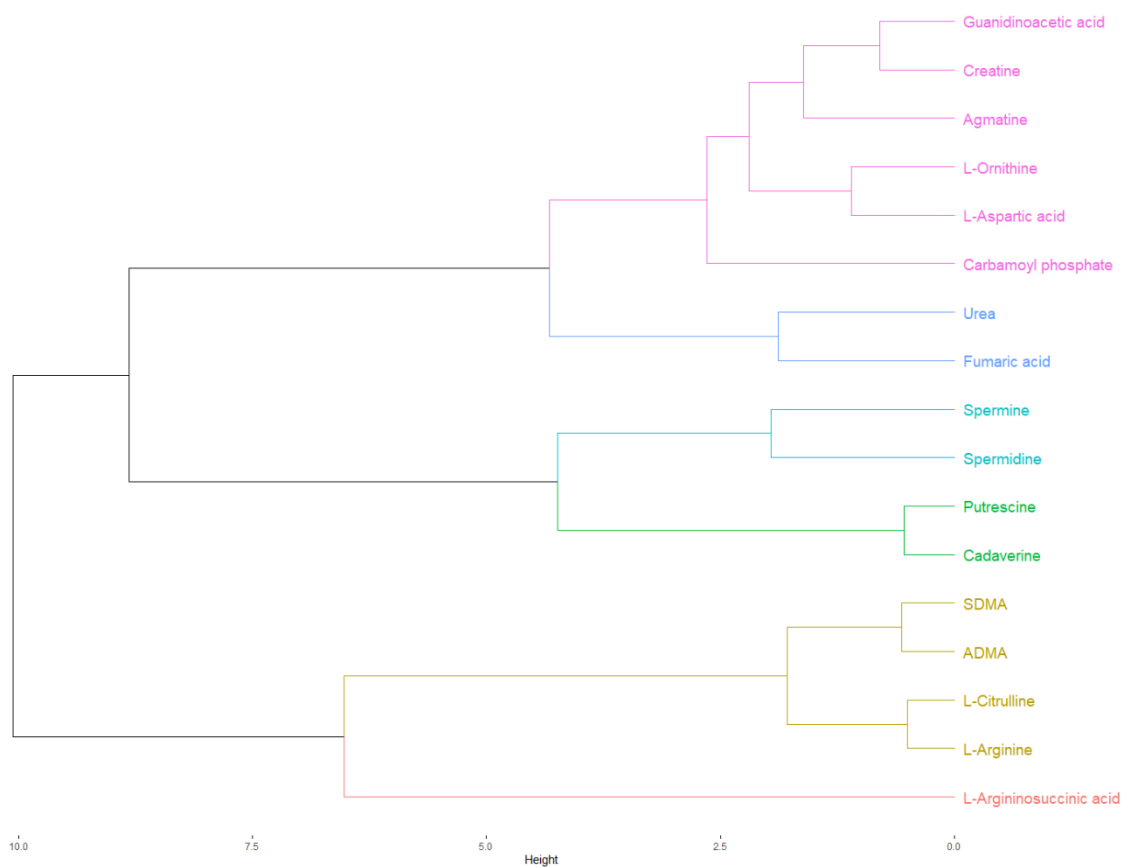

**Figure S3.** Hierarchical clustering of candidate metabolites in the non-ionized modality

Dendrogram

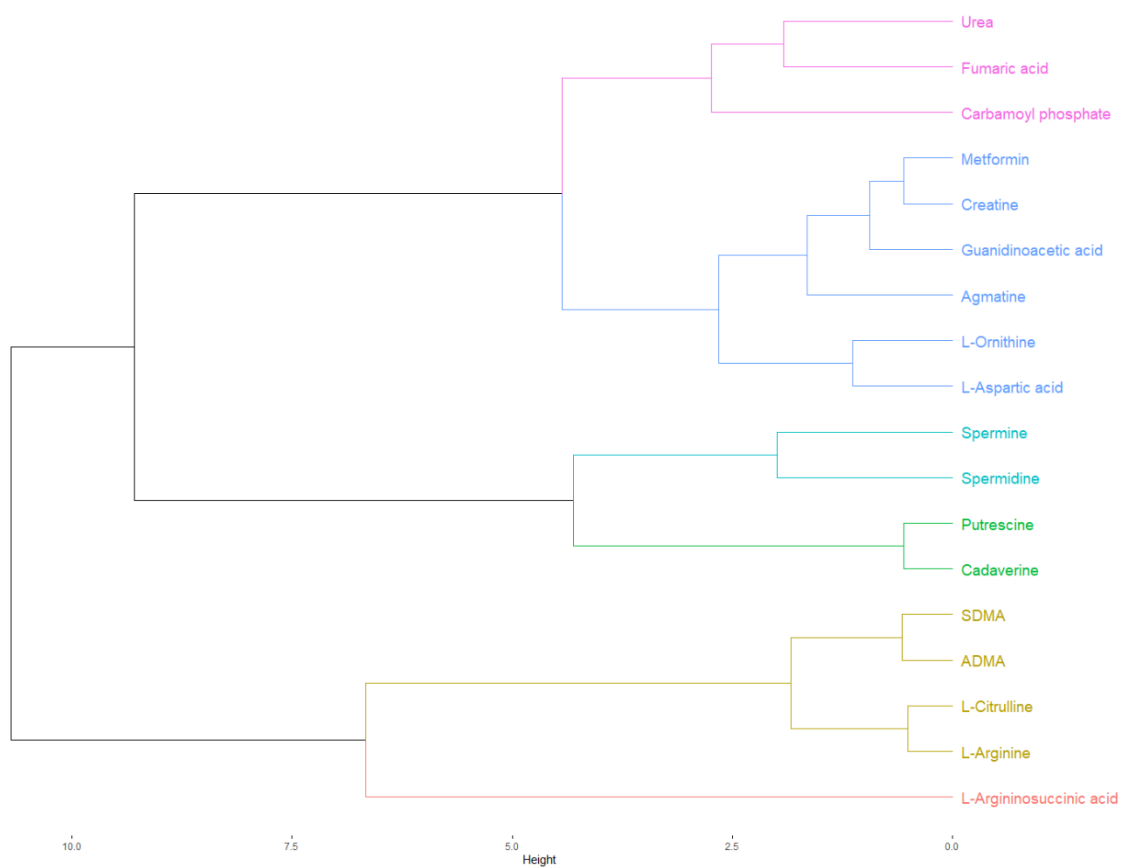

**Figure S4.** Hierarchical clustering of metformin and candidate metabolites in the non-ionized modality

Dendrogram

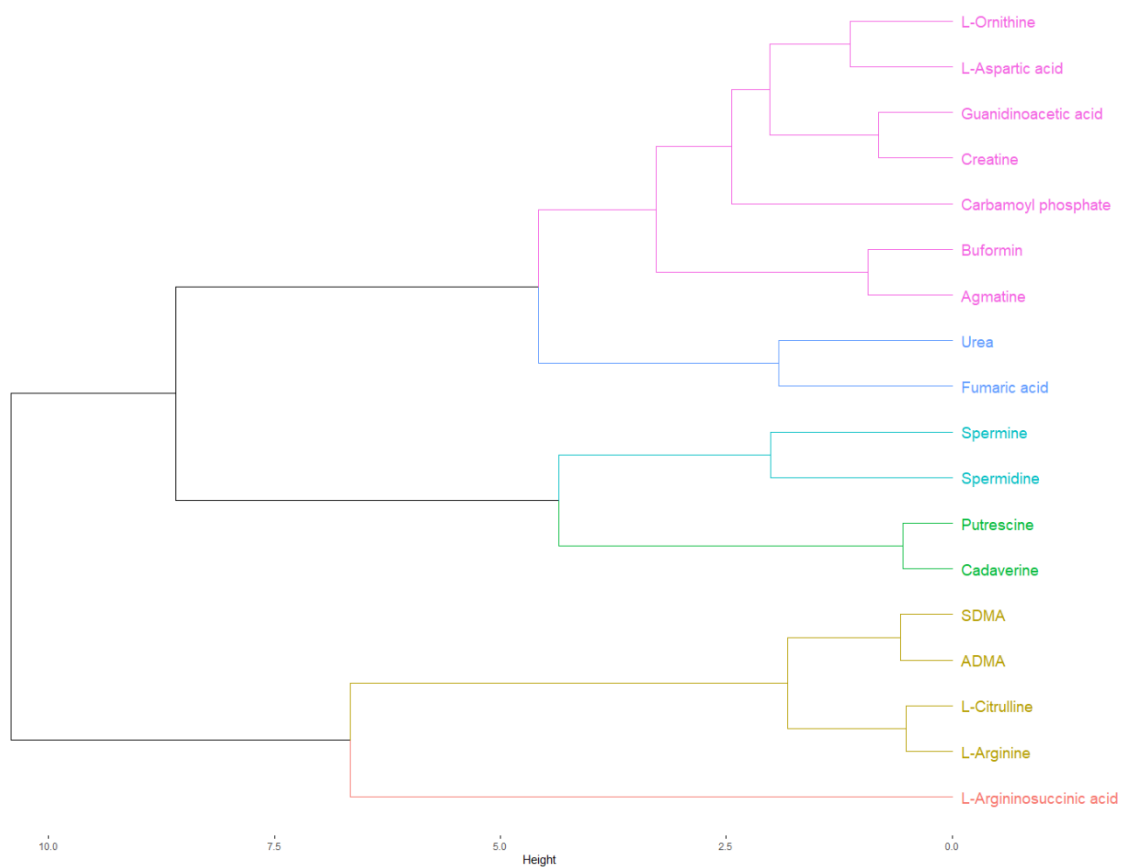

**Figure S5.** Hierarchical clustering of buformin and candidate metabolites in the non-ionized modality.

Dendrogram

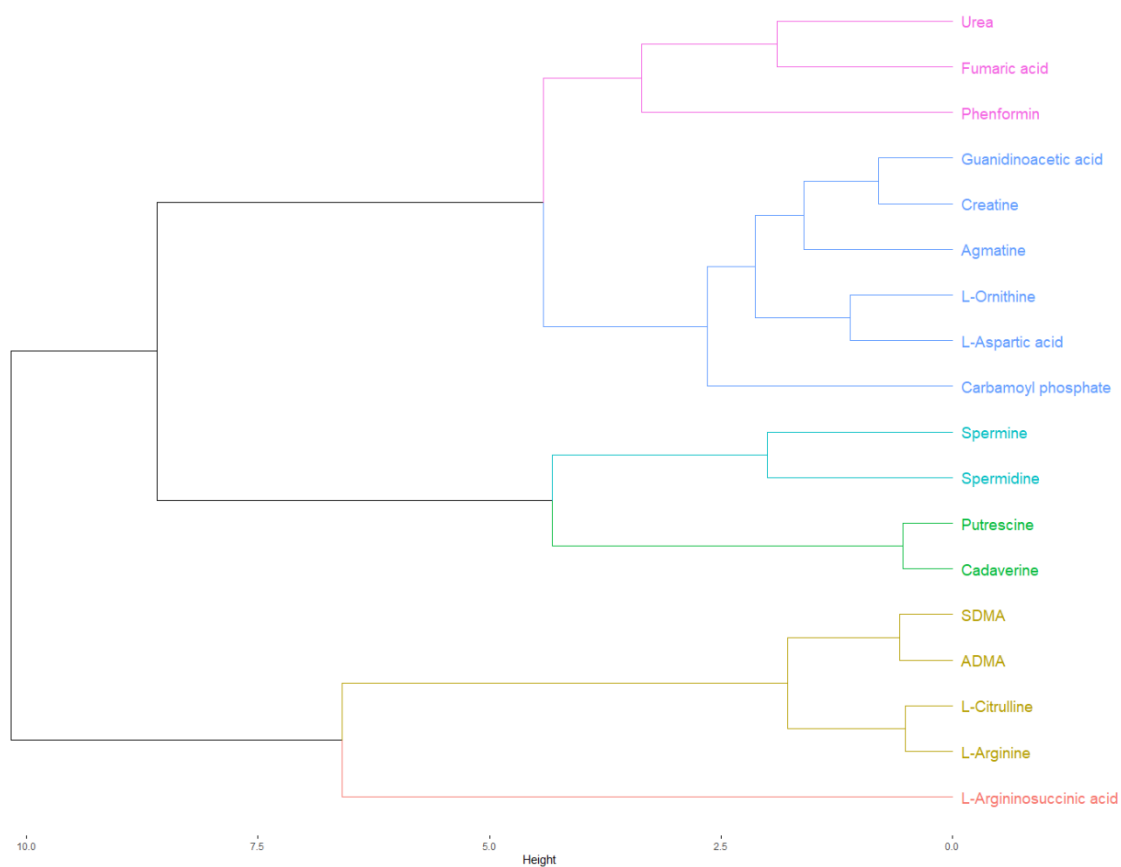

**Figure S6.** Hierarchical clustering of phenformin and candidate metabolites in the non-ionized modality.

Dendrogram

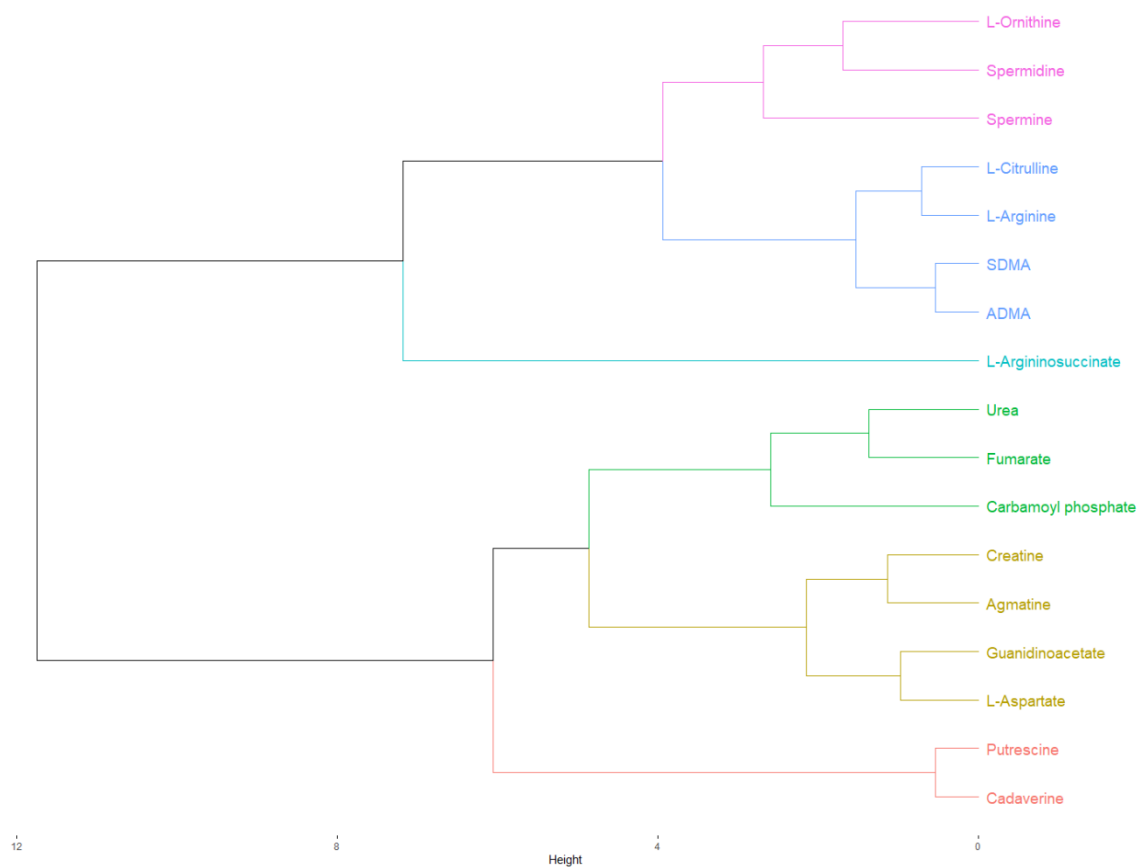

**Figure S7.** Hierarchical clustering of candidate metabolites in the ionized modality.



Dendrogram

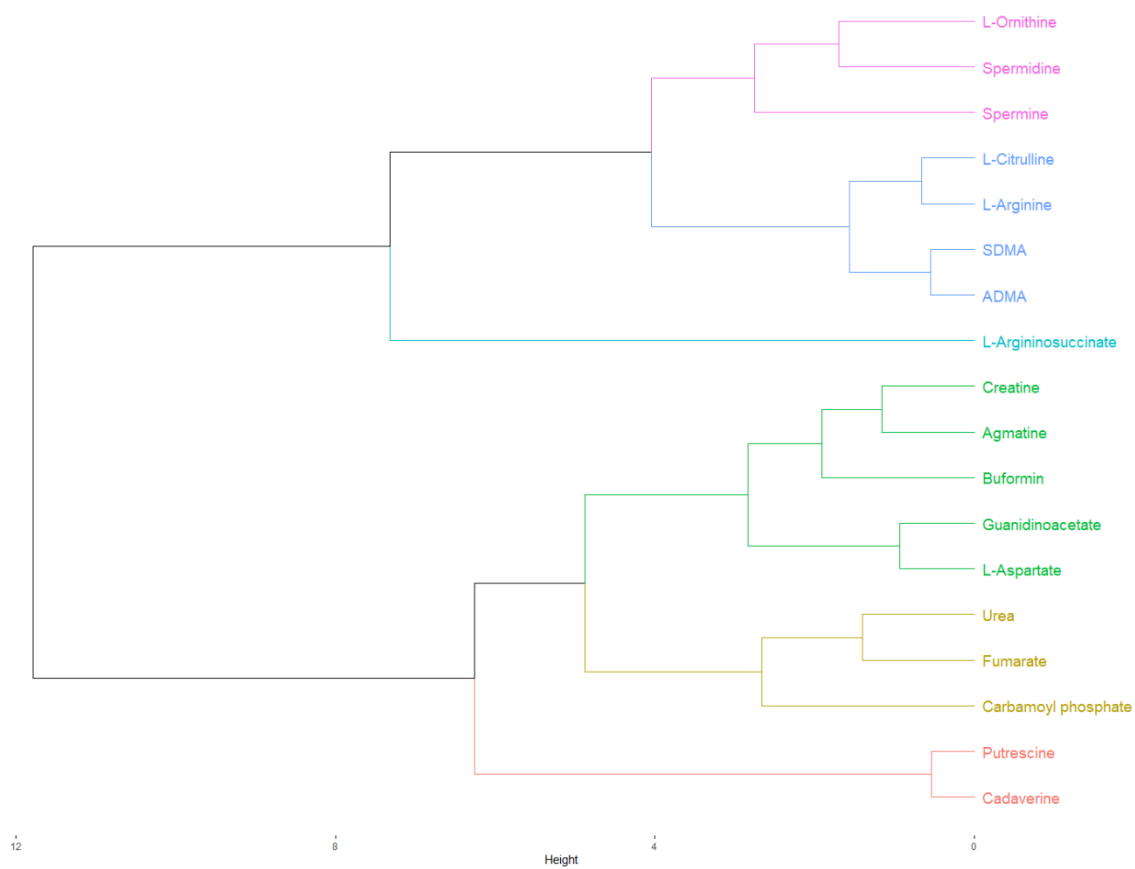

**Figure S8.** Hierarchical clustering of buformin and candidate metabolites in the ionized modality.

Dendrogram

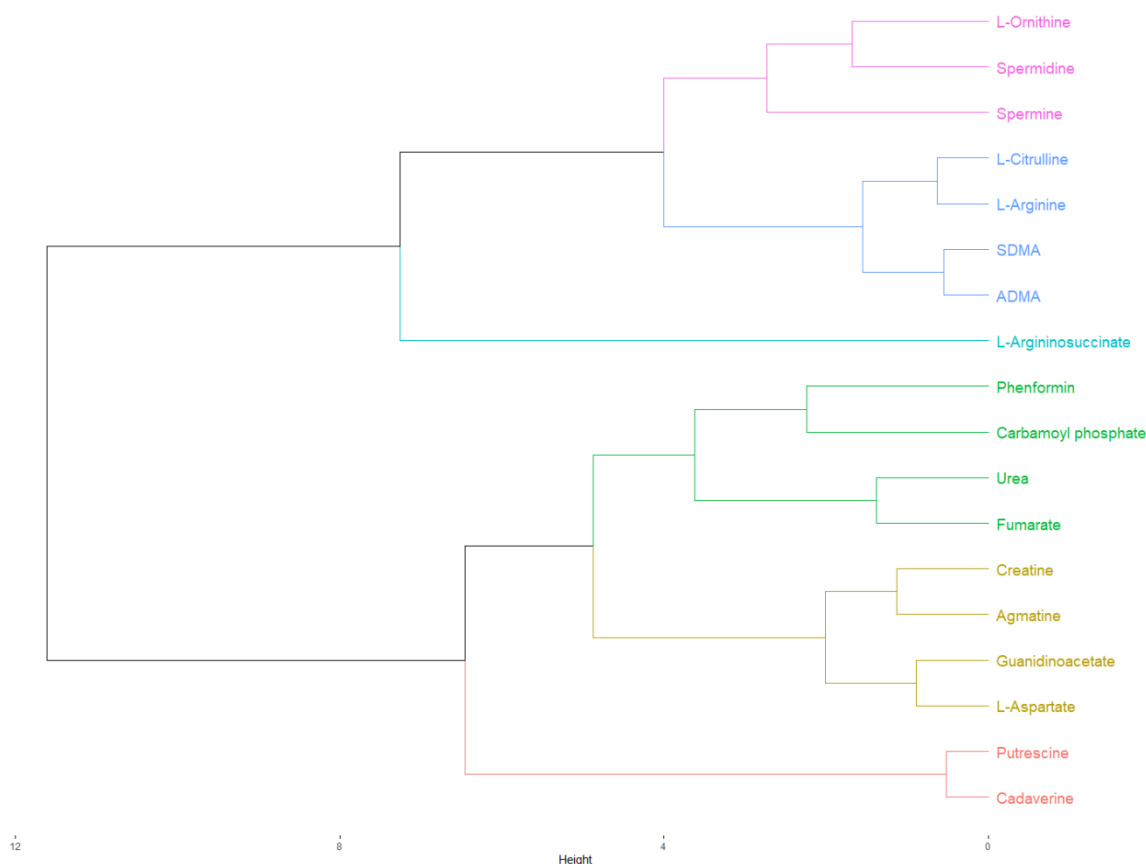

**Figure S9.** Hierarchical clustering of phenformin and candidate metabolites in the ionized modality.

### Methodology and complementary results of molecular docking simulations

- Search of PDB files**

After we predicted the possible targets for biguanides using the SwissTargetPrediction tool, we decided to add targets whose ligand or substrate is reported to be one included in our arginine-related metabolites database. Our final list of candidate targets was composed of four urea cycle enzymes including arginase 1 (ARG1), arginase 2 (ARG2), ornithine transcarbamylase (OTC), and argininosuccinate synthase (ASS); three enzymes involved in nitric oxide production including inducible nitric oxide synthase (iNOS), neural nitric oxide synthase (nNOS), and endothelial nitric oxide synthase (eNOS); three enzymes involved in the production and breakdown of asymmetric dimethylarginine including protein arginine methyltransferase (PRMT) 1, 4, and dimethylarginine dimethylaminohydrolase 1 (DDAH1); five enzymes from creatine metabolism, including the muscle-type, brain-type, and ubiquitous creatine kinases (CK), arginine:glycine amidinotransferase (AGAT), and guanidinoacetate N-methyltransferase (GAMT); four enzymes from polyamine metabolism spermidine synthase (SPDS), spermine synthase (SPMS), ornithine decarboxylase, and diamine oxidase (DAO); two intracellular sensors of L-arginine, including CASTOR1 and SLC38A9. Once we defined the candidate targets, we search for them in the Protein Data Bank. We limited our search to *Homo sapiens* and proteins with a resolution lower than 3 Å. In the case of SLC38A9, we used a PDB file from *Danio rerio* because the human PDB files had a lower quality in terms of resolution. The targets that we selected and their corresponding PDB codes are shown below in Table S1.

**Table S1.** Selected targets for molecular docking and their corresponding PDB codes

| Target  | PDB code |
|---------|----------|
| ARG1    | 6Q92     |
| ARG2    | 6Q37     |
| OTC     | 1C9Y     |
| ASS     | 2NZ2     |
| iNOS    | 3E7G     |
| eNOS    | 4D1O     |
| nNOS    | 4D1N     |
| PRMT1   | 6NT2     |
| PRMT4   | 5DWQ     |
| DDAH1   | 3I2E     |
| ODC     | 7S3G     |
| CKB     | 3B6R     |
| CKU     | 1QK1     |
| CKM     | 1I0E     |
| GAMT    | 3ORH     |
| AGAT    | 2JDW     |
| CASTOR1 | 5I2C     |
| SLC38A9 | 6C08     |
| DAO     | 3HIG     |
| SPMS    | 3C6K     |
| SPDS    | 2O06     |

- Validation of protein targets**

Once we identified the targets for molecular docking, we proceeded to download them in.pdb format and began with the quality analysis. First, we uploaded the different pdb files into the MolProbity platform to assess the quality of the crystallized protein models. Below, we show screen captures of the quality reports obtained in MolProbity.

**Summary statistics**

|                        |                                                                               |              |                                                      |
|------------------------|-------------------------------------------------------------------------------|--------------|------------------------------------------------------|
| All-Atom<br>Contacts   | Clashscore, all atoms:                                                        | 1.74         | 99 <sup>th</sup> percentile* (N=598, 1.50Å ± 0.25Å)  |
|                        | Clashscore is the number of serious steric overlaps (> 0.4 Å) per 1000 atoms. |              |                                                      |
| Protein<br>Geometry    | Poor rotamers                                                                 | 2            | 0.38% Goal: <0.3%                                    |
|                        | Favored rotamers                                                              | 507          | 95.30% Goal: >98%                                    |
|                        | Ramachandran outliers                                                         | 2            | 0.32% Goal: <0.05%                                   |
|                        | Ramachandran favored                                                          | 611          | 96.68% Goal: >98%                                    |
|                        | Rama distribution Z-score                                                     | -0.50 ± 0.32 | Goal: abs(Z score) < 2                               |
|                        | MolProbity score <sup>†</sup>                                                 | 1.14         | 98 <sup>th</sup> percentile* (N=4836, 1.50Å ± 0.25Å) |
|                        | Cβ deviations >0.25Å                                                          | 0            | 0.00% Goal: 0                                        |
|                        | Bad bonds:                                                                    | 0 / 4930     | 0.00% Goal: 0%                                       |
|                        | Bad angles:                                                                   | 0 / 6688     | 0.00% Goal: <0.1%                                    |
| Peptide Omegas         | Cis Prolines:                                                                 | 0 / 42       | 0.00% Expected: ≤1 per chain, or ≤5%                 |
|                        | Cis nonProlines:                                                              | 2 / 592      | 0.34% Goal: <0.05%                                   |
| Additional validations | Chiral volume outliers                                                        | 0/770        |                                                      |
|                        | Waters with clashes                                                           | 0/0          | 0.00% See UnDowser table for details                 |

In the two column results, the left column gives the raw count, right column gives the percentage.

\* 100<sup>th</sup> percentile is the best among structures of comparable resolution; 0<sup>th</sup> percentile is the worst. For clashscore the comparative set of structures was selected in 2004, for MolProbity score in 2006.

<sup>†</sup> MolProbity score combines the clashscore, rotamer, and Ramachandran evaluations into a single score, normalized to be on the same scale as X-ray resolution.

Key to table colors and cutoffs here: [P](#)

**Figure S10.** Quality report for 6Q92 (ARG1) obtained from MolProbity.

### Summary statistics

|                        |                                                                               |              |                                                      |                                                       |
|------------------------|-------------------------------------------------------------------------------|--------------|------------------------------------------------------|-------------------------------------------------------|
| All-Atom Contacts      | Clashscore, all atoms:                                                        | 1.77         | 100 <sup>th</sup> percentile* (N=773, 1.90Å ± 0.25Å) |                                                       |
|                        | Clashscore is the number of serious steric overlaps (> 0.4 Å) per 1000 atoms. |              |                                                      |                                                       |
| Protein Geometry       | Poor rotamers                                                                 | 13           | 4.71%                                                | Goal: <0.3%                                           |
|                        | Favored rotamers                                                              | 251          | 90.94%                                               | Goal: >98%                                            |
|                        | Ramachandran outliers                                                         | 1            | 0.31%                                                | Goal: <0.05%                                          |
|                        | Ramachandran favored                                                          | 310          | 97.18%                                               | Goal: >98%                                            |
|                        | Rama distribution Z-score                                                     | -1.27 ± 0.43 |                                                      | Goal: abs(Z score) < 2                                |
|                        | MolProbity score <sup>^</sup>                                                 | 1.59         |                                                      | 92 <sup>nd</sup> percentile* (N=12147, 1.90Å ± 0.25Å) |
|                        | Cβ deviations >0.25Å                                                          | 2            | 0.66%                                                | Goal: 0                                               |
|                        | Bad bonds:                                                                    | 13 / 2585    | 0.50%                                                | Goal: 0%                                              |
| Peptide Omegas         | Bad angles:                                                                   | 35 / 3497    | 1.00%                                                | Goal: <0.1%                                           |
|                        | Cis Prolines:                                                                 | 1 / 13       | 7.69%                                                | Expected: ≤1 per chain, or ≤5%                        |
| Additional validations | Chiral volume outliers                                                        | 0/398        |                                                      |                                                       |
|                        | Waters with clashes                                                           | 0/0          | 0.00%                                                | See UnDowser table for details                        |

In the two column results, the left column gives the raw count, right column gives the percentage.

\* 100<sup>th</sup> percentile is the best among structures of comparable resolution; 0<sup>th</sup> percentile is the worst. For clashscore the comparative set of structures was selected in 2004, for MolProbity score in 2006.

<sup>^</sup> MolProbity score combines the clashscore, rotamer, and Ramachandran evaluations into a single score, normalized to be on the same scale as X-ray resolution.

Key to table colors and cutoffs here: [🔗](#)

**Figure S11.** Quality report for 1C9Y (OTC) obtained from MolProbity.

### Summary statistics

|                        |                                                                              |              |        |                                                        |
|------------------------|------------------------------------------------------------------------------|--------------|--------|--------------------------------------------------------|
| All-Atom Contacts      | Clashscore, all atoms:                                                       | 6.59         |        | 98 <sup>th</sup> percentile* (N=331, 2.40 Å ± 0.25 Å)  |
|                        | Clashscore is the number of serious steric overlaps (> 0.4 Å) per 1000 atoms |              |        |                                                        |
| Protein Geometry       | Poor rotamers                                                                | 31           | 9.09%  | Goal: <0.3%                                            |
|                        | Favored rotamers                                                             | 276          | 80.94% | Goal: >98%                                             |
|                        | Ramachandran outliers                                                        | 2            | 0.51%  | Goal: <0.05%                                           |
|                        | Ramachandran favored                                                         | 380          | 95.96% | Goal: >98%                                             |
|                        | Rama distribution Z-score                                                    | -1.99 ± 0.38 |        | Goal: abs(Z score) < 2                                 |
|                        | MolProbity score <sup>^</sup>                                                | 2.37         |        | 77 <sup>th</sup> percentile* (N=8058, 2.40 Å ± 0.25 Å) |
|                        | Cβ deviations >0.25 Å                                                        | 15           | 4.02%  | Goal: 0                                                |
|                        | Bad bonds:                                                                   | 4 / 3270     | 0.12%  | Goal: 0%                                               |
|                        | Bad angles:                                                                  | 15 / 4419    | 0.34%  | Goal: <0.1%                                            |
| Peptide Omegas         | Cis Prolines:                                                                | 0 / 20       | 0.00%  | Expected: ≤1 per chain, or ≤5%                         |
|                        | Twisted Peptides:                                                            | 4 / 399      | 1.00%  | Goal: 0                                                |
| Additional validations | Tetrahedral geometry outliers                                                | 2            |        |                                                        |
|                        | Waters with clashes                                                          | 0/0          | 0.00%  | See UnDowser table for details                         |

In the two column results, the left column gives the raw count, right column gives the percentage.

\* 100<sup>th</sup> percentile is the best among structures of comparable resolution; 0<sup>th</sup> percentile is the worst. For clashscore the comparative set of structures was selected in 2004, for MolProbity score in 2006.

<sup>^</sup> MolProbity score combines the clashscore, rotamer, and Ramachandran evaluations into a single score, normalized to be on the same scale as X-ray resolution.

Key to table colors and cutoffs here: [🔗](#)

**Figure S12.** Quality report for 2N2Z (ASS) obtained from MolProbity.

### Summary statistics

|                        |                                                                               |              |        |                                                       |
|------------------------|-------------------------------------------------------------------------------|--------------|--------|-------------------------------------------------------|
| All-Atom Contacts      | Clashscore, all atoms:                                                        | 5.85         |        | 98 <sup>th</sup> percentile* (N=456, 2.20Å ± 0.25Å)   |
|                        | Clashscore is the number of serious steric overlaps (> 0.4 Å) per 1000 atoms. |              |        |                                                       |
| Protein Geometry       | Poor rotamers                                                                 | 12           | 1.64%  | Goal: <0.3%                                           |
|                        | Favored rotamers                                                              | 695          | 95.21% | Goal: >98%                                            |
|                        | Ramachandran outliers                                                         | 1            | 0.12%  | Goal: <0.05%                                          |
|                        | Ramachandran favored                                                          | 800          | 95.47% | Goal: >98%                                            |
|                        | Rama distribution Z-score                                                     | -1.05 ± 0.27 |        | Goal: abs(Z score) < 2                                |
|                        | MolProbity score <sup>^</sup>                                                 | 1.80         |        | 93 <sup>rd</sup> percentile* (N=10167, 2.20Å ± 0.25Å) |
|                        | Cβ deviations >0.25Å                                                          | 0            | 0.00%  | Goal: 0                                               |
|                        | Bad bonds:                                                                    | 10 / 7170    | 0.14%  | Goal: 0%                                              |
| Peptide Omegas         | Bad angles:                                                                   | 12 / 9764    | 0.12%  | Goal: <0.1%                                           |
|                        | Cis Prolines:                                                                 | 2 / 48       | 4.17%  | Expected: ≤1 per chain, or ≤5%                        |
| Additional validations | Tetrahedral geometry outliers                                                 | 2            |        |                                                       |
|                        | Waters with clashes                                                           | 0/0          | 0.00%  | See UnDowser table for details                        |

In the two column results, the left column gives the raw count, right column gives the percentage.

\* 100<sup>th</sup> percentile is the best among structures of comparable resolution; 0<sup>th</sup> percentile is the worst. For clashscore the comparative set of structures was selected in 2004, for MolProbity score in 2006.

<sup>^</sup> MolProbity score combines the clashscore, rotamer, and Ramachandran evaluations into a single score, normalized to be on the same scale as X-ray resolution.

Key to table colors and cutoffs here: [🔗](#)

**Figure S13.** Quality report for 3E7G (iNOS) obtained from MolProbity.

## Summary statistics

|                        |                                                                               |             |                                                       |
|------------------------|-------------------------------------------------------------------------------|-------------|-------------------------------------------------------|
| All-Atom Contacts      | Clashscore, all atoms:                                                        | 2.31        | 99 <sup>th</sup> percentile* (N=816, 1.82Å ± 0.25Å)   |
|                        | Clashscore is the number of serious steric overlaps (> 0.4 Å) per 1000 atoms. |             |                                                       |
| Protein Geometry       | Poor rotamers                                                                 | 10          | 1.45%                                                 |
|                        | Favored rotamers                                                              | 664         | 95.95%                                                |
|                        | Ramachandran outliers                                                         | 1           | 0.13%                                                 |
|                        | Ramachandran favored                                                          | 783         | 98.49%                                                |
|                        | Rama distribution Z-score                                                     | 0.53 ± 0.27 | Goal: abs(Z score) < 2                                |
|                        | MolProbity score <sup>^</sup>                                                 | 1.13        | 99 <sup>th</sup> percentile* (N=11325, 1.82Å ± 0.25Å) |
|                        | Cβ deviations >0.25Å                                                          | 0           | 0.00%                                                 |
|                        | Bad bonds:                                                                    | 2 / 6798    | 0.03%                                                 |
|                        | Bad angles:                                                                   | 4 / 9310    | 0.04%                                                 |
| Peptide Omegas         | Cis Prolines:                                                                 | 2 / 58      | 3.45%                                                 |
| Additional validations | Chiral volume outliers                                                        | 0/970       |                                                       |
|                        | Waters with clashes                                                           | 0/0         | 0.00%                                                 |

In the two column results, the left column gives the raw count, right column gives the percentage.

\* 100<sup>th</sup> percentile is the best among structures of comparable resolution; 0<sup>th</sup> percentile is the worst. For clashscore the comparative set of structures was selected in 2004, for MolProbity score in 2006.

<sup>^</sup> MolProbity score combines the clashscore, rotamer, and Ramachandran evaluations into a single score, normalized to be on the same scale as X-ray resolution.

Key to table colors and cutoffs here: [🔗](#)

**Figure S14.** Quality report for 4D1O (eNOS) obtained from MolProbity.

## Summary statistics

|                        |                                                                               |              |                                                       |
|------------------------|-------------------------------------------------------------------------------|--------------|-------------------------------------------------------|
| All-Atom Contacts      | Clashscore, all atoms:                                                        | 2.46         | 100 <sup>th</sup> percentile* (N=269, 2.48Å ± 0.25Å)  |
|                        | Clashscore is the number of serious steric overlaps (> 0.4 Å) per 1000 atoms. |              |                                                       |
| Protein Geometry       | Poor rotamers                                                                 | 5            | 0.81%                                                 |
|                        | Favored rotamers                                                              | 592          | 96.42%                                                |
|                        | Ramachandran outliers                                                         | 0            | 0.00%                                                 |
|                        | Ramachandran favored                                                          | 636          | 96.95%                                                |
|                        | Rama distribution Z-score                                                     | -0.49 ± 0.31 | Goal: abs(Z score) < 2                                |
|                        | MolProbity score <sup>^</sup>                                                 | 1.28         | 100 <sup>th</sup> percentile* (N=6912, 2.48Å ± 0.25Å) |
|                        | Cβ deviations >0.25Å                                                          | 0            | 0.00%                                                 |
|                        | Bad bonds:                                                                    | 0 / 5698     | 0.00%                                                 |
|                        | Bad angles:                                                                   | 0 / 7736     | 0.00%                                                 |
| Peptide Omegas         | Cis Prolines:                                                                 | 2 / 18       | 11.11%                                                |
| Additional validations | Chiral volume outliers                                                        | 0/846        |                                                       |
|                        | Waters with clashes                                                           | 0/0          | 0.00%                                                 |

In the two column results, the left column gives the raw count, right column gives the percentage.

\* 100<sup>th</sup> percentile is the best among structures of comparable resolution; 0<sup>th</sup> percentile is the worst. For clashscore the comparative set of structures was selected in 2004, for MolProbity score in 2006.

<sup>^</sup> MolProbity score combines the clashscore, rotamer, and Ramachandran evaluations into a single score, normalized to be on the same scale as X-ray resolution.

Key to table colors and cutoffs here: [🔗](#)

**Figure S15.** Quality report for 6NT2 (PRMT1) obtained from MolProbity.

## Summary statistics

|                        |                                                                               |              |                                                       |
|------------------------|-------------------------------------------------------------------------------|--------------|-------------------------------------------------------|
| All-Atom Contacts      | Clashscore, all atoms:                                                        | 0.55         | 100 <sup>th</sup> percentile* (N=336, 2.36Å ± 0.25Å)  |
|                        | Clashscore is the number of serious steric overlaps (> 0.4 Å) per 1000 atoms. |              |                                                       |
| Protein Geometry       | Poor rotamers                                                                 | 2            | 0.33%                                                 |
|                        | Favored rotamers                                                              | 572          | 95.49%                                                |
|                        | Ramachandran outliers                                                         | 0            | 0.00%                                                 |
|                        | Ramachandran favored                                                          | 634          | 96.04%                                                |
|                        | Rama distribution Z-score                                                     | -0.77 ± 0.30 | Goal: abs(Z score) < 2                                |
|                        | MolProbity score <sup>^</sup>                                                 | 0.96         | 100 <sup>th</sup> percentile* (N=8043, 2.36Å ± 0.25Å) |
|                        | Cβ deviations >0.25Å                                                          | 0            | 0.00%                                                 |
|                        | Bad bonds:                                                                    | 0 / 5648     | 0.00%                                                 |
|                        | Bad angles:                                                                   | 0 / 7658     | 0.00%                                                 |
| Peptide Omegas         | Cis Prolines:                                                                 | 2 / 26       | 7.69%                                                 |
| Additional validations | Chiral volume outliers                                                        | 0/839        |                                                       |
|                        | Waters with clashes                                                           | 0/0          | 0.00%                                                 |

In the two column results, the left column gives the raw count, right column gives the percentage.

\* 100<sup>th</sup> percentile is the best among structures of comparable resolution; 0<sup>th</sup> percentile is the worst. For clashscore the comparative set of structures was selected in 2004, for MolProbity score in 2006.

<sup>^</sup> MolProbity score combines the clashscore, rotamer, and Ramachandran evaluations into a single score, normalized to be on the same scale as X-ray resolution.

Key to table colors and cutoffs here: [🔗](#)

**Figure S16.** Quality report for 5DWQ (PRMT4) obtained from MolProbity.

### Summary statistics

|                        |                                                                               |              |                                                       |
|------------------------|-------------------------------------------------------------------------------|--------------|-------------------------------------------------------|
| All-Atom Contacts      | Clashscore, all atoms:                                                        | 5.25         | 97 <sup>th</sup> percentile* (N=677, 2.03Å ± 0.25Å)   |
|                        | Clashscore is the number of serious steric overlaps (> 0.4 Å) per 1000 atoms. |              |                                                       |
| Protein Geometry       | Poor rotamers                                                                 | 3            | 1.32% Goal: <0.3%                                     |
|                        | Favored rotamers                                                              | 222          | 97.80% Goal: >98%                                     |
|                        | Ramachandran outliers                                                         | 0            | 0.00% Goal: <0.05%                                    |
|                        | Ramachandran favored                                                          | 261          | 95.60% Goal: >98%                                     |
|                        | Rama distribution Z-score                                                     | -1.60 ± 0.44 | Goal: abs(Z score) < 2                                |
|                        | MolProbity score <sup>^</sup>                                                 | 1.68         | 92 <sup>nd</sup> percentile* (N=12152, 2.03Å ± 0.25Å) |
|                        | Cβ deviations >0.25Å                                                          | 0            | 0.00% Goal: 0                                         |
|                        | Bad bonds:                                                                    | 0 / 2121     | 0.00% Goal: 0%                                        |
|                        | Bad angles:                                                                   | 0 / 2870     | 0.00% Goal: <0.1%                                     |
| Peptide Omegas         | Cis Prolines:                                                                 | 0 / 12       | 0.00% Expected: ≤1 per chain, or ≤5%                  |
| Additional validations | Chiral volume outliers                                                        | 0/337        |                                                       |
|                        | Waters with clashes                                                           | 0/0          | 0.00% See UnDowser table for details                  |

In the two column results, the left column gives the raw count, right column gives the percentage.

\* 100<sup>th</sup> percentile is the best among structures of comparable resolution; 0<sup>th</sup> percentile is the worst. For clashscore the comparative set of structures was selected in 2004, for MolProbity score in 2006.

<sup>^</sup> MolProbity score combines the clashscore, rotamer, and Ramachandran evaluations into a single score, normalized to be on the same scale as X-ray resolution.

Key to table colors and cutoffs here: [P](#)

**Figure S17.** Quality report for 3I2E (DDAH1) obtained from MolProbity.

### Summary statistics

|                        |                                                                               |             |                                                       |
|------------------------|-------------------------------------------------------------------------------|-------------|-------------------------------------------------------|
| All-Atom Contacts      | Clashscore, all atoms:                                                        | 2.55        | 99 <sup>th</sup> percentile* (N=791, 1.66Å ± 0.25Å)   |
|                        | Clashscore is the number of serious steric overlaps (> 0.4 Å) per 1000 atoms. |             |                                                       |
| Protein Geometry       | Poor rotamers                                                                 | 7           | 1.02% Goal: <0.3%                                     |
|                        | Favored rotamers                                                              | 654         | 95.75% Goal: >98%                                     |
|                        | Ramachandran outliers                                                         | 0           | 0.00% Goal: <0.05%                                    |
|                        | Ramachandran favored                                                          | 779         | 98.48% Goal: >98%                                     |
|                        | Rama distribution Z-score                                                     | 0.20 ± 0.29 | Goal: abs(Z score) < 2                                |
|                        | MolProbity score <sup>^</sup>                                                 | 1.05        | 100 <sup>th</sup> percentile* (N=8776, 1.66Å ± 0.25Å) |
|                        | Cβ deviations >0.25Å                                                          | 0           | 0.00% Goal: 0                                         |
|                        | Bad bonds:                                                                    | 1 / 6442    | 0.02% Goal: 0%                                        |
|                        | Bad angles:                                                                   | 2 / 8722    | 0.02% Goal: <0.1%                                     |
| Peptide Omegas         | Cis Prolines:                                                                 | 0 / 35      | 0.00% Expected: ≤1 per chain, or ≤5%                  |
| Additional validations | Chiral volume outliers                                                        | 0/965       |                                                       |
|                        | Waters with clashes                                                           | 0/0         | 0.00% See UnDowser table for details                  |

In the two column results, the left column gives the raw count, right column gives the percentage.

\* 100<sup>th</sup> percentile is the best among structures of comparable resolution; 0<sup>th</sup> percentile is the worst. For clashscore the comparative set of structures was selected in 2004, for MolProbity score in 2006.

<sup>^</sup> MolProbity score combines the clashscore, rotamer, and Ramachandran evaluations into a single score, normalized to be on the same scale as X-ray resolution.

Key to table colors and cutoffs here: [P](#)

**Figure S18.** Quality report for 7S3G (ODC) obtained from MolProbity.

### Summary statistics

|                        |                                                                               |             |                                                        |
|------------------------|-------------------------------------------------------------------------------|-------------|--------------------------------------------------------|
| All-Atom Contacts      | Clashscore, all atoms:                                                        | 2.53        | 100 <sup>th</sup> percentile* (N=457, 2.21Å ± 0.25Å)   |
|                        | Clashscore is the number of serious steric overlaps (> 0.4 Å) per 1000 atoms. |             |                                                        |
| Protein Geometry       | Poor rotamers                                                                 | 1           | 0.38% Goal: <0.3%                                      |
|                        | Favored rotamers                                                              | 244         | 92.08% Goal: >98%                                      |
|                        | Ramachandran outliers                                                         | 1           | 0.33% Goal: <0.05%                                     |
|                        | Ramachandran favored                                                          | 297         | 97.70% Goal: >98%                                      |
|                        | Rama distribution Z-score                                                     | 0.40 ± 0.45 | Goal: abs(Z score) < 2                                 |
|                        | MolProbity score <sup>^</sup>                                                 | 1.09        | 100 <sup>th</sup> percentile* (N=10183, 2.21Å ± 0.25Å) |
|                        | Cβ deviations >0.25Å                                                          | 0           | 0.00% Goal: 0                                          |
|                        | Bad bonds:                                                                    | 0 / 2433    | 0.00% Goal: 0%                                         |
|                        | Bad angles:                                                                   | 0 / 3323    | 0.00% Goal: <0.1%                                      |
| Peptide Omegas         | Cis Prolines:                                                                 | 0 / 18      | 0.00% Expected: ≤1 per chain, or ≤5%                   |
| Additional validations | Cis nonProlines:                                                              | 1 / 295     | 0.34% Goal: <0.05%                                     |
|                        | Chiral volume outliers                                                        | 0/382       |                                                        |
| Additional validations | Waters with clashes                                                           | 0/0         | 0.00% See UnDowser table for details                   |

In the two column results, the left column gives the raw count, right column gives the percentage.

\* 100<sup>th</sup> percentile is the best among structures of comparable resolution; 0<sup>th</sup> percentile is the worst. For clashscore the comparative set of structures was selected in 2004, for MolProbity score in 2006.

<sup>^</sup> MolProbity score combines the clashscore, rotamer, and Ramachandran evaluations into a single score, normalized to be on the same scale as X-ray resolution.

Key to table colors and cutoffs here: [P](#)

**Figure S19.** Quality report for 6Q37 (ARG2) obtained from MolProbity.

### Summary statistics

|                        |                                                                               |              |                                                       |
|------------------------|-------------------------------------------------------------------------------|--------------|-------------------------------------------------------|
| All-Atom Contacts      | Clashscore, all atoms:                                                        | 1.62         | 100 <sup>th</sup> percentile* (N=677, 2.03Å ± 0.25Å)  |
|                        | Clashscore is the number of serious steric overlaps (> 0.4 Å) per 1000 atoms. |              |                                                       |
| Protein Geometry       | Poor rotamers                                                                 | 10           | 2.65% Goal: <0.3%                                     |
|                        | Favored rotamers                                                              | 352          | 93.37% Goal: >98%                                     |
|                        | Ramachandran outliers                                                         | 0            | 0.00% Goal: <0.05%                                    |
|                        | Ramachandran favored                                                          | 410          | 98.09% Goal: >98%                                     |
|                        | Rama distribution Z-score                                                     | -0.39 ± 0.38 | Goal: abs(Z score) < 2                                |
|                        | MolProbity score <sup>^</sup>                                                 | 1.23         | 99 <sup>th</sup> percentile* (N=12152, 2.03Å ± 0.25Å) |
|                        | Cβ deviations >0.25Å                                                          | 1            | 0.25% Goal: 0                                         |
|                        | Bad bonds:                                                                    | 0 / 3541     | 0.00% Goal: 0%                                        |
|                        | Bad angles:                                                                   | 1 / 4808     | 0.02% Goal: <0.1%                                     |
| Peptide Omegas         | Cis Prolines:                                                                 | 1 / 24       | 4.17% Expected: ≤1 per chain, or ≤5%                  |
| Additional validations | Chiral volume outliers                                                        | 0/505        |                                                       |
|                        | Waters with clashes                                                           | 0/0          | 0.00% See UnDowser table for details                  |

In the two column results, the left column gives the raw count, right column gives the percentage.

\* 100<sup>th</sup> percentile is the best among structures of comparable resolution; 0<sup>th</sup> percentile is the worst. For clashscore the comparative set of structures was selected in 2004, for MolProbity score in 2006.

<sup>^</sup> MolProbity score combines the clashscore, rotamer, and Ramachandran evaluations into a single score, normalized to be on the same scale as X-ray resolution.

Key to table colors and cutoffs here: [🔑](#)

**Figure S20.** Quality report for 4D1N (nNOS) obtained from MolProbity.

### Summary statistics

|                         |                                                                               |              |                                                      |
|-------------------------|-------------------------------------------------------------------------------|--------------|------------------------------------------------------|
| All-Atom Contacts       | Clashscore, all atoms:                                                        | 8.1          | 98 <sup>th</sup> percentile* (N=189, 2.70Å ± 0.25Å)  |
|                         | Clashscore is the number of serious steric overlaps (> 0.4 Å) per 1000 atoms. |              |                                                      |
| Protein Geometry        | Poor rotamers                                                                 | 21           | 6.40% Goal: <0.3%                                    |
|                         | Favored rotamers                                                              | 290          | 88.41% Goal: >98%                                    |
|                         | Ramachandran outliers                                                         | 4            | 1.06% Goal: <0.05%                                   |
|                         | Ramachandran favored                                                          | 360          | 95.49% Goal: >98%                                    |
|                         | Rama distribution Z-score                                                     | -1.53 ± 0.37 | Goal: abs(Z score) < 2                               |
|                         | MolProbity score <sup>^</sup>                                                 | 2.37         | 91 <sup>st</sup> percentile* (N=5412, 2.70Å ± 0.25Å) |
|                         | Cβ deviations >0.25Å                                                          | 2            | 0.57% Goal: 0                                        |
|                         | Bad bonds:                                                                    | 0 / 3099     | 0.00% Goal: 0%                                       |
|                         | Bad angles:                                                                   | 2 / 4191     | 0.05% Goal: <0.1%                                    |
| Peptide Omegas          | Cis Prolines:                                                                 | 1 / 19       | 5.26% Expected: ≤1 per chain, or ≤5%                 |
| Low-resolution Criteria | CaBLAM outliers                                                               | 14           | 3.7% Goal: <1.0%                                     |
|                         | CA Geometry outliers                                                          | 2            | 0.53% Goal: <0.5%                                    |
| Additional validations  | Chiral volume outliers                                                        | 0/453        |                                                      |
|                         | Waters with clashes                                                           | 3/46         | 6.52% See UnDowser table for details                 |

In the two column results, the left column gives the raw count, right column gives the percentage.

\* 100<sup>th</sup> percentile is the best among structures of comparable resolution; 0<sup>th</sup> percentile is the worst. For clashscore the comparative set of structures was selected in 2004, for MolProbity score in 2006.

<sup>^</sup> MolProbity score combines the clashscore, rotamer, and Ramachandran evaluations into a single score, normalized to be on the same scale as X-ray resolution.

Key to table colors and cutoffs here: [🔑](#)

**Figure S21.** Quality report for 1QK1 (CKU) obtained from MolProbity.

### Summary statistics

|                         |                                                                               |              |                                                     |
|-------------------------|-------------------------------------------------------------------------------|--------------|-----------------------------------------------------|
| All-Atom Contacts       | Clashscore, all atoms:                                                        | 54.24        | 45 <sup>th</sup> percentile* (N=37, 3Å - 9999Å)     |
|                         | Clashscore is the number of serious steric overlaps (> 0.4 Å) per 1000 atoms. |              |                                                     |
| Protein Geometry        | Poor rotamers                                                                 | 41           | 12.89% Goal: <0.3%                                  |
|                         | Favored rotamers                                                              | 235          | 73.90% Goal: >98%                                   |
|                         | Ramachandran outliers                                                         | 16           | 4.43% Goal: <0.05%                                  |
|                         | Ramachandran favored                                                          | 281          | 77.84% Goal: >98%                                   |
|                         | Rama distribution Z-score                                                     | -6.08 ± 0.29 | Goal: abs(Z score) < 2                              |
|                         | MolProbity score <sup>^</sup>                                                 | 3.81         | 46 <sup>th</sup> percentile* (N=342, 3.50Å ± 0.25Å) |
|                         | Cβ deviations >0.25Å                                                          | 0            | 0.00% Goal: 0                                       |
|                         | Bad bonds:                                                                    | 0 / 2965     | 0.00% Goal: 0%                                      |
|                         | Bad angles:                                                                   | 1 / 3994     | 0.03% Goal: <0.1%                                   |
| Peptide Omegas          | Cis Prolines:                                                                 | 1 / 18       | 5.56% Expected: ≤1 per chain, or ≤5%                |
| Low-resolution Criteria | CaBLAM outliers                                                               | 15           | 4.2% Goal: <1.0%                                    |
|                         | CA Geometry outliers                                                          | 6            | 1.68% Goal: <0.5%                                   |
| Additional validations  | Chiral volume outliers                                                        | 0/428        |                                                     |
|                         | Waters with clashes                                                           | 0/0          | 0.00% See UnDowser table for details                |

In the two column results, the left column gives the raw count, right column gives the percentage.

\* 100<sup>th</sup> percentile is the best among structures of comparable resolution; 0<sup>th</sup> percentile is the worst. For clashscore the comparative set of structures was selected in 2004, for MolProbity score in 2006.

<sup>^</sup> MolProbity score combines the clashscore, rotamer, and Ramachandran evaluations into a single score, normalized to be on the same scale as X-ray resolution.

Key to table colors and cutoffs here: [🔑](#)

**Figure S22.** Quality report for 110E (CKM) obtained from MolProbity.

### Summary statistics

|                        |                                                                               |              |                                                       |
|------------------------|-------------------------------------------------------------------------------|--------------|-------------------------------------------------------|
| All-Atom Contacts      | Clashscore, all atoms:                                                        | 1.67         | 100 <sup>th</sup> percentile* (N=777, 1.86Å ± 0.25Å)  |
|                        | Clashscore is the number of serious steric overlaps (> 0.4 Å) per 1000 atoms. |              |                                                       |
| Protein Geometry       | Poor rotamers                                                                 | 0            | 0.00% Goal: <0.3%                                     |
|                        | Favored rotamers                                                              | 182          | 96.30% Goal: >98%                                     |
|                        | Ramachandran outliers                                                         | 0            | 0.00% Goal: <0.05%                                    |
|                        | Ramachandran favored                                                          | 219          | 96.05% Goal: >98%                                     |
|                        | Rama distribution Z-score                                                     | -0.11 ± 0.55 | Goal: abs(Z score) < 2                                |
|                        | MolProbity score                                                              | 1.19         | 99 <sup>th</sup> percentile* (N=11957, 1.86Å ± 0.25Å) |
|                        | Cβ deviations >0.25Å                                                          | 0            | 0.00% Goal: 0                                         |
|                        | Bad bonds:                                                                    | 1 / 1873     | 0.05% Goal: 0%                                        |
|                        | Bad angles:                                                                   | 3 / 2554     | 0.12% Goal: <0.1%                                     |
| Peptide Omegas         | Cis Prolines:                                                                 | 0 / 18       | 0.00% Expected: ≤1 per chain, or ≤5%                  |
| Additional validations | Chiral volume outliers                                                        | 0/272        |                                                       |
|                        | Waters with clashes                                                           | 0/0          | 0.00% See UnDowser table for details                  |

In the two column results, the left column gives the raw count, right column gives the percentage.

\* 100<sup>th</sup> percentile is the best among structures of comparable resolution; 0<sup>th</sup> percentile is the worst. For clashscore the comparative set of structures was selected in 2004, for MolProbity score in 2006.

^ MolProbity score combines the clashscore, rotamer, and Ramachandran evaluations into a single score, normalized to be on the same scale as X-ray resolution.

Key to table colors and cutoffs here: [?](#)

**Figure S23.** Quality report for 3ORH (GAMT) obtained from MolProbity.

### Summary statistics

|                        |                                                                               |              |                                                       |
|------------------------|-------------------------------------------------------------------------------|--------------|-------------------------------------------------------|
| All-Atom Contacts      | Clashscore, all atoms:                                                        | 4.3          | 99 <sup>th</sup> percentile* (N=576, 2.10Å ± 0.25Å)   |
|                        | Clashscore is the number of serious steric overlaps (> 0.4 Å) per 1000 atoms. |              |                                                       |
| Protein Geometry       | Poor rotamers                                                                 | 7            | 2.19% Goal: <0.3%                                     |
|                        | Favored rotamers                                                              | 297          | 93.10% Goal: >98%                                     |
|                        | Ramachandran outliers                                                         | 0            | 0.00% Goal: <0.05%                                    |
|                        | Ramachandran favored                                                          | 340          | 94.97% Goal: >98%                                     |
|                        | Rama distribution Z-score                                                     | -1.54 ± 0.41 | Goal: abs(Z score) < 2                                |
|                        | MolProbity score ^                                                            | 1.82         | 90 <sup>th</sup> percentile* (N=11758, 2.10Å ± 0.25Å) |
|                        | Cβ deviations >0.25Å                                                          | 2            | 0.58% Goal: 0                                         |
|                        | Bad bonds:                                                                    | 0 / 3027     | 0.00% Goal: 0%                                        |
|                        | Bad angles:                                                                   | 1 / 4116     | 0.02% Goal: <0.1%                                     |
| Peptide Omegas         | Cis Prolines:                                                                 | 1 / 27       | 3.70% Expected: ≤1 per chain, or ≤5%                  |
| Additional validations | Chiral volume outliers                                                        | 0/433        |                                                       |
|                        | Waters with clashes                                                           | 4/196        | 2.04% See UnDowser table for details                  |

In the two column results, the left column gives the raw count, right column gives the percentage.

\* 100<sup>th</sup> percentile is the best among structures of comparable resolution; 0<sup>th</sup> percentile is the worst. For clashscore the comparative set of structures was selected in 2004, for MolProbity score in 2006.

^ MolProbity score combines the clashscore, rotamer, and Ramachandran evaluations into a single score, normalized to be on the same scale as X-ray resolution.

Key to table colors and cutoffs here: [?](#)

**Figure S24.** Quality report for 2JDW (AGAT) obtained from MolProbity.

### Summary statistics

|                        |                                                                               |              |                                                        |
|------------------------|-------------------------------------------------------------------------------|--------------|--------------------------------------------------------|
| All-Atom Contacts      | Clashscore, all atoms:                                                        | 2.79         | 99 <sup>th</sup> percentile* (N=837, 1.80Å ± 0.25Å)    |
|                        | Clashscore is the number of serious steric overlaps (> 0.4 Å) per 1000 atoms. |              |                                                        |
| Protein Geometry       | Poor rotamers                                                                 | 0            | 0.00% Goal: <0.3%                                      |
|                        | Favored rotamers                                                              | 250          | 96.15% Goal: >98%                                      |
|                        | Ramachandran outliers                                                         | 0            | 0.00% Goal: <0.05%                                     |
|                        | Ramachandran favored                                                          | 291          | 99.32% Goal: >98%                                      |
|                        | Rama distribution Z-score                                                     | -0.10 ± 0.47 | Goal: abs(Z score) < 2                                 |
|                        | MolProbity score ^                                                            | 1.07         | 100 <sup>th</sup> percentile* (N=11444, 1.80Å ± 0.25Å) |
|                        | Cβ deviations >0.25Å                                                          | 0            | 0.00% Goal: 0                                          |
|                        | Bad bonds:                                                                    | 0 / 2399     | 0.00% Goal: 0%                                         |
|                        | Bad angles:                                                                   | 1 / 3277     | 0.03% Goal: <0.1%                                      |
| Peptide Omegas         | Cis Prolines:                                                                 | 0 / 22       | 0.00% Expected: ≤1 per chain, or ≤5%                   |
| Additional validations | Chiral volume outliers                                                        | 0/389        |                                                        |
|                        | Waters with clashes                                                           | 0/0          | 0.00% See UnDowser table for details                   |

In the two column results, the left column gives the raw count, right column gives the percentage.

\* 100<sup>th</sup> percentile is the best among structures of comparable resolution; 0<sup>th</sup> percentile is the worst. For clashscore the comparative set of structures was selected in 2004, for MolProbity score in 2006.

^ MolProbity score combines the clashscore, rotamer, and Ramachandran evaluations into a single score, normalized to be on the same scale as X-ray resolution.

Key to table colors and cutoffs here: [?](#)

**Figure S25.** Quality report for 5I2C (CASTOR1) obtained from MolProbity.



Summary statistics

|                        |                                                                               |              |        |                                                        |
|------------------------|-------------------------------------------------------------------------------|--------------|--------|--------------------------------------------------------|
| All-Atom<br>Contacts   | Clashscore, all atoms:                                                        | 2.29         |        | 99 <sup>th</sup> percentile* (N=575, 2.09Å ± 0.25Å)    |
|                        | Clashscore is the number of serious steric overlaps (> 0.4 Å) per 1000 atoms. |              |        |                                                        |
| Protein<br>Geometry    | Poor rotamers                                                                 | 5            | 0.81%  | Goal: <0.3%                                            |
|                        | Favored rotamers                                                              | 590          | 95.62% | Goal: >98%                                             |
|                        | Ramachandran outliers                                                         | 0            | 0.00%  | Goal: <0.05%                                           |
|                        | Ramachandran favored                                                          | 692          | 97.74% | Goal: >98%                                             |
|                        | Rama distribution Z-score                                                     | -0.59 ± 0.28 |        | Goal: abs(Z score) < 2                                 |
|                        | MolProbity score <sup>^</sup>                                                 | 1.07         |        | 100 <sup>th</sup> percentile* (N=11618, 2.09Å ± 0.25Å) |
|                        | Cβ deviations >0.25Å                                                          | 0            | 0.00%  | Goal: 0                                                |
|                        | Bad bonds:                                                                    | 0 / 6033     | 0.00%  | Goal: 0%                                               |
|                        | Bad angles:                                                                   | 0 / 8283     | 0.00%  | Goal: <0.1%                                            |
| Peptide Omegas         | Cis Prolines:                                                                 | 4 / 57       | 7.02%  | Expected: ≤1 per chain, or ≤5%                         |
| Additional validations | Chiral volume outliers                                                        | 0/874        |        |                                                        |
|                        | Waters with clashes                                                           | 0/0          | 0.00%  | See UnDowser table for details                         |

In the two column results, the left column gives the raw count, right column gives the percentage.  
\* 100<sup>th</sup> percentile is the best among structures of comparable resolution; 0<sup>th</sup> percentile is the worst. For clashscore the comparative set of structures was selected in 2004, for MolProbity score in 2006.  
<sup>^</sup> MolProbity score combines the clashscore, rotamer, and Ramachandran evaluations into a single score, normalized to be on the same scale as X-ray resolution.  
Key to table colors and cutoffs here: [?](#)

Figure S26. Quality report for 3HIG (DAO) obtained from MolProbity.

Summary statistics

|                        |                                                                               |              |        |                                                       |
|------------------------|-------------------------------------------------------------------------------|--------------|--------|-------------------------------------------------------|
| All-Atom<br>Contacts   | Clashscore, all atoms:                                                        | 8.37         |        | 89 <sup>th</sup> percentile* (N=715, 2.00Å ± 0.25Å)   |
|                        | Clashscore is the number of serious steric overlaps (> 0.4 Å) per 1000 atoms. |              |        |                                                       |
| Protein<br>Geometry    | Poor rotamers                                                                 | 10           | 3.11%  | Goal: <0.3%                                           |
|                        | Favored rotamers                                                              | 304          | 94.41% | Goal: >98%                                            |
|                        | Ramachandran outliers                                                         | 1            | 0.27%  | Goal: <0.05%                                          |
|                        | Ramachandran favored                                                          | 367          | 98.13% | Goal: >98%                                            |
|                        | Rama distribution Z-score                                                     | -1.01 ± 0.37 |        | Goal: abs(Z score) < 2                                |
|                        | MolProbity score <sup>^</sup>                                                 | 1.83         |        | 85 <sup>th</sup> percentile* (N=12522, 2.00Å ± 0.25Å) |
|                        | Cβ deviations >0.25Å                                                          | 0            | 0.00%  | Goal: 0                                               |
|                        | Bad bonds:                                                                    | 0 / 3023     | 0.00%  | Goal: 0%                                              |
|                        | Bad angles:                                                                   | 1 / 4089     | 0.02%  | Goal: <0.1%                                           |
| Peptide Omegas         | Cis Prolines:                                                                 | 1 / 19       | 5.26%  | Expected: ≤1 per chain, or ≤5%                        |
| Additional validations | Chiral volume outliers                                                        | 0/442        |        |                                                       |
|                        | Waters with clashes                                                           | 0/0          | 0.00%  | See UnDowser table for details                        |

In the two column results, the left column gives the raw count, right column gives the percentage.  
\* 100<sup>th</sup> percentile is the best among structures of comparable resolution; 0<sup>th</sup> percentile is the worst. For clashscore the comparative set of structures was selected in 2004, for MolProbity score in 2006.  
<sup>^</sup> MolProbity score combines the clashscore, rotamer, and Ramachandran evaluations into a single score, normalized to be on the same scale as X-ray resolution.  
Key to table colors and cutoffs here: [?](#)

Figure S27. Quality report for 3B6R (CKB) obtained from MolProbity.

Summary statistics

|                         |                                                                               |              |        |                                                       |
|-------------------------|-------------------------------------------------------------------------------|--------------|--------|-------------------------------------------------------|
| All-Atom<br>Contacts    | Clashscore, all atoms:                                                        | 24.4         |        | 87 <sup>th</sup> percentile * (N=41, 2.92Å - 9999Å)   |
|                         | Clashscore is the number of serious steric overlaps (> 0.4 Å) per 1000 atoms. |              |        |                                                       |
| Protein<br>Geometry     | Poor rotamers                                                                 | 1            | 0.30%  | Goal: <0.3%                                           |
|                         | Favored rotamers                                                              | 262          | 78.92% | Goal: >98%                                            |
|                         | Ramachandran outliers                                                         | 30           | 8.13%  | Goal: <0.05%                                          |
|                         | Ramachandran favored                                                          | 305          | 82.66% | Goal: >98%                                            |
|                         | Rama distribution Z-score                                                     | -2.76 ± 0.41 |        | Goal: abs(Z score) < 2                                |
|                         | MolProbity score <sup>^</sup>                                                 | 2.58         |        | 96 <sup>th</sup> percentile * (N=1550, 3.17Å ± 0.25Å) |
|                         | Cβ deviations >0.25Å                                                          | 0            | 0.00%  | Goal: 0                                               |
|                         | Bad bonds:                                                                    | 0 / 3145     | 0.00%  | Goal: 0%                                              |
|                         | Bad angles:                                                                   | 6 / 4275     | 0.14%  | Goal: <0.1%                                           |
| Peptide Omegas          | Cis Prolines:                                                                 | 0 / 16       | 0.00%  | Expected: ≤1 per chain, or ≤5%                        |
| Low-resolution Criteria | CaBLAM outliers                                                               | 27           | 7.6%   | Goal: <1.0%                                           |
|                         | CA Geometry outliers                                                          | 5            | 1.42%  | Goal: <0.5%                                           |
| Additional validations  | Chiral volume outliers                                                        | 0.498        |        |                                                       |
|                         | Waters with clashes                                                           | 0/0          | 0.00%  | See UnDowser table for details                        |

In the two column results, the left column gives the raw count, right column gives the percentage.  
\* 100<sup>th</sup> percentile is the best among structures of comparable resolution; 0<sup>th</sup> percentile is the worst. For clashscore the comparative set of structures was selected in 2004, for MolProbity score in 2006.  
<sup>^</sup> MolProbity score combines the clashscore, rotamer, and Ramachandran evaluations into a single score, normalized to be on the same scale as X-ray resolution.  
Key to table colors and cutoffs here: [?](#)

Figure S28. Quality report for 6C08 (SLC38A9) obtained from MolProbity.

### Summary statistics

|                        |                                                                               |              |                                                        |
|------------------------|-------------------------------------------------------------------------------|--------------|--------------------------------------------------------|
| All-Atom Contacts      | Clashscore, all atoms:                                                        | 2.57         | 99 <sup>th</sup> percentile* (N=715, 2.00Å ± 0.25Å)    |
|                        | Clashscore is the number of serious steric overlaps (> 0.4 Å) per 1000 atoms. |              |                                                        |
| Protein Geometry       | Poor rotamers                                                                 | 3            | 1.16% Goal: <0.3%                                      |
|                        | Favored rotamers                                                              | 246          | 94.98% Goal: >98%                                      |
|                        | Ramachandran outliers                                                         | 0            | 0.00% Goal: <0.05%                                     |
|                        | Ramachandran favored                                                          | 288          | 97.63% Goal: >98%                                      |
|                        | Rama distribution Z-score                                                     | -0.46 ± 0.48 | Goal: abs(Z score) < 2                                 |
|                        | MolProbity score <sup>^</sup>                                                 | 1.17         | 100 <sup>th</sup> percentile* (N=12522, 2.00Å ± 0.25Å) |
|                        | Cβ deviations >0.25Å                                                          | 2            | 0.71% Goal: 0                                          |
|                        | Bad bonds:                                                                    | 0 / 2408     | 0.00% Goal: 0%                                         |
|                        | Bad angles:                                                                   | 0 / 3268     | 0.00% Goal: <0.1%                                      |
| Peptide Omegas         | Cis Prolines:                                                                 | 0 / 17       | 0.00% Expected: ≤1 per chain, or ≤5%                   |
| Additional validations | Chiral volume outliers                                                        | 0/356        |                                                        |
|                        | Waters with clashes                                                           | 0/0          | 0.00% See UnDowser table for details                   |

In the two column results, the left column gives the raw count, right column gives the percentage.

\* 100<sup>th</sup> percentile is the best among structures of comparable resolution; 0<sup>th</sup> percentile is the worst. For clashscore the comparative set of structures was selected in 2004, for MolProbity score in 2006.

<sup>^</sup> MolProbity score combines the clashscore, rotamer, and Ramachandran evaluations into a single score, normalized to be on the same scale as X-ray resolution.

Key to table colors and cutoffs here: [P](#)

**Figure S29.** Quality report for 2006 (SPDS) obtained from MolProbity.

### Summary statistics

|                        |                                                                               |              |                                                       |
|------------------------|-------------------------------------------------------------------------------|--------------|-------------------------------------------------------|
| All-Atom Contacts      | Clashscore, all atoms:                                                        | 3.91         | 99 <sup>th</sup> percentile* (N=821, 1.95Å ± 0.25Å)   |
|                        | Clashscore is the number of serious steric overlaps (> 0.4 Å) per 1000 atoms. |              |                                                       |
| Protein Geometry       | Poor rotamers                                                                 | 10           | 3.37% Goal: <0.3%                                     |
|                        | Favored rotamers                                                              | 271          | 91.25% Goal: >98%                                     |
|                        | Ramachandran outliers                                                         | 0            | 0.00% Goal: <0.05%                                    |
|                        | Ramachandran favored                                                          | 313          | 96.90% Goal: >98%                                     |
|                        | Rama distribution Z-score                                                     | -0.24 ± 0.44 | Goal: abs(Z score) < 2                                |
|                        | MolProbity score <sup>^</sup>                                                 | 1.76         | 86 <sup>th</sup> percentile* (N=13349, 1.95Å ± 0.25Å) |
|                        | Cβ deviations >0.25Å                                                          | 3            | 0.97% Goal: 0                                         |
|                        | Bad bonds:                                                                    | 0 / 2727     | 0.00% Goal: 0%                                        |
|                        | Bad angles:                                                                   | 0 / 3677     | 0.00% Goal: <0.1%                                     |
| Peptide Omegas         | Cis Prolines:                                                                 | 0 / 10       | 0.00% Expected: ≤1 per chain, or ≤5%                  |
| Additional validations | Chiral volume outliers                                                        | 0/414        |                                                       |
|                        | Waters with clashes                                                           | 0/0          | 0.00% See UnDowser table for details                  |

In the two column results, the left column gives the raw count, right column gives the percentage.

\* 100<sup>th</sup> percentile is the best among structures of comparable resolution; 0<sup>th</sup> percentile is the worst. For clashscore the comparative set of structures was selected in 2004, for MolProbity score in 2006.

<sup>^</sup> MolProbity score combines the clashscore, rotamer, and Ramachandran evaluations into a single score, normalized to be on the same scale as X-ray resolution.

Key to table colors and cutoffs here: [P](#)

**Figure S30.** Quality report for 3C6K (SPMS) obtained from MolProbity.

As can be observed, some parameters were bad for different targets according to the quality reports obtained from MolProbity. For this reason, we decided to perform a minimization of energy in UCSF Chimera in the low-quality targets, aiming to improve some parameters before the molecular docking simulations. We performed the minimizations using 1000 steepest descent steps in the minimize structure tool. The quality reports after the minimization of energy of proteins are shown below:

### Summary statistics

|                        |                                                                               |              |                                                       |
|------------------------|-------------------------------------------------------------------------------|--------------|-------------------------------------------------------|
| All-Atom Contacts      | Clashscore, all atoms:                                                        | 0.2          | 100 <sup>th</sup> percentile* (N=773, 1.90Å ± 0.25Å)  |
|                        | Clashscore is the number of serious steric overlaps (> 0.4 Å) per 1000 atoms. |              |                                                       |
| Protein Geometry       | Poor rotamers                                                                 | 12           | 4.33% Goal: <0.3%                                     |
|                        | Favored rotamers                                                              | 252          | 90.97% Goal: >98%                                     |
|                        | Ramachandran outliers                                                         | 3            | 0.94% Goal: <0.05%                                    |
|                        | Ramachandran favored                                                          | 309          | 96.87% Goal: >98%                                     |
|                        | Rama distribution Z-score                                                     | -2.75 ± 0.42 | Goal: abs(Z score) < 2                                |
|                        | MolProbity score <sup>^</sup>                                                 | 1.25         | 99 <sup>th</sup> percentile* (N=12147, 1.90Å ± 0.25Å) |
|                        | Cβ deviations >0.25Å                                                          | 0            | 0.00% Goal: 0                                         |
|                        | Bad bonds:                                                                    | 0 / 2589     | 0.00% Goal: 0%                                        |
|                        | Bad angles:                                                                   | 25 / 3501    | 0.71% Goal: <0.1%                                     |
| Peptide Omegas         | Cis Prolines:                                                                 | 1 / 13       | 7.69% Expected: ≤1 per chain, or ≤5%                  |
|                        | Twisted Peptides:                                                             | 1 / 320      | 0.31% Goal: 0                                         |
| Additional validations | Chiral volume outliers                                                        | 0/398        |                                                       |
|                        | Waters with clashes                                                           | 0/0          | 0.00% See UnDowser table for details                  |

In the two column results, the left column gives the raw count, right column gives the percentage.

\* 100<sup>th</sup> percentile is the best among structures of comparable resolution; 0<sup>th</sup> percentile is the worst. For clashscore the comparative set of structures was selected in 2004, for MolProbity score in 2006.

<sup>^</sup> MolProbity score combines the clashscore, rotamer, and Ramachandran evaluations into a single score, normalized to be on the same scale as X-ray resolution.

Key to table colors and cutoffs here: [P](#)

**Figure S31.** Quality report for 1C9Y (OTC) after the energy minimization obtained from MolProbity.

### Summary statistics

|                        |                                                                               |              |                                                       |
|------------------------|-------------------------------------------------------------------------------|--------------|-------------------------------------------------------|
| All-Atom Contacts      | Clashscore, all atoms:                                                        | 0            | 100 <sup>th</sup> percentile* (N=331, 2.40Å ± 0.25Å)  |
|                        | Clashscore is the number of serious steric overlaps (> 0.4 Å) per 1000 atoms. |              |                                                       |
| Protein Geometry       | Poor rotamers                                                                 | 16           | 4.64% Goal: <0.3%                                     |
|                        | Favored rotamers                                                              | 299          | 86.67% Goal: >98%                                     |
|                        | Ramachandran outliers                                                         | 4            | 1.01% Goal: <0.05%                                    |
|                        | Ramachandran favored                                                          | 873          | 94.19% Goal: >98%                                     |
|                        | Rama distribution Z-score                                                     | -2.35 ± 0.36 | Goal: abs(Z score) < 2                                |
|                        | MolProbity score <sup>^</sup>                                                 | 1.40         | 100 <sup>th</sup> percentile* (N=8058, 2.40Å ± 0.25Å) |
|                        | Cβ deviations >0.25Å                                                          | 4            | 1.08% Goal: 0                                         |
|                        | Bad bonds:                                                                    | 0 / 3280     | 0.00% Goal: 0%                                        |
|                        | Bad angles:                                                                   | 23 / 4431    | 0.52% Goal: <0.1%                                     |
| Peptide Omegas         | Cis Prolines:                                                                 | 0 / 20       | 0.00% Expected: ≤1 per chain, or ≤5%                  |
|                        | Twisted Peptides:                                                             | 3 / 399      | 0.75% Goal: 0                                         |
| Additional validations | Chiral volume outliers                                                        | 0/479        |                                                       |
|                        | Waters with clashes                                                           | 0/0          | 0.00% See UnDowser table for details                  |

In the two column results, the left column gives the raw count, right column gives the percentage.

\* 100<sup>th</sup> percentile is the best among structures of comparable resolution; 0<sup>th</sup> percentile is the worst. For clashscore the comparative set of structures was selected in 2004, for MolProbity score in 2006.

<sup>^</sup> MolProbity score combines the clashscore, rotamer, and Ramachandran evaluations into a single score, normalized to be on the same scale as X-ray resolution.

Key to table colors and cutoffs here: [🔑](#)

**Figure S32.** Quality report for 2NZ2 (ASS) after the energy minimization obtained from MolProbity.

### Summary statistics

|                        |                                                                               |              |                                                        |
|------------------------|-------------------------------------------------------------------------------|--------------|--------------------------------------------------------|
| All-Atom Contacts      | Clashscore, all atoms:                                                        | 0.36         | 100 <sup>th</sup> percentile* (N=456, 2.20Å ± 0.25Å)   |
|                        | Clashscore is the number of serious steric overlaps (> 0.4 Å) per 1000 atoms. |              |                                                        |
| Protein Geometry       | Poor rotamers                                                                 | 9            | 1.23% Goal: <0.3%                                      |
|                        | Favored rotamers                                                              | 705          | 96.05% Goal: >98%                                      |
|                        | Ramachandran outliers                                                         | 0            | 0.00% Goal: <0.05%                                     |
|                        | Ramachandran favored                                                          | 808          | 96.42% Goal: >98%                                      |
|                        | Rama distribution Z-score                                                     | -0.65 ± 0.28 | Goal: abs(Z score) < 2                                 |
|                        | MolProbity score <sup>^</sup>                                                 | 0.93         | 100 <sup>th</sup> percentile* (N=10167, 2.20Å ± 0.25Å) |
|                        | Cβ deviations >0.25Å                                                          | 0            | 0.00% Goal: 0                                          |
|                        | Bad bonds:                                                                    | 9 / 7188     | 0.13% Goal: 0%                                         |
|                        | Bad angles:                                                                   | 60 / 9786    | 0.61% Goal: <0.1%                                      |
| Peptide Omegas         | Cis Prolines:                                                                 | 2 / 48       | 4.17% Expected: ≤1 per chain, or ≤5%                   |
|                        | Twisted Peptides:                                                             | 1 / 840      | 0.12% Goal: 0                                          |
| Additional validations | Chiral handedness swaps                                                       | 1/880        | 0.11% See Chiral volume report for details             |
|                        | Waters with clashes                                                           | 0/0          | 0.00% See UnDowser table for details                   |

In the two column results, the left column gives the raw count, right column gives the percentage.

\* 100<sup>th</sup> percentile is the best among structures of comparable resolution; 0<sup>th</sup> percentile is the worst. For clashscore the comparative set of structures was selected in 2004, for MolProbity score in 2006.

<sup>^</sup> MolProbity score combines the clashscore, rotamer, and Ramachandran evaluations into a single score, normalized to be on the same scale as X-ray resolution.

Key to table colors and cutoffs here: [🔑](#)

**Figure S33.** Quality report for 3E7G (iNOS) after the energy minimization obtained from MolProbity.

### Summary statistics

|                        |                                                                               |              |                                                       |
|------------------------|-------------------------------------------------------------------------------|--------------|-------------------------------------------------------|
| All-Atom Contacts      | Clashscore, all atoms:                                                        | 1.11         | 100 <sup>th</sup> percentile* (N=777, 1.86Å ± 0.25Å)  |
|                        | Clashscore is the number of serious steric overlaps (> 0.4 Å) per 1000 atoms. |              |                                                       |
| Protein Geometry       | Poor rotamers                                                                 | 2            | 1.06% Goal: <0.3%                                     |
|                        | Favored rotamers                                                              | 181          | 95.77% Goal: >98%                                     |
|                        | Ramachandran outliers                                                         | 1            | 0.44% Goal: <0.05%                                    |
|                        | Ramachandran favored                                                          | 217          | 95.18% Goal: >98%                                     |
|                        | Rama distribution Z-score                                                     | -1.91 ± 0.51 | Goal: abs(Z score) < 2                                |
|                        | MolProbity score <sup>^</sup>                                                 | 1.17         | 99 <sup>th</sup> percentile* (N=11957, 1.86Å ± 0.25Å) |
|                        | Cβ deviations >0.25Å                                                          | 0            | 0.00% Goal: 0                                         |
|                        | Bad bonds:                                                                    | 0 / 1875     | 0.00% Goal: 0%                                        |
|                        | Bad angles:                                                                   | 11 / 2558    | 0.43% Goal: <0.1%                                     |
| Peptide Omegas         | Cis Prolines:                                                                 | 0 / 18       | 0.00% Expected: ≤1 per chain, or ≤5%                  |
| Additional validations | Chiral volume outliers                                                        | 0/273        |                                                       |
|                        | Waters with clashes                                                           | 0/0          | 0.00% See UnDowser table for details                  |

In the two column results, the left column gives the raw count, right column gives the percentage.

\* 100<sup>th</sup> percentile is the best among structures of comparable resolution; 0<sup>th</sup> percentile is the worst. For clashscore the comparative set of structures was selected in 2004, for MolProbity score in 2006.

<sup>^</sup> MolProbity score combines the clashscore, rotamer, and Ramachandran evaluations into a single score, normalized to be on the same scale as X-ray resolution.

Key to table colors and cutoffs here: [🔑](#)

**Figure S34.** Quality report for 3ORH (GAMT) after the energy minimization obtained from MolProbity.

### Summary statistics

|                         |                                                                               |              |                                                      |
|-------------------------|-------------------------------------------------------------------------------|--------------|------------------------------------------------------|
| All-Atom Contacts       | Clashscore, all atoms:                                                        | 1.54         | 100 <sup>th</sup> percentile* (N=37, 3Å - 9999Å)     |
|                         | Clashscore is the number of serious steric overlaps (> 0.4 Å) per 1000 atoms. |              |                                                      |
| Protein Geometry        | Poor rotamers                                                                 | 30           | 9.23% Goal: <0.3%                                    |
|                         | Favored rotamers                                                              | 249          | 76.62% Goal: >98%                                    |
|                         | Ramachandran outliers                                                         | 1            | 0.28% Goal: <0.05%                                   |
|                         | Ramachandran favored                                                          | 326          | 90.30% Goal: >98%                                    |
|                         | Rama distribution Z-score                                                     | -3.12 ± 0.37 | Goal: abs(Z score) < 2                               |
|                         | MolProbity score <sup>^</sup>                                                 | 2.17         | 100 <sup>th</sup> percentile* (N=342, 3.50Å ± 0.25Å) |
|                         | Cβ deviations >0.25Å                                                          | 8            | 2.38% Goal: 0                                        |
|                         | Bad bonds:                                                                    | 0 / 2991     | 0.00% Goal: 0%                                       |
|                         | Bad angles:                                                                   | 38 / 4027    | 0.94% Goal: <0.1%                                    |
| Peptide Omegas          | Cis Prolines:                                                                 | 1 / 18       | 5.56% Expected: ≤1 per chain, or ≤5%                 |
|                         | Twisted Peptides:                                                             | 3 / 363      | 0.83% Goal: 0                                        |
| Low-resolution Criteria | CaBLAM outliers                                                               | 15           | 4.2% Goal: <1.0%                                     |
|                         | CA Geometry outliers                                                          | 3            | 0.84% Goal: <0.5%                                    |
| Additional validations  | Chiral volume outliers                                                        | 0/429        |                                                      |
|                         | Waters with clashes                                                           | 0/0          | 0.00% See UnDowser table for details                 |

In the two column results, the left column gives the raw count, right column gives the percentage.

\* 100<sup>th</sup> percentile is the best among structures of comparable resolution; 0<sup>th</sup> percentile is the worst. For clashscore the comparative set of structures was selected in 2004, for MolProbity score in 2006.

<sup>^</sup> MolProbity score combines the clashscore, rotamer, and Ramachandran evaluations into a single score, normalized to be on the same scale as X-ray resolution.

Key to table colors and cutoffs here: [P](#)

**Figure S35.** Quality report for 1I0E (CKU) after the energy minimization obtained from MolProbity.

As can be observed from the quality reports, some parameters improved after the energy minimization in UCSF Chimera. After this, we decided to proceed to the identification of the docking site. It is noteworthy that despite the improvement in the parameters not being large, the clashscore, the poor rotamers, and the favored rotamers, among other parameters, were better after the energy minimization. We tried to increase the steepest descent steps to >1000, but contrary to our expectations, the quality became worse. For this reason, we decided to perform the molecular docking simulations with these targets and test their quality in the molecular docking validation process.

### • Identification of the docking site

In order to perform the molecular docking simulations, we needed to establish our docking sites. For this purpose, we searched for amino acid residues present in the active sites of the selected targets. First, we performed the search in UniProt, where we collected the reported amino acid residues in the function section. Additionally, to better delimitate the active site, we performed the prediction of pockets for our targets in the DoGSiteScorer tool. We chose those pockets that accomplished two characteristics: 1) the pocket selected had to include the amino acid residues reported in UniProt, and 2) we selected the pocket with the best drug score. Below, we show the selected pockets for our candidate targets.

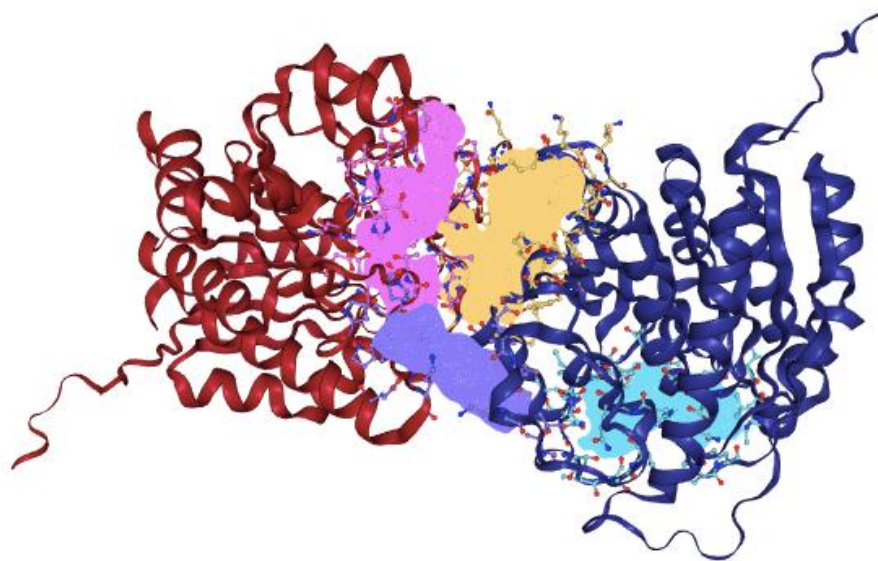

**Figure S36.** Predicted pockets for ARG1 using DoGSiteScorer.

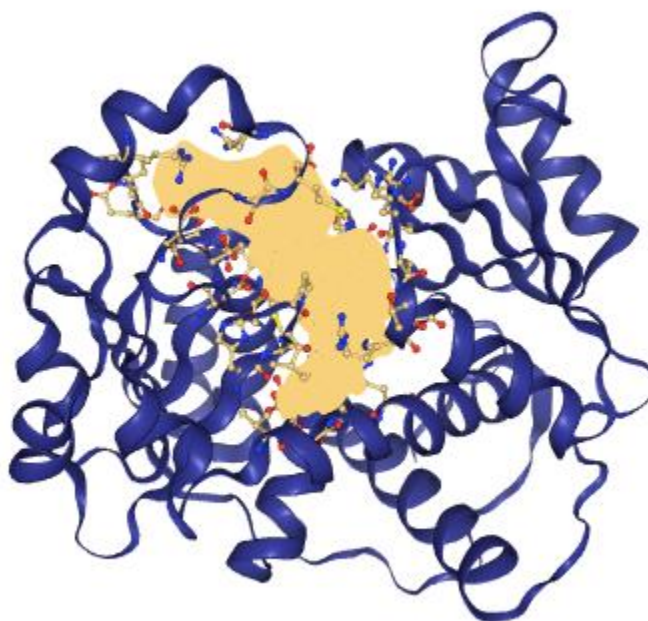

**Figure S37.** Predicted pockets for OTC using DoGSiteScorer.



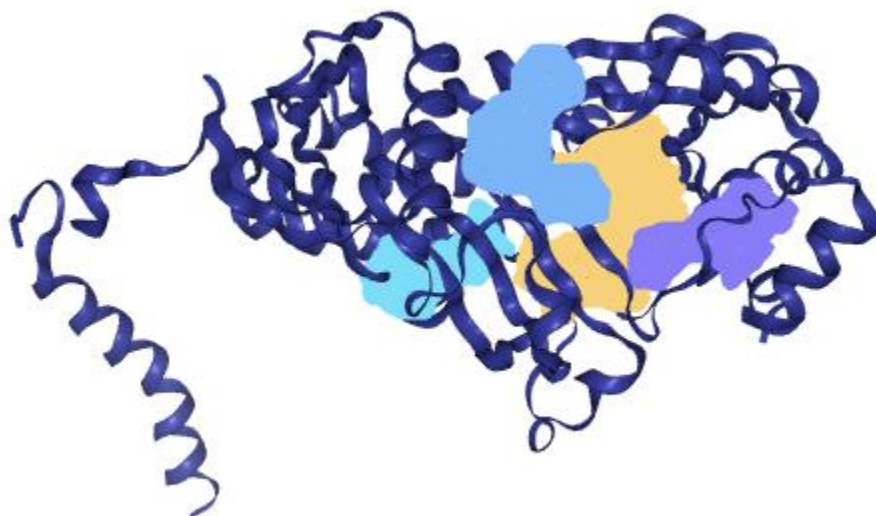

**Figure S38.** Predicted pockets for ASS using DoGSiteScorer.

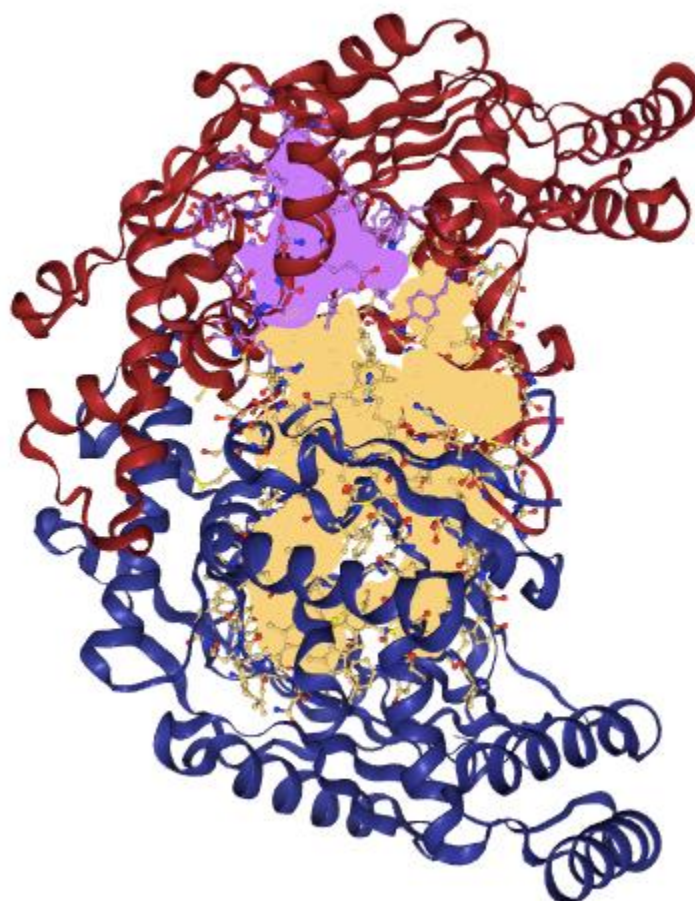

**Figure S39.** Predicted pockets for iNOS using DoGSiteScorer.

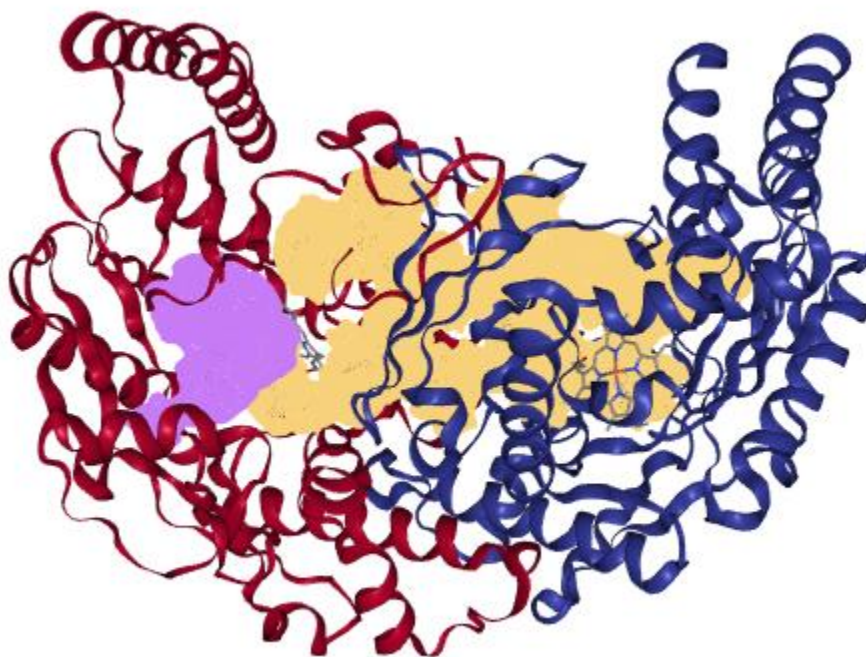

**Figure S40.** Predicted pockets for eNOS using DoGSiteScorer.

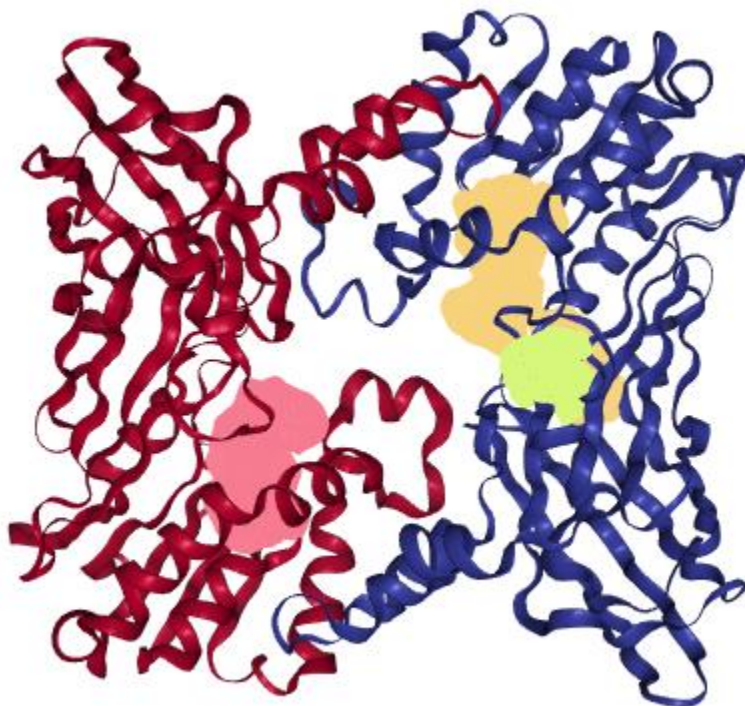

**Figure S41.** Predicted pockets for PRMT1 using DoGSiteScorer.

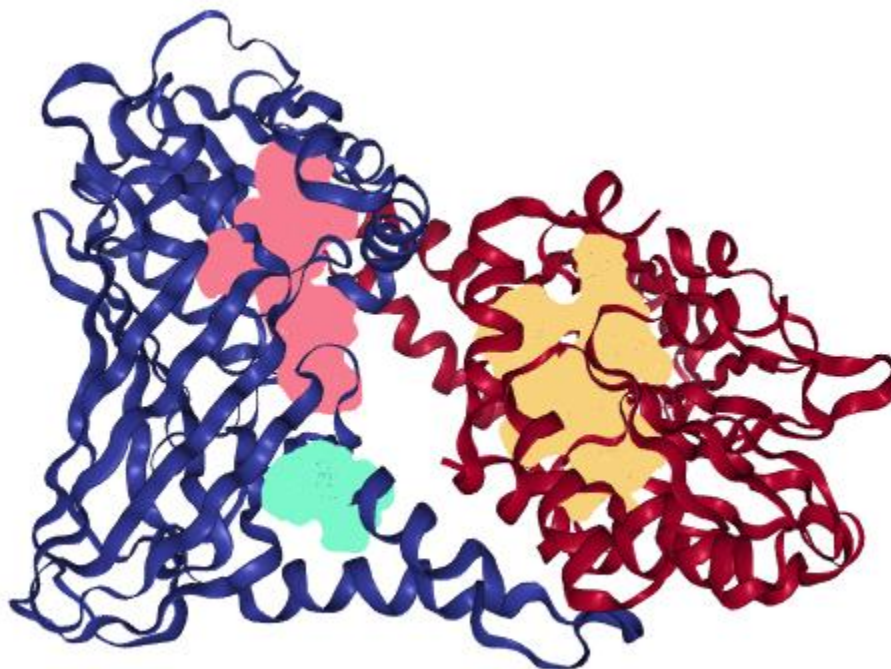

**Figure S42.** Predicted pockets for PRMT4 using DoGSiteScorer.

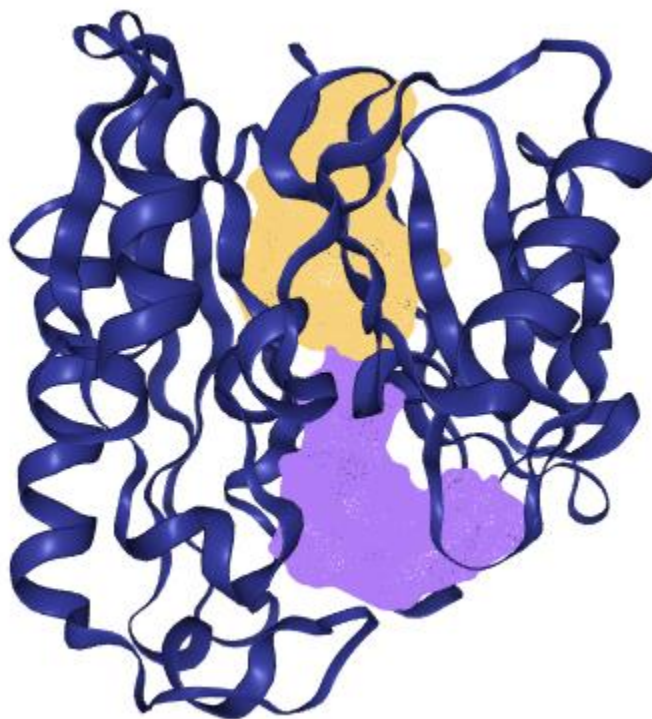

**Figure S43.** Predicted pockets for DDAH1 using DoGSiteScorer.



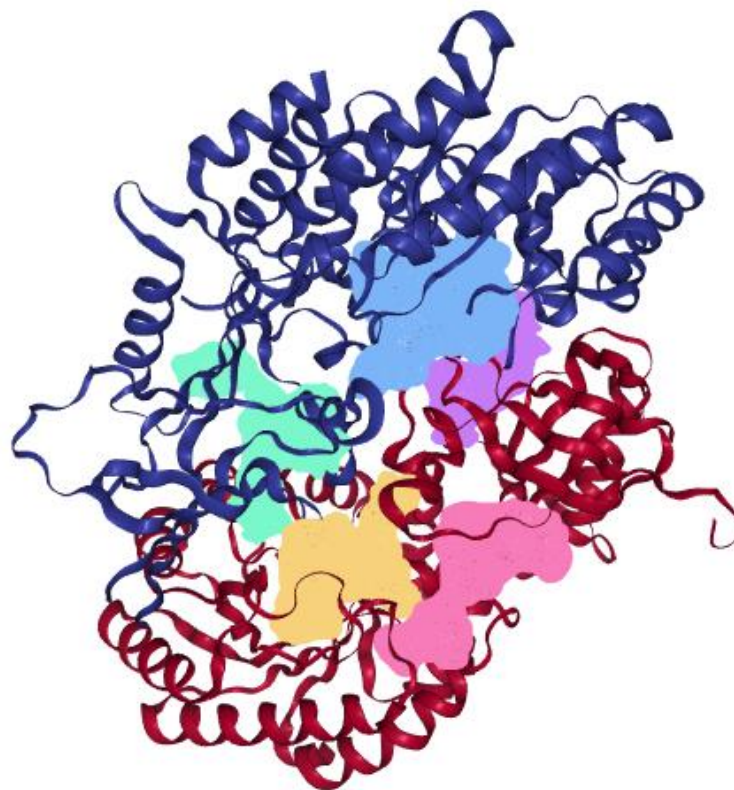

**Figure S44.** Predicted pockets for ODC using DoGSiteScorer.

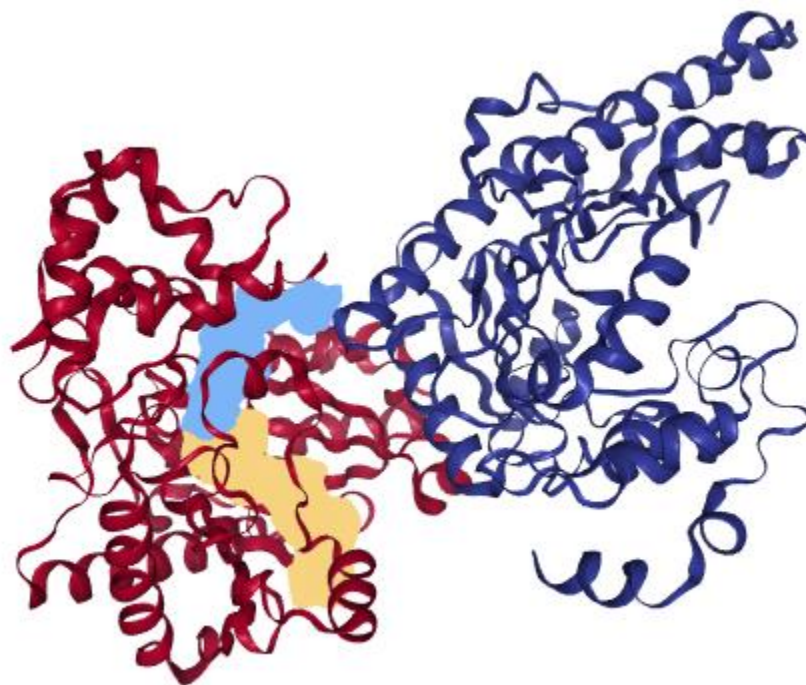

**Figure S45.** Predicted pockets for CKB using DoGSiteScorer.

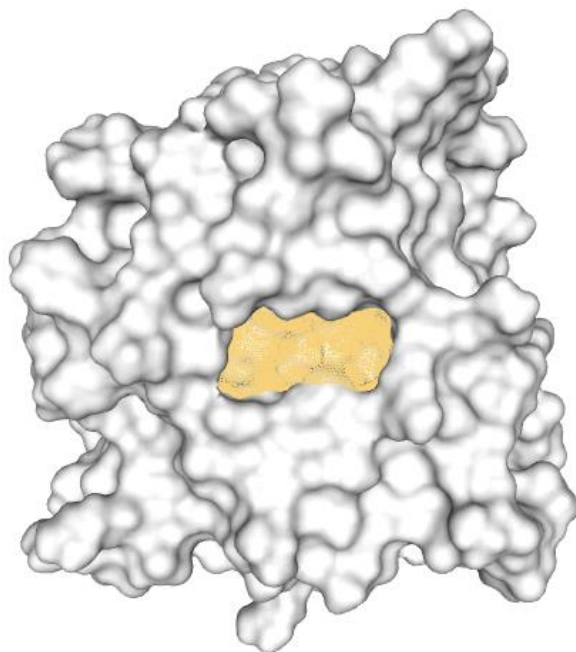

**Figure S46.** Predicted pockets for ARG2 using DoGSiteScorer.

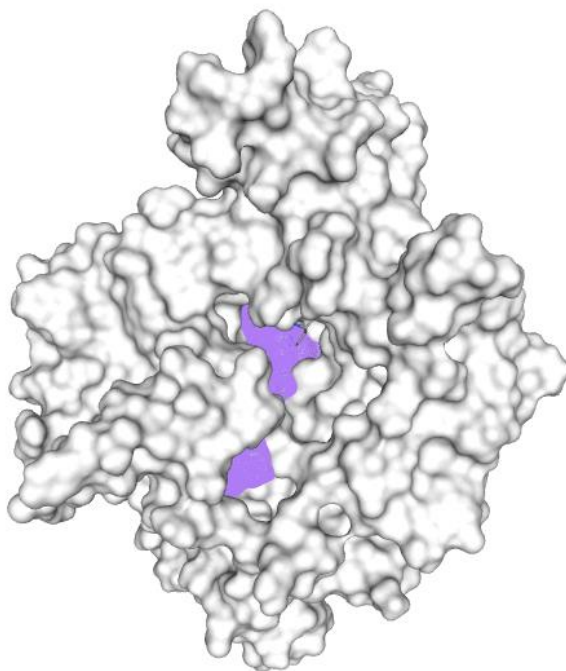

**Figure S47.** Predicted pockets for nNOS using DoGSiteScorer.

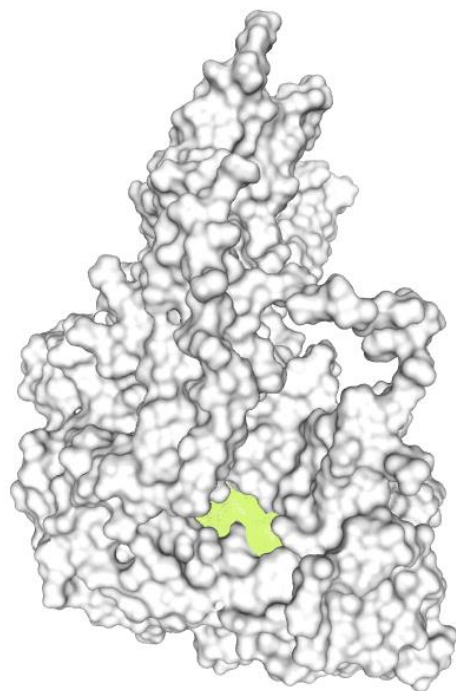

**Figure S48.** Predicted pockets for DAO using DoGSiteScorer.

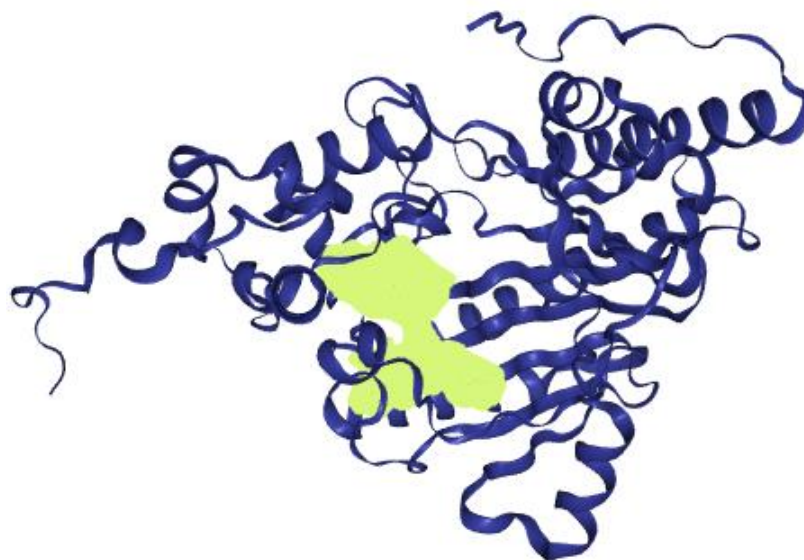

**Figure S49.** Predicted pockets for CKU using DoGSiteScorer.

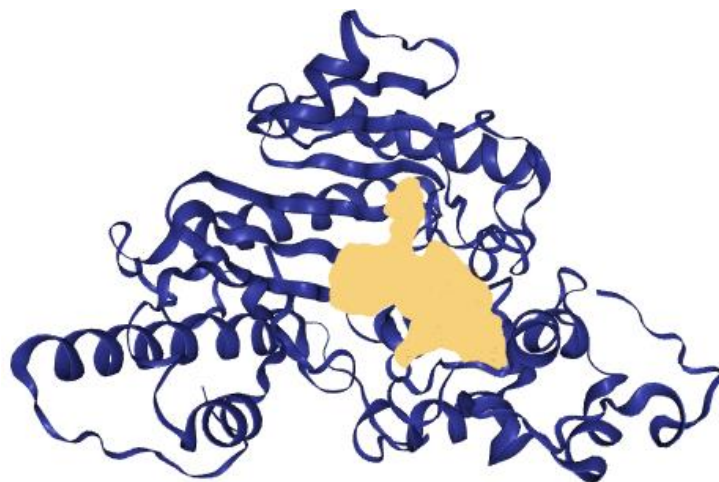

**Figure S50.** Predicted pockets for CKM using DoGSiteScorer.

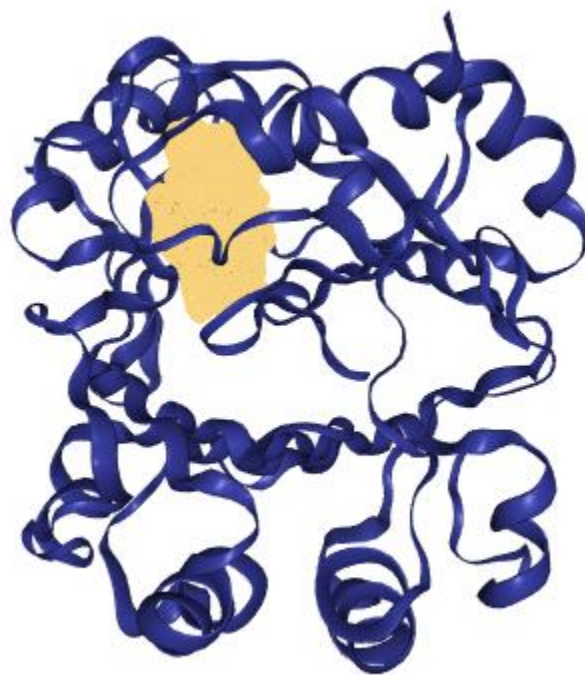

**Figure S51.** Predicted pockets for CASTOR1 using DoGSiteScorer.



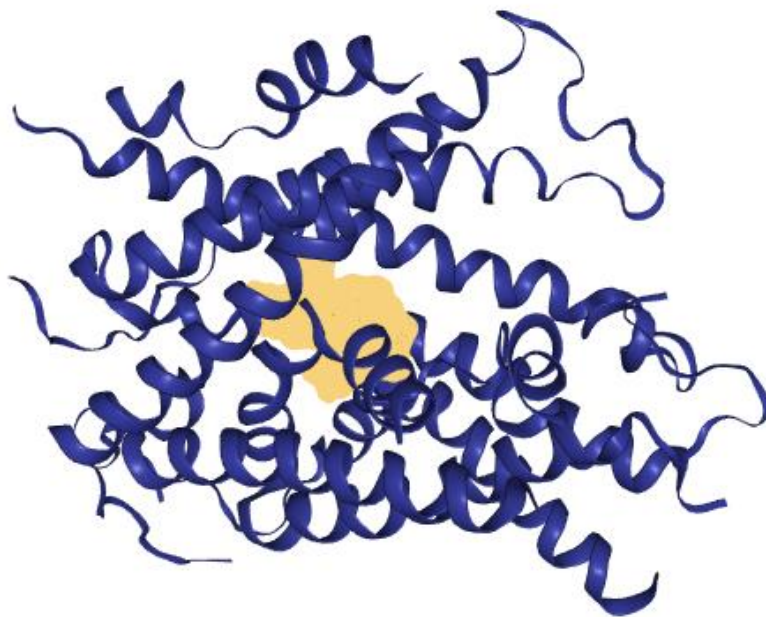

**Figure S52.** Predicted pockets for SLC38A9 using DoGSiteScorer.

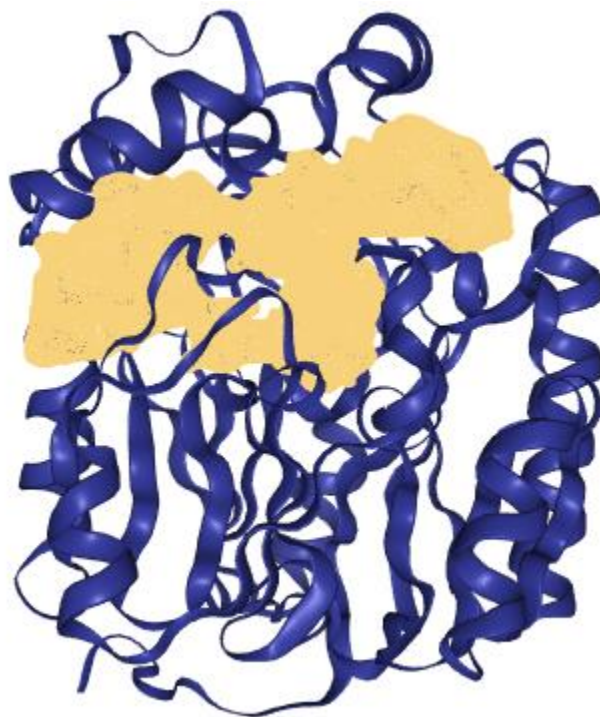

**Figure S53.** Predicted pockets for AGAT using DoGSiteScorer.

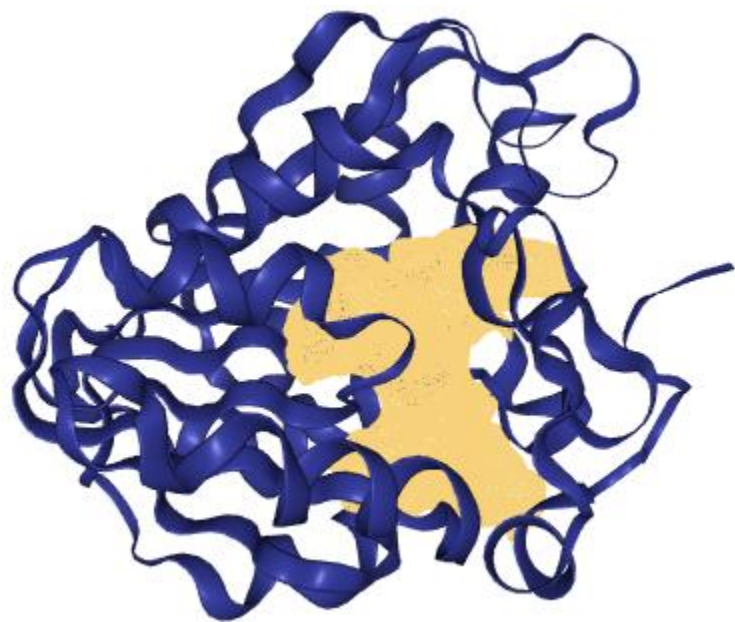

**Figure S54.** Predicted pockets for GAMT using DoGSiteScorer.

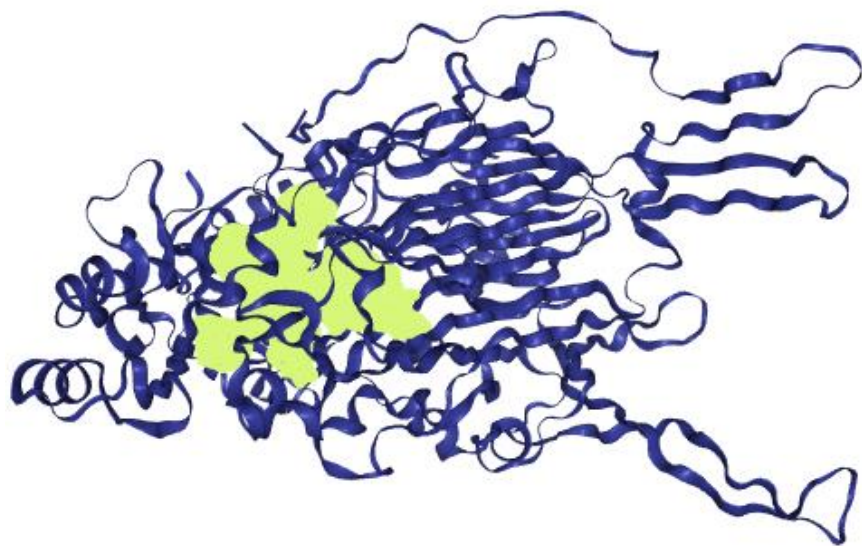

**Figure S55.** Predicted pockets for DAO using DoGSiteScorer.

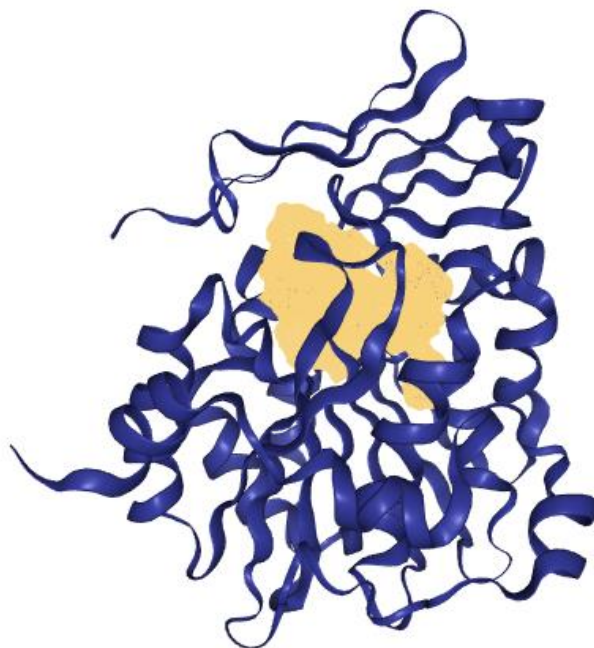

**Figure S56.** Predicted pockets for SPDS using DoGSiteScorer.

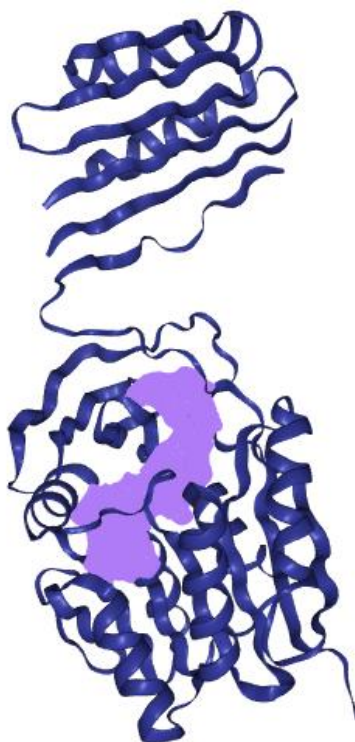

**Figure S57.** Predicted pockets for SPMS using DoGSiteScorer.

- **Validation of the molecular docking methodology**

Once we identified the docking site for our candidate targets, we performed the validation of the molecular docking methodology by employing the redocking method. In Supplementary Material part C, we report the

parameters employed in defining the grid box during the validation process. Our docking simulations were carried out in AutoDock 4.2 in a rigid modality. In the redocking method, we followed our established methodology, employing selected candidate targets and their corresponding crystallized ligands to perform the simulation. After the simulation, we performed a comparison between our simulated conformation and the crystallized conformation of the original ligand in UCSF Chimera. The coordinates employed in docking simulations are shown below, including the RMSD values in those validated targets.

**Table S2.** 3D coordinates and sizes for the grid boxes employed in the docking simulations

| Target  | Grid box Size |    |    | Grid box Coordinates |         |         | RMSD for the redocked ligand |
|---------|---------------|----|----|----------------------|---------|---------|------------------------------|
|         | X             | Y  | Z  | X                    | Y       | Z       |                              |
| ARG1    | 38            | 40 | 30 | 2.08                 | 22.624  | -11.323 | NV                           |
| ARG2    | 34            | 34 | 34 | 35.198               | 89.007  | 68.774  | 4.603                        |
| OTC     | 30            | 20 | 20 | 3.923                | 2.994   | -22.584 | 1.269                        |
| ASS     | 30            | 38 | 30 | 3.147                | 37.218  | 18.577  | 3.391                        |
| iNOS    | 24            | 26 | 38 | 56.623               | 20.285  | 79.908  | 2.107                        |
| eNOS    | 40            | 40 | 40 | 18.814               | 243.469 | 24.373  | 1.516                        |
| nNOS    | 36            | 34 | 36 | 230.156              | 28.582  | 11.324  | 2.08                         |
| PRMT1   | 40            | 40 | 40 | -4.725               | 36.708  | -14.904 | 1.083                        |
| PRMT4   | 40            | 40 | 40 | -16.476              | 21.323  | 13.604  | 1.27                         |
| DDAH1   | 40            | 40 | 40 | 24.179               | -5.728  | 45.845  | NV                           |
| ODC     | 40            | 40 | 40 | 9.372                | -3.213  | 60.512  | 3.245                        |
| CKB     |               |    |    |                      |         |         |                              |
| CKU     | 48            | 34 | 44 | 49.427               | 17.144  | 104.641 | NV                           |
| CKM     | 58            | 44 | 54 | 1.013                | 15.828  | 91.566  | NV                           |
| GAMT    | 40            | 48 | 40 | 64.371               | 62.13   | 14.016  | 1.249                        |
| AGAT    | 44            | 44 | 44 | 47.049               | 65.583  | 13.552  | NV                           |
| CASTOR1 | 40            | 40 | 40 | 48.822               | 81.527  | 80.321  | 1.101                        |
| SLC38A9 | 28            | 28 | 28 | -54.894              | 35.9    | 70.782  | 4.314                        |
| DAO     | 46            | 42 | 44 | -32.828              | -11.041 | 73.498  | 1.403                        |
| SPMS    | 20            | 32 | 20 | 6.611                | 67.642  | 0.787   | 1.667                        |
| SPDS    | 20            | 32 | 32 | 14.314               | 26.303  | 10.686  | 2.084                        |

NV: Not validated.

Some targets could not be validated because their original PDB files did not include a ligand to perform the redocking method. However, we still selected the grid box based on UniProt information and DoGSiteScorer, performed the simulations, and compared our results with the scientific literature to test if our methodology was generating reliable results.

- **Binding modes of biguanides and candidate metabolites in the docked targets**

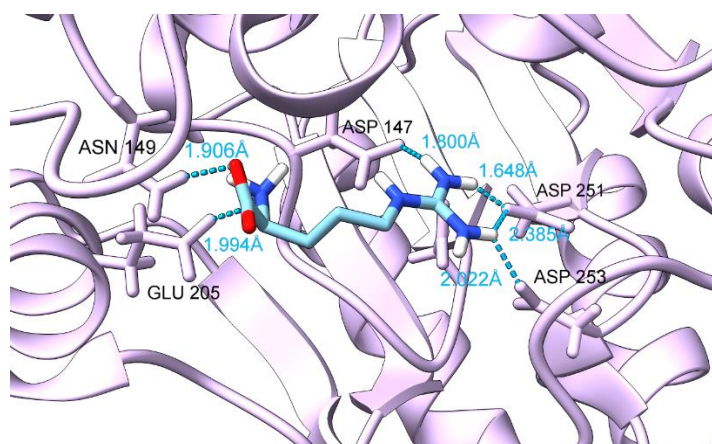



**Figure S58.** Predicted binding mode of L-arginine in ARG2.

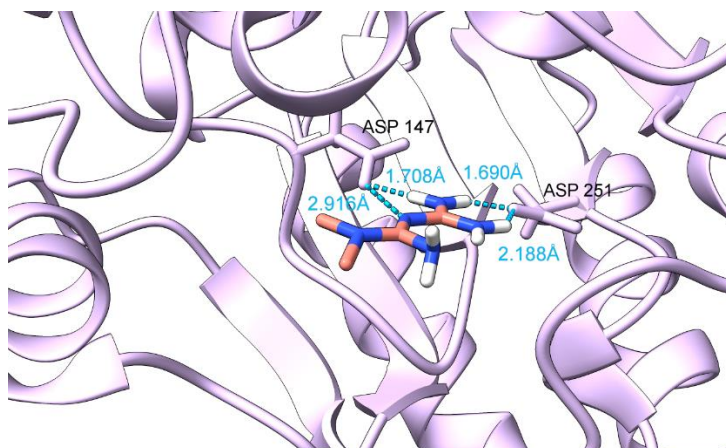

**Figure S59.** Predicted binding mode of metformin in ARG2.

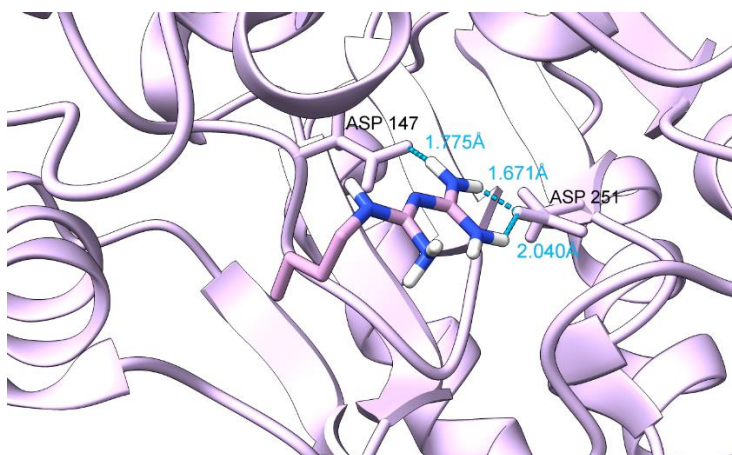

**Figure S60.** Predicted binding mode of buformin in ARG2.

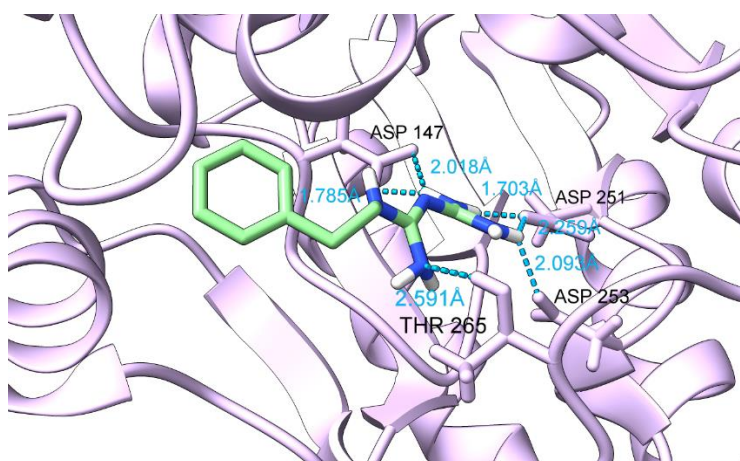

**Figure S61.** Predicted binding mode of phenformin in ARG2.

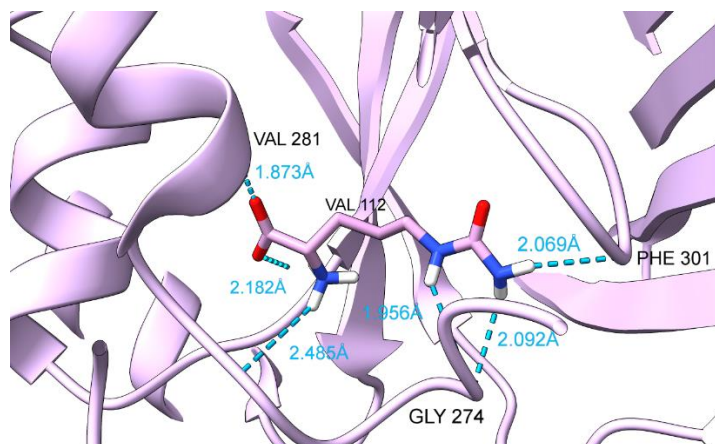

**Figure S62.** Predicted binding mode of L-citrulline in CASTOR1.

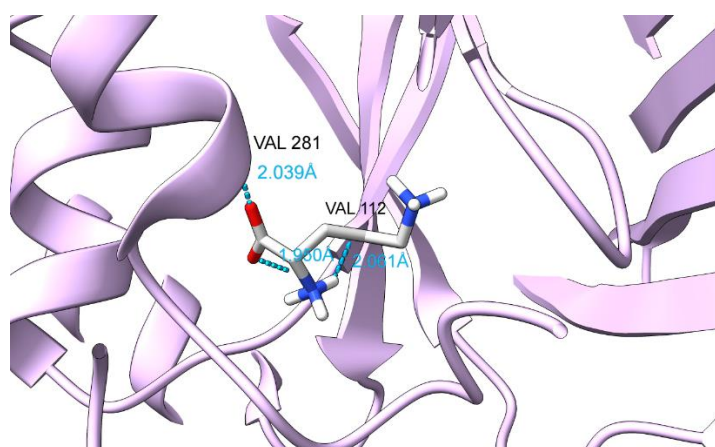

**Figure S63.** Predicted binding mode of L-ornithine in CASTOR1.

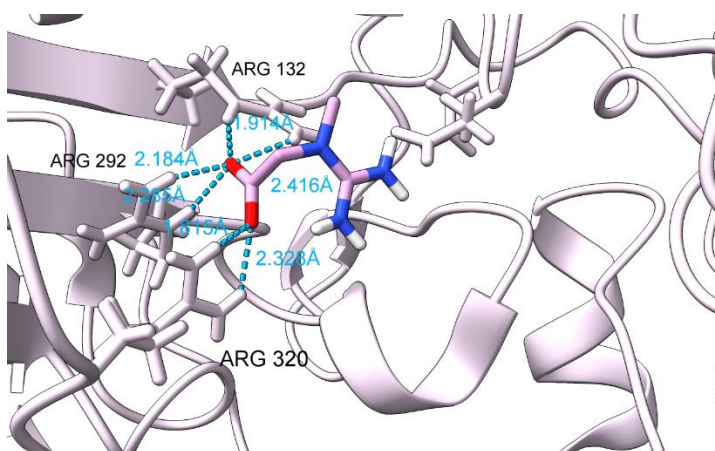

**Figure S64.** Predicted binding mode of creatine in M-type creatine kinase.

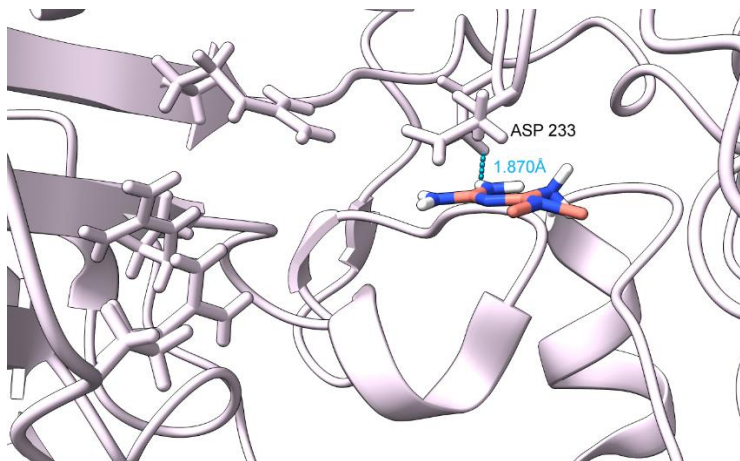

**Figure S65.** Predicted binding mode of metformin in M-type creatine kinase.

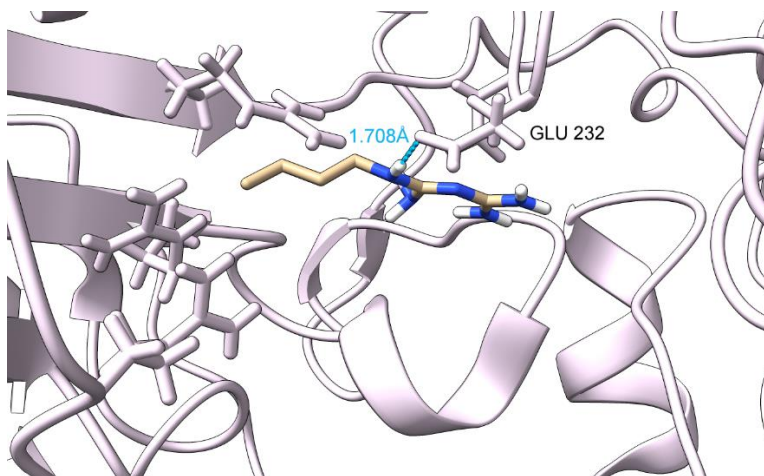

**Figure S66.** Predicted binding mode of buformin in M-type creatine kinase.

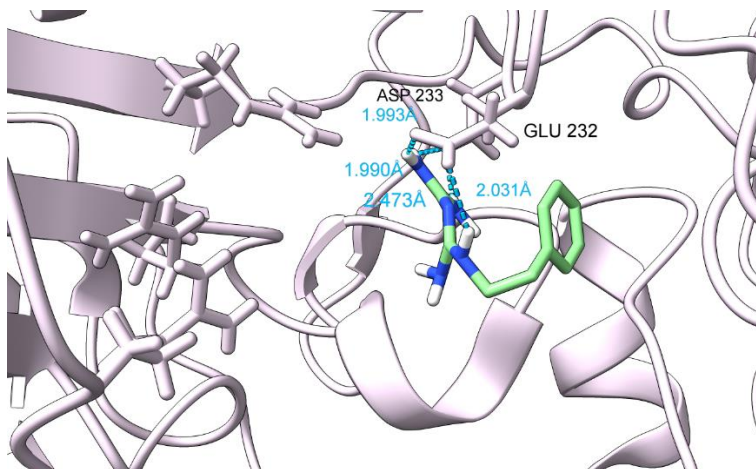

**Figure S67.** Predicted binding mode of phenformin in M-type creatine kinase.



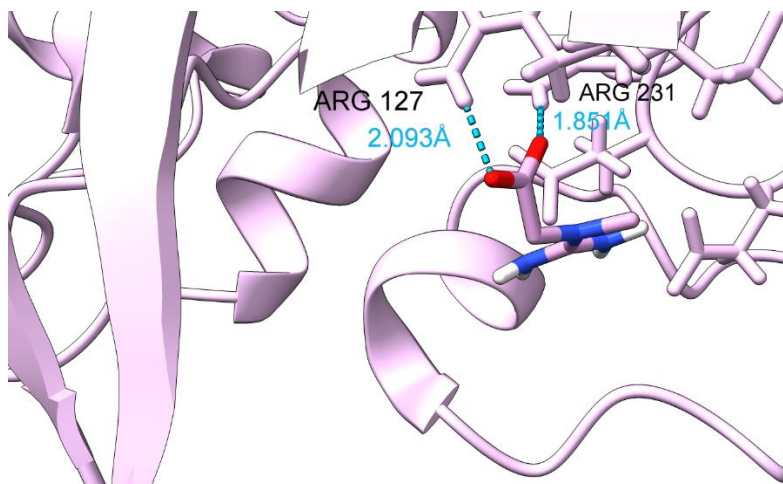

**Figure S68.** Predicted binding mode of creatine in the ubiquitous creatine kinase.

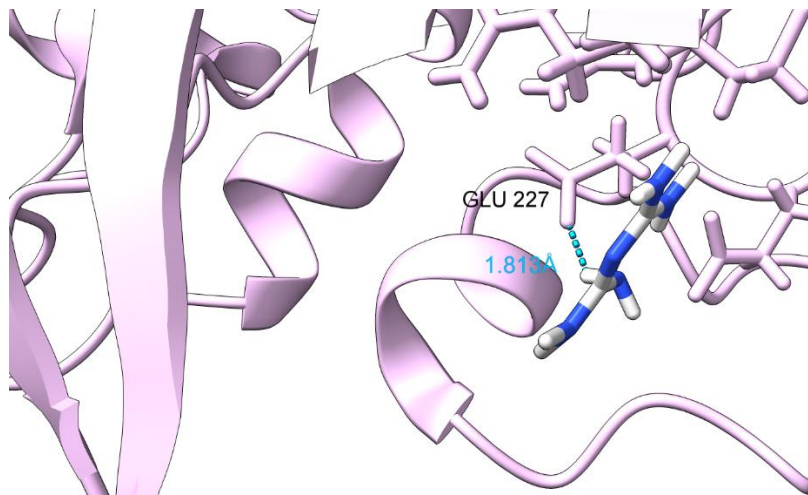

**Figure S69.** Predicted binding mode of metformin in the ubiquitous creatine kinase.

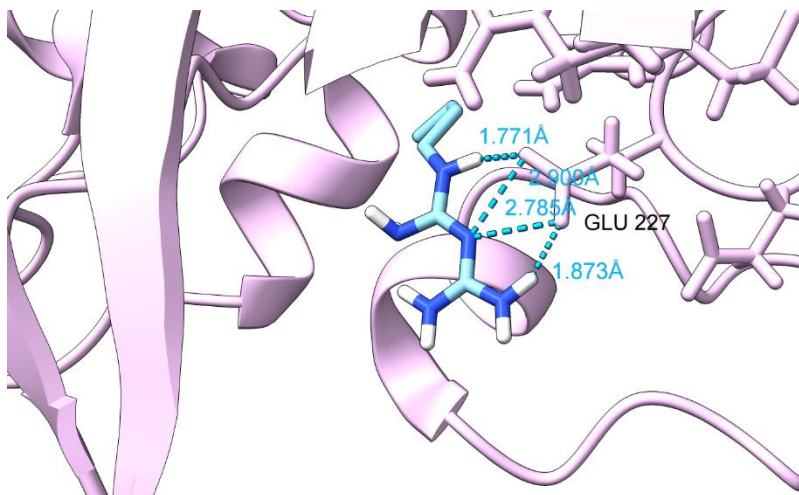

**Figure S70.** Predicted binding mode of buformin in the ubiquitous creatine kinase.

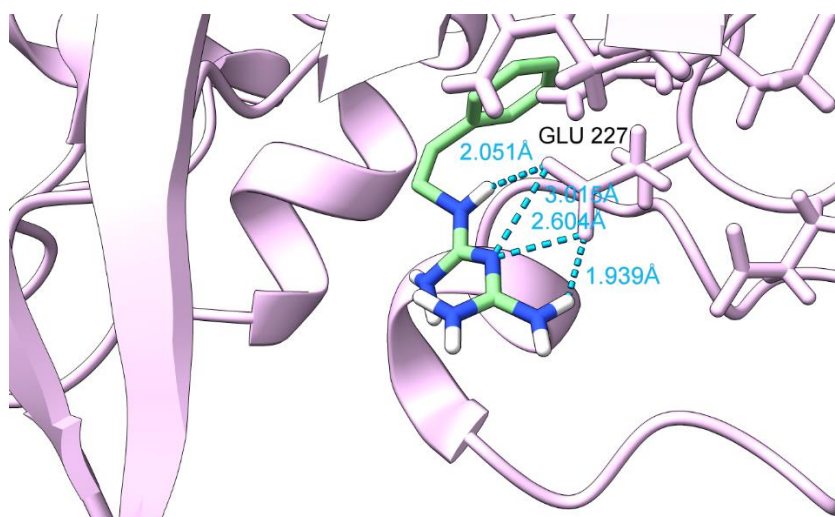

**Figure S71.** Predicted binding mode of phenformin in the ubiquitous creatine kinase.

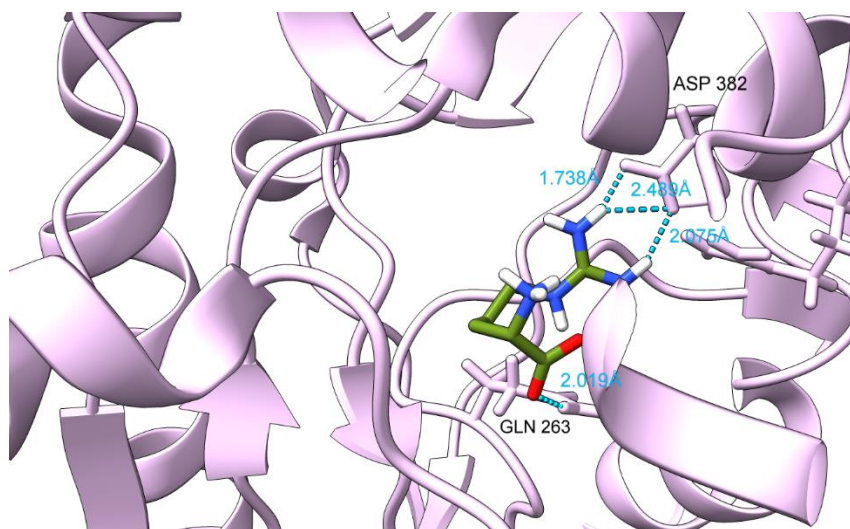

**Figure S72.** Predicted binding mode of L-arginine in iNOS.

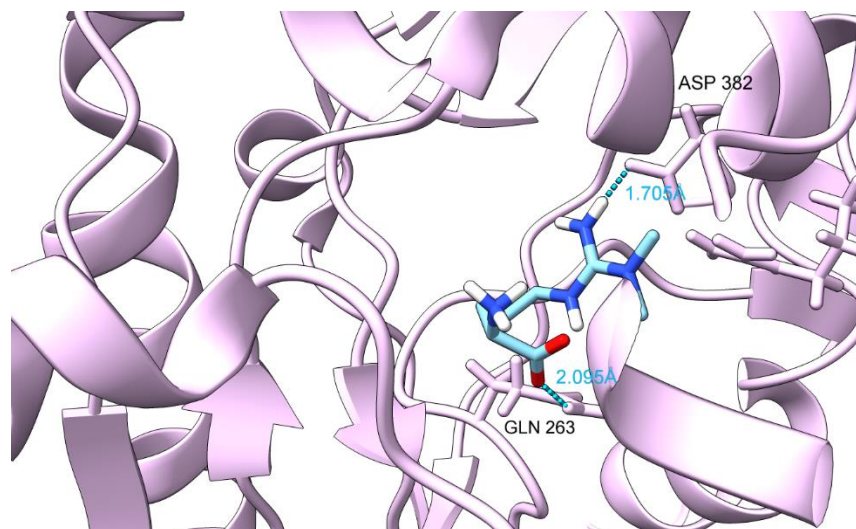

**Figure S73.** Predicted binding mode of ADMA in iNOS.

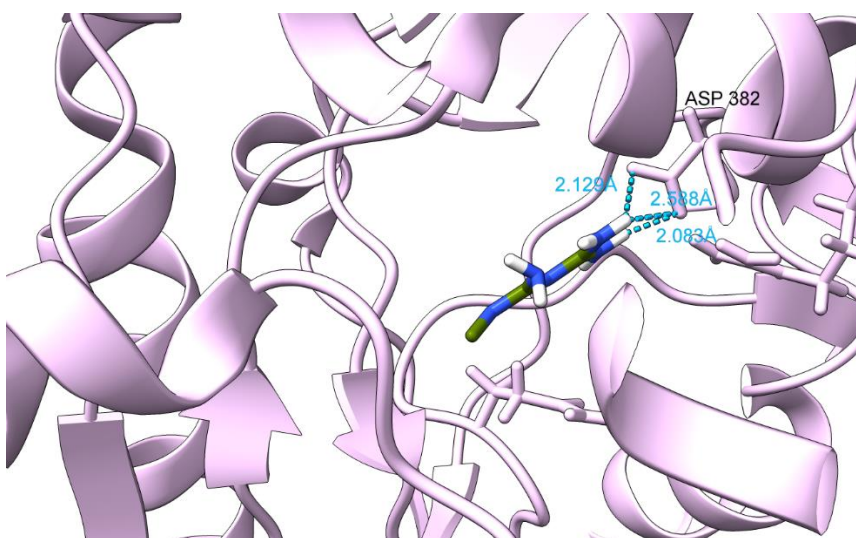

**Figure S74.** Predicted binding mode of metformin in iNOS.

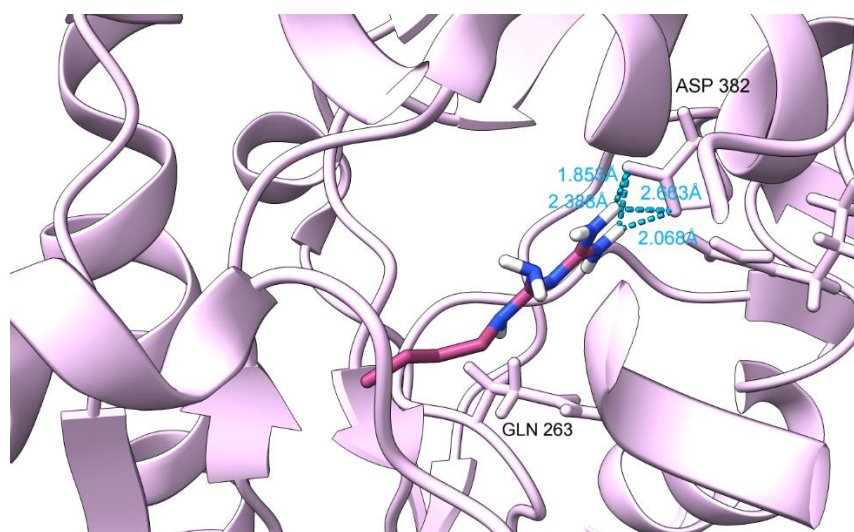

**Figure S75.** Predicted binding mode of buformin in iNOS.

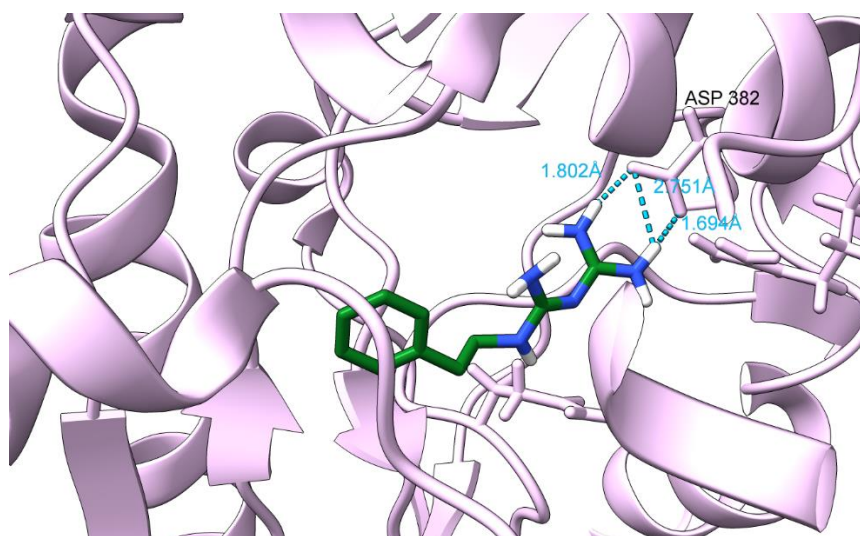

**Figure S76.** Predicted binding mode of phenformin in iNOS.



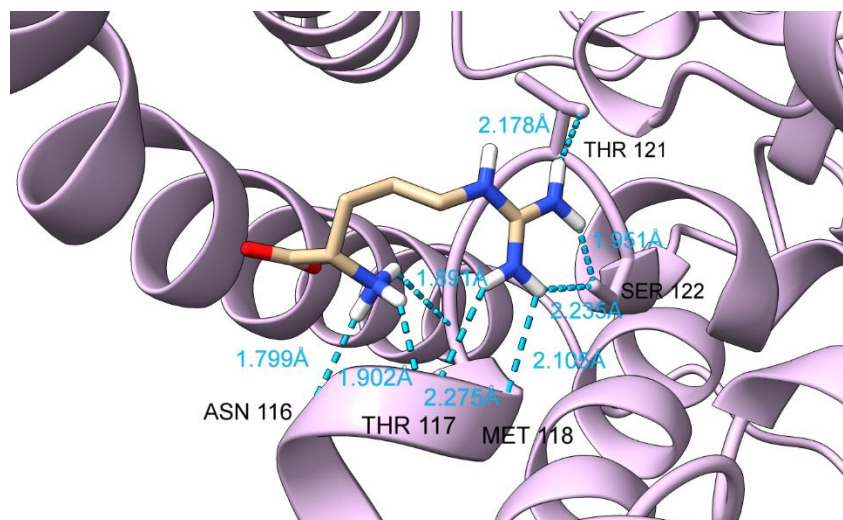

**Figure S77.** Predicted binding mode of L-arginine in SLC38A9.

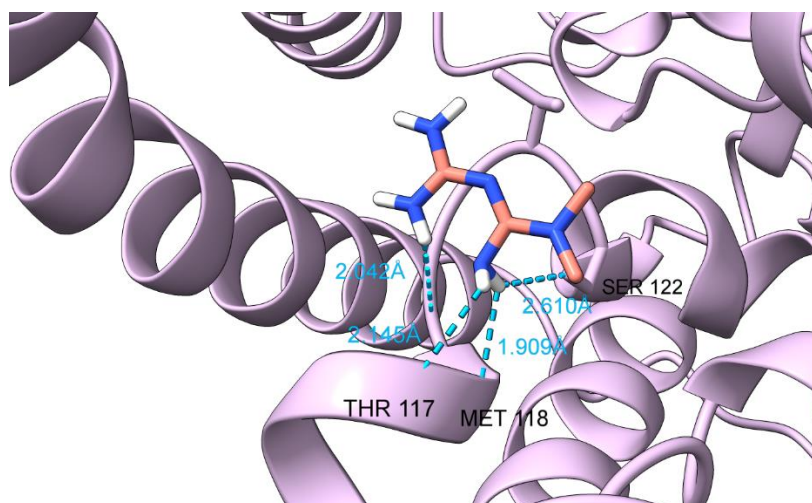

**Figure S78.** Predicted binding mode of metformin in SLC38A9.



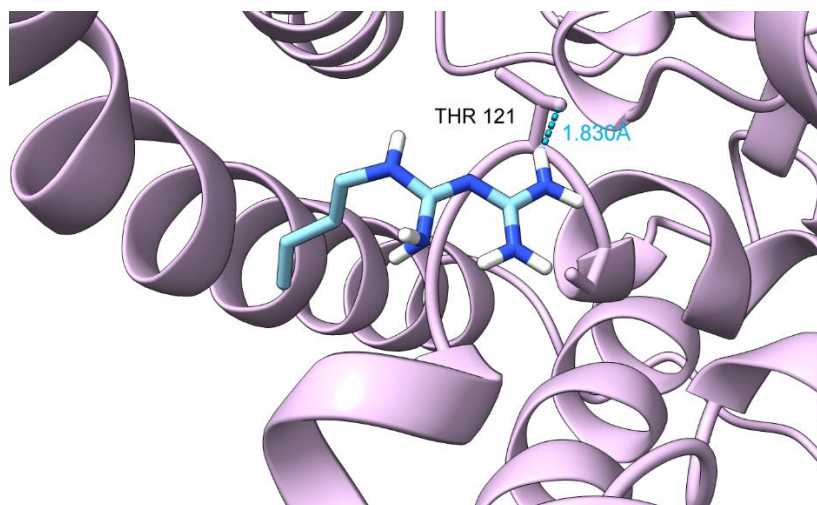

**Figure S79.** Predicted binding mode of buformin in SLC38A9.

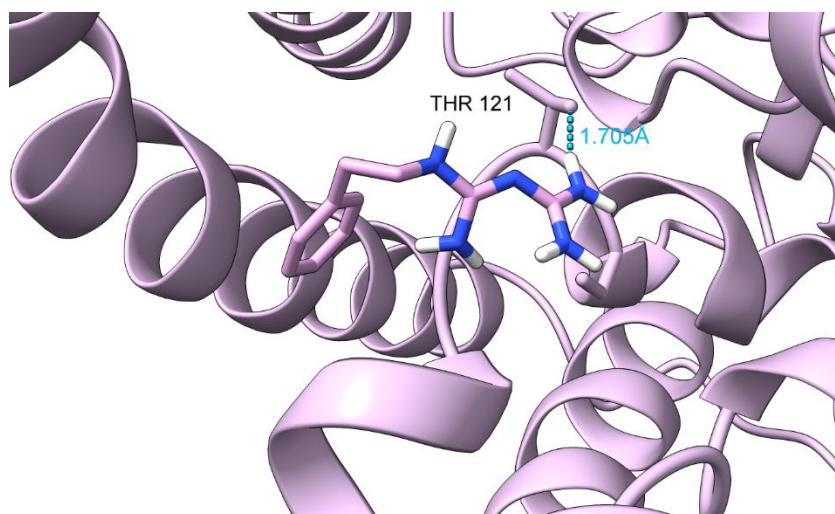

**Figure S80.** Predicted binding mode of phenformin in SLC38A9.

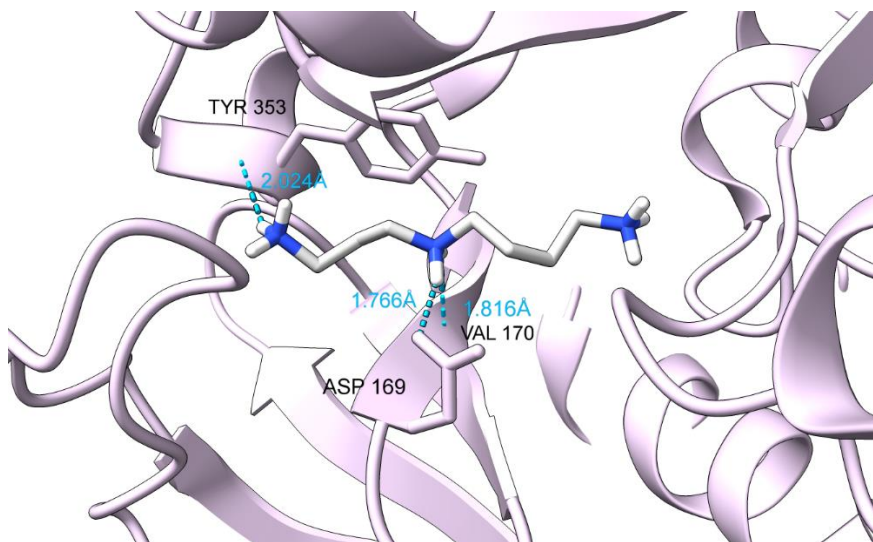

**Figure S81.** Predicted binding mode of spermidine in SPMS.

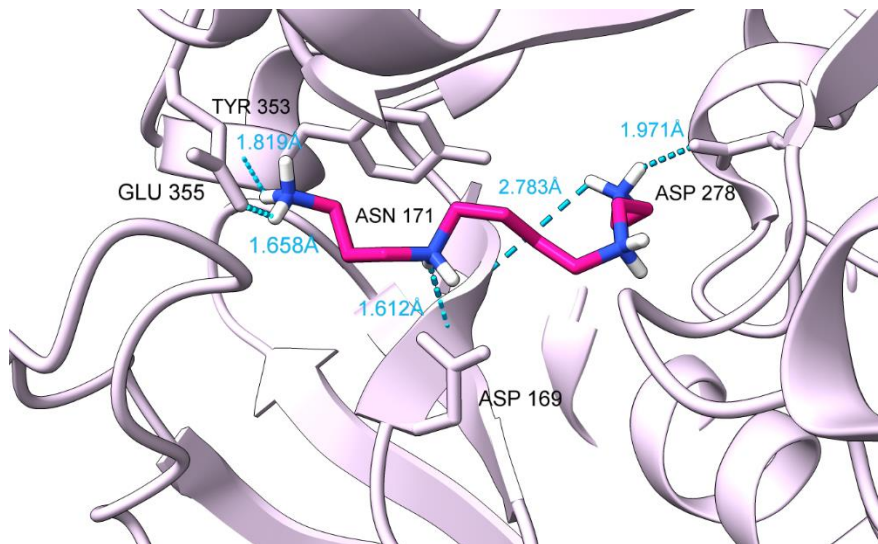

**Figure S82.** Predicted binding mode of spermine in SPMS.

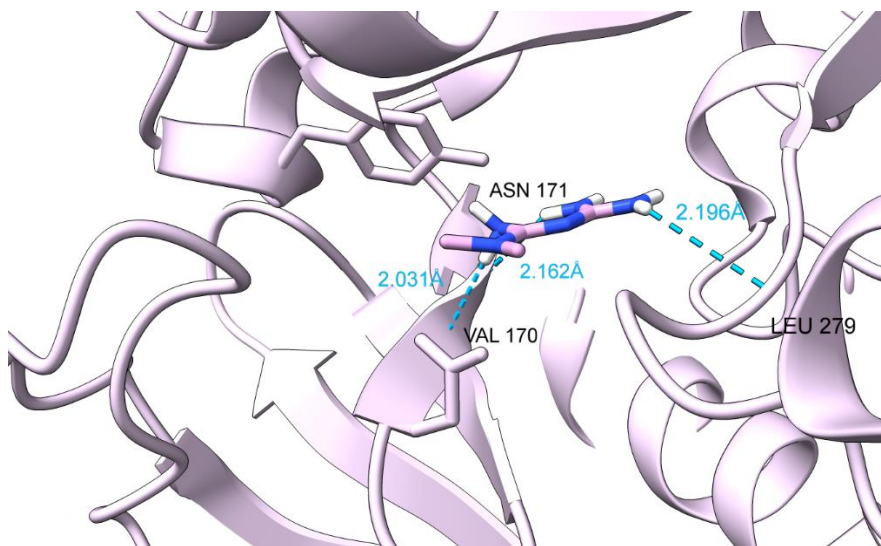

**Figure S83.** Predicted binding mode of metformin in SPMS.

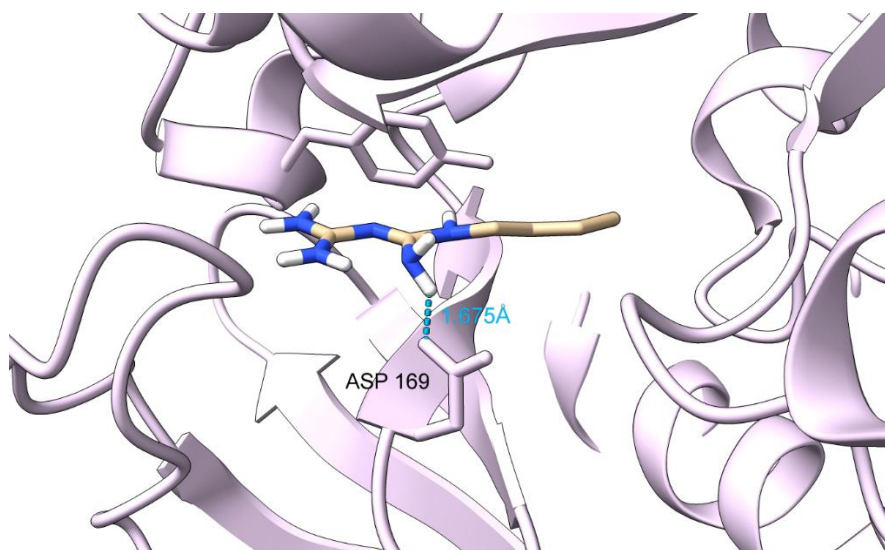

**Figure S84.** Predicted binding mode of buformin in SPMS.

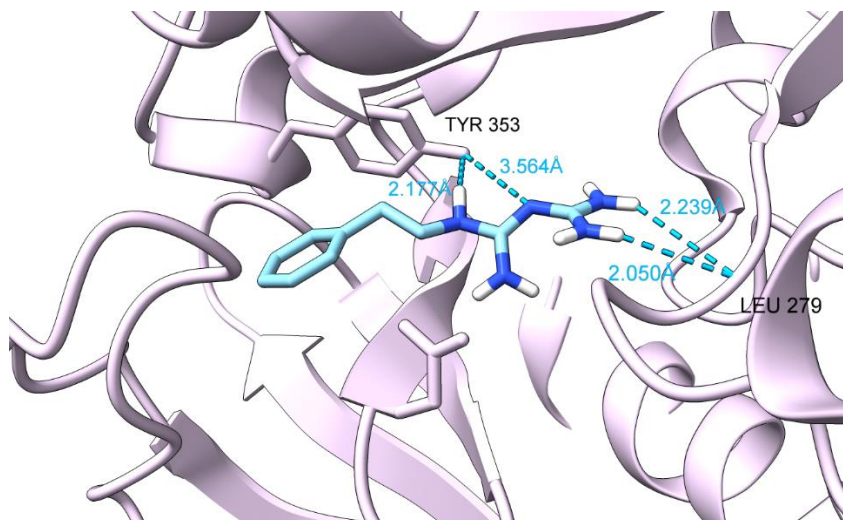

**Figure S85.** Predicted binding mode of phenformin in SPMS.

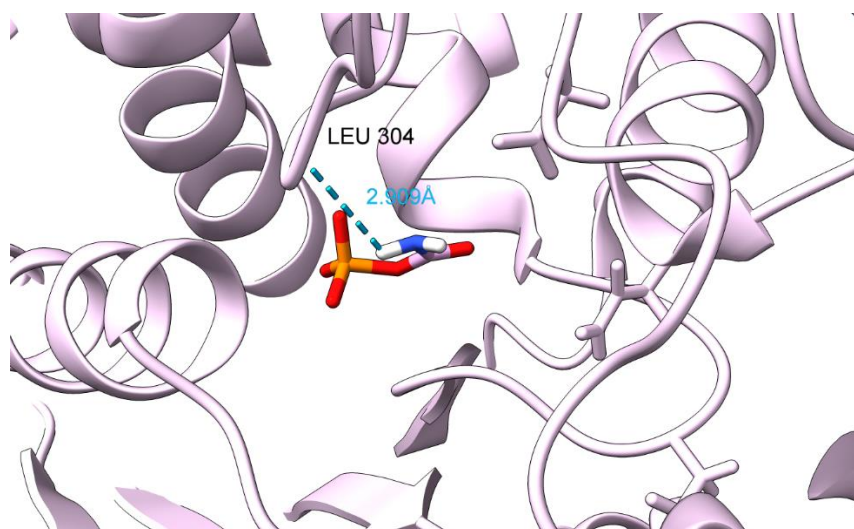

**Figure S86.** Predicted binding mode of carbamoyl phosphate in OTC.

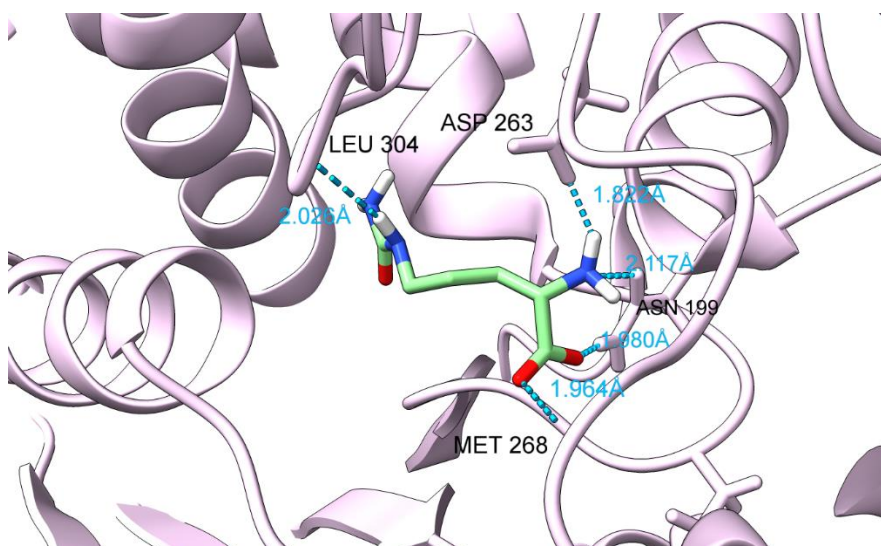



**Figure S87.** Predicted binding mode of L-citrulline in OTC.

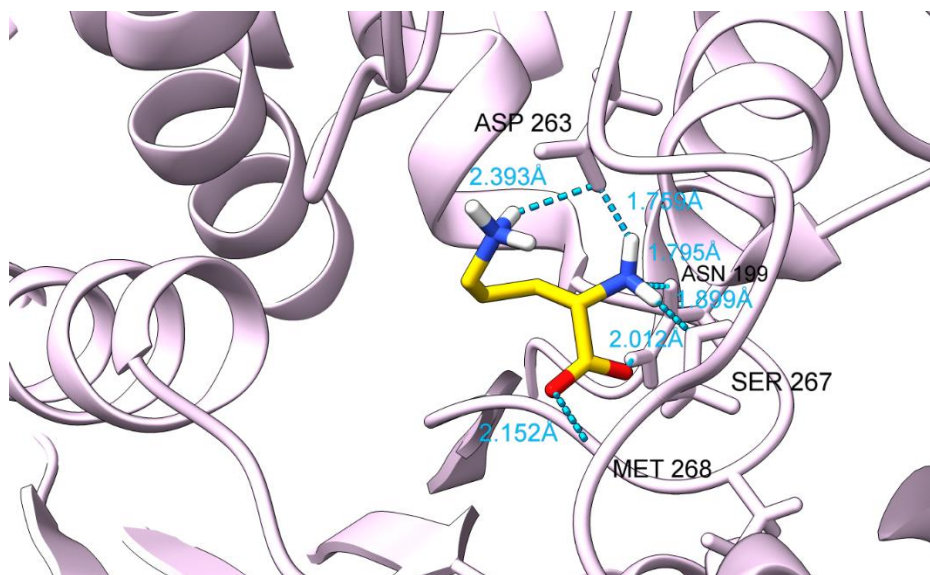

**Figure S88.** Predicted binding mode of L-ornithine in OTC.

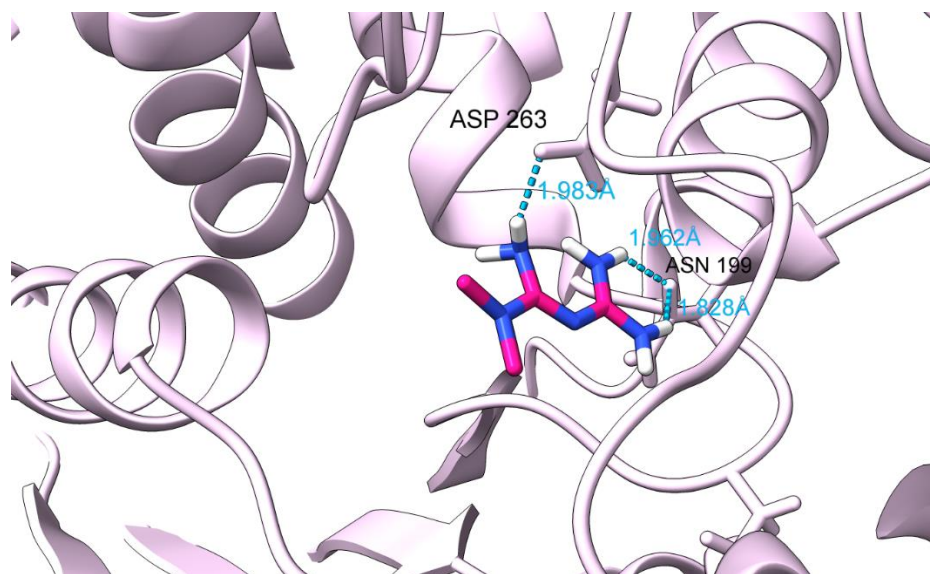

**Figure S89.** Predicted binding mode of metformin in OTC.

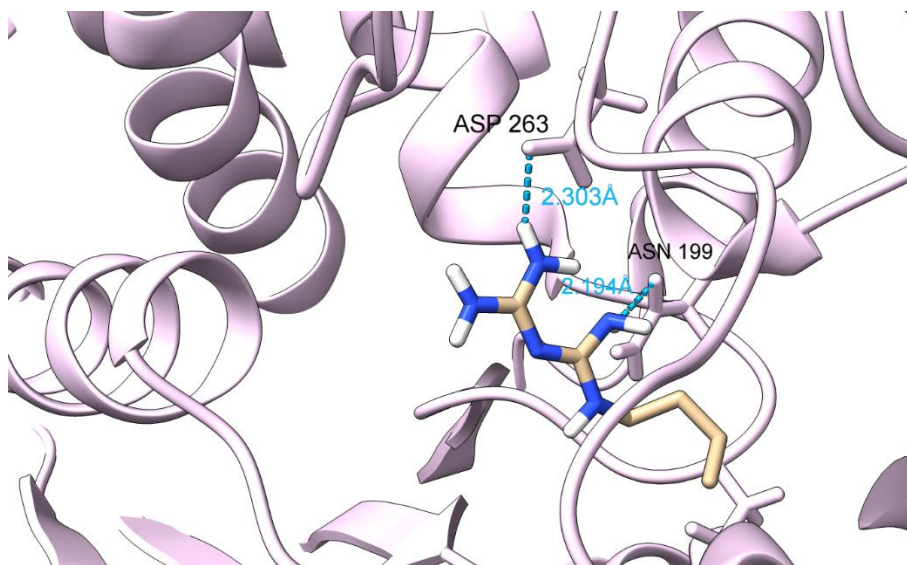

**Figure S90.** Predicted binding mode of buformin in OTC.

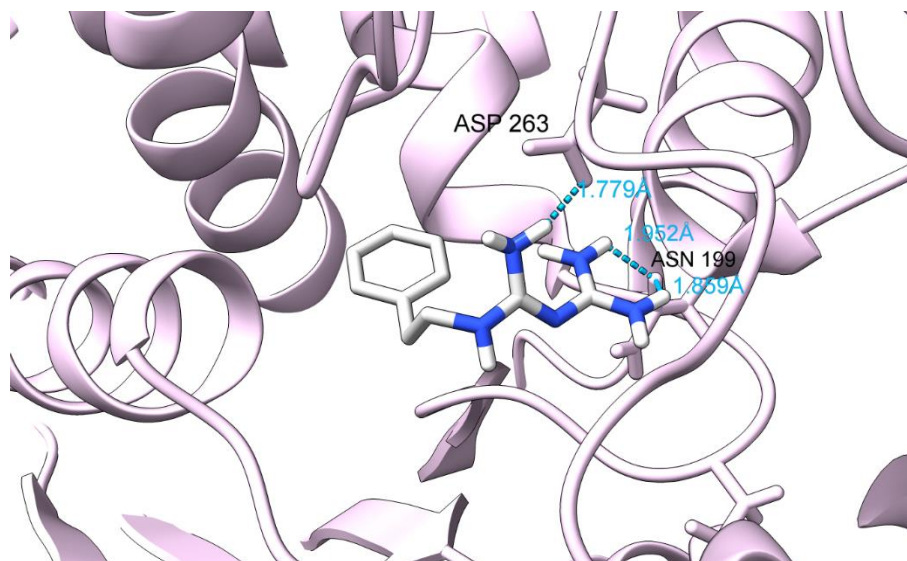

**Figure S91.** Predicted binding mode of phenformin in OTC.



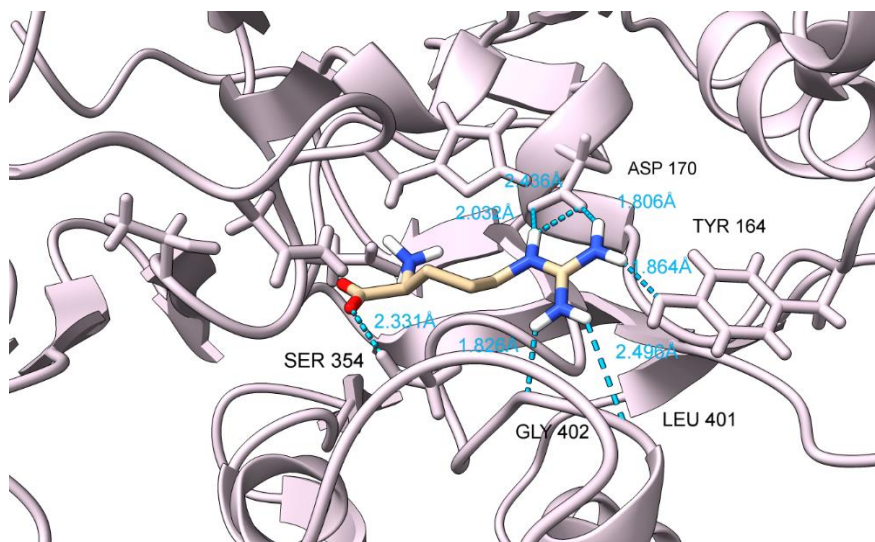

**Figure S92.** Predicted binding mode of L-arginine in AGAT.

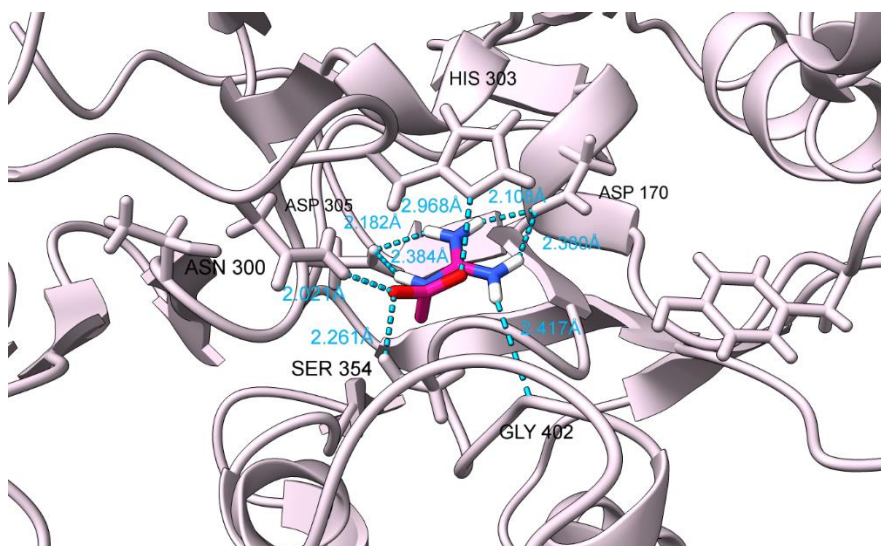

**Figure S93.** Predicted binding mode of guanidinoacetate in AGAT.

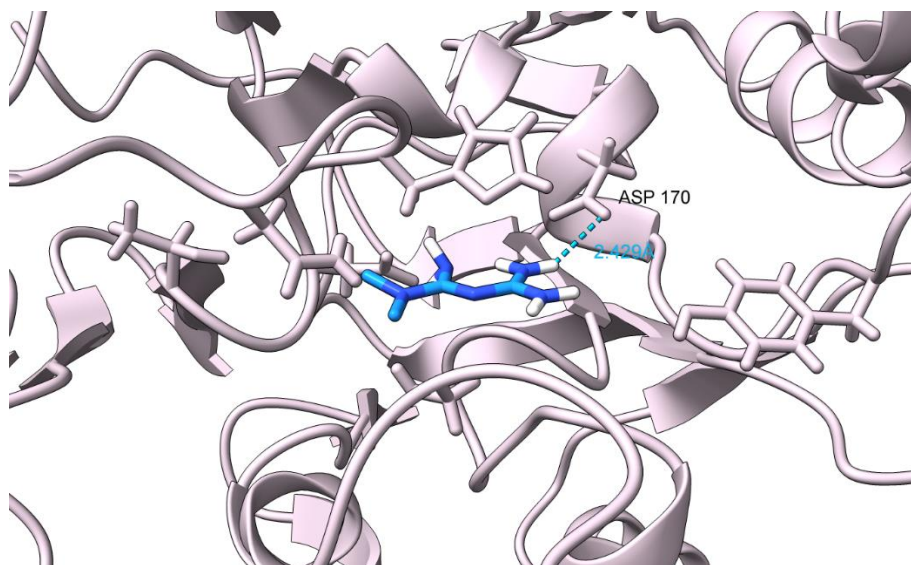

**Figure S94.** Predicted binding mode of metformin in AGAT.

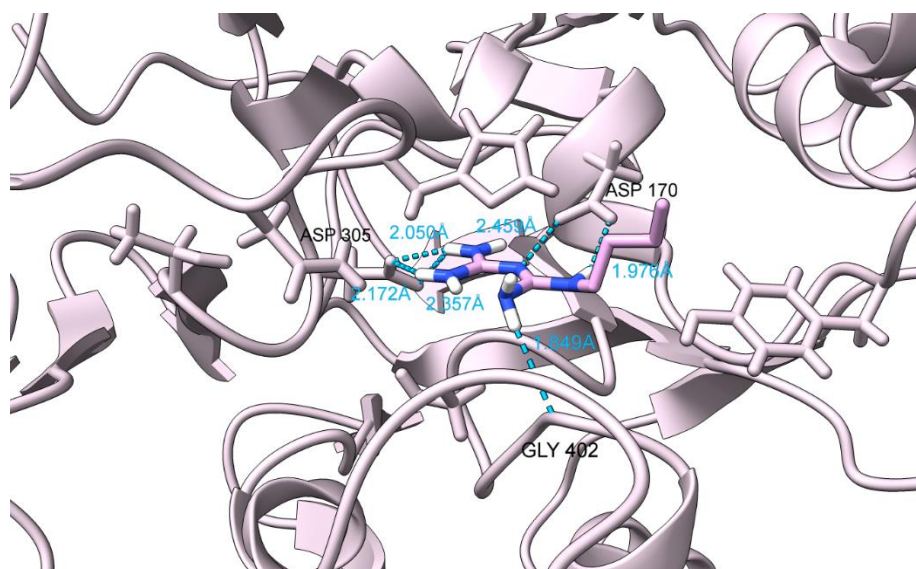

**Figure S95.** Predicted binding mode of buformin in AGAT.

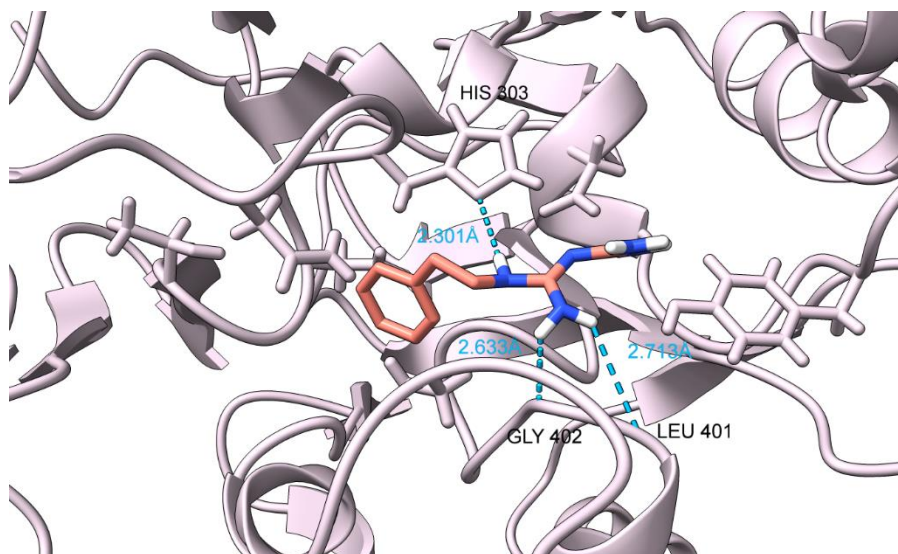

**Figure S96.** Predicted binding mode of phenformin in AGAT.

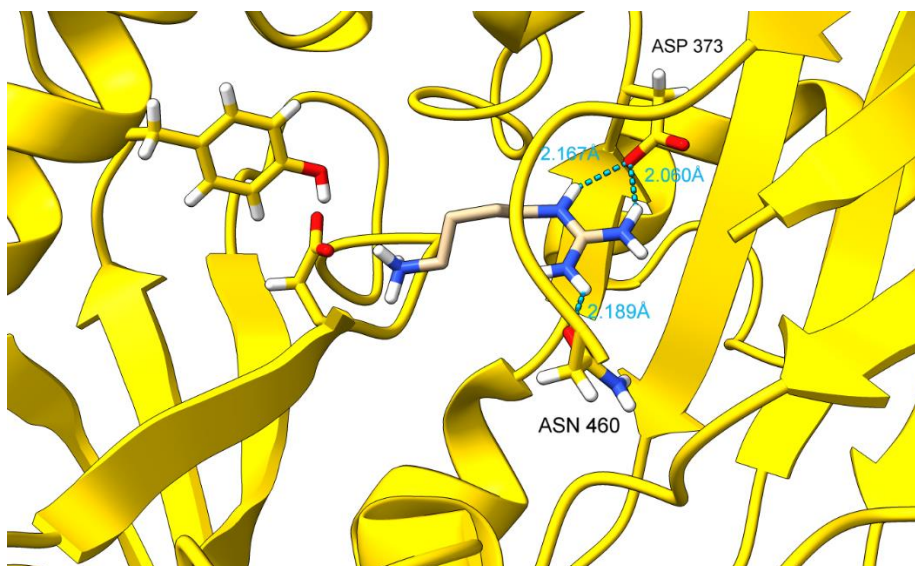

**Figure S97.** Predicted binding mode of agmatine in DAO.



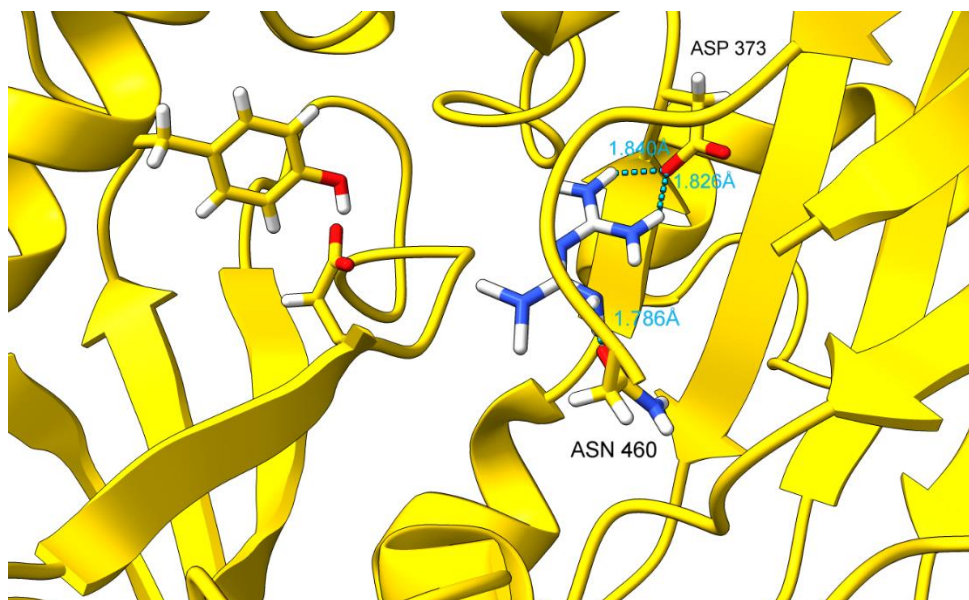

**Figure S98.** Predicted binding mode of metformin in DAO.

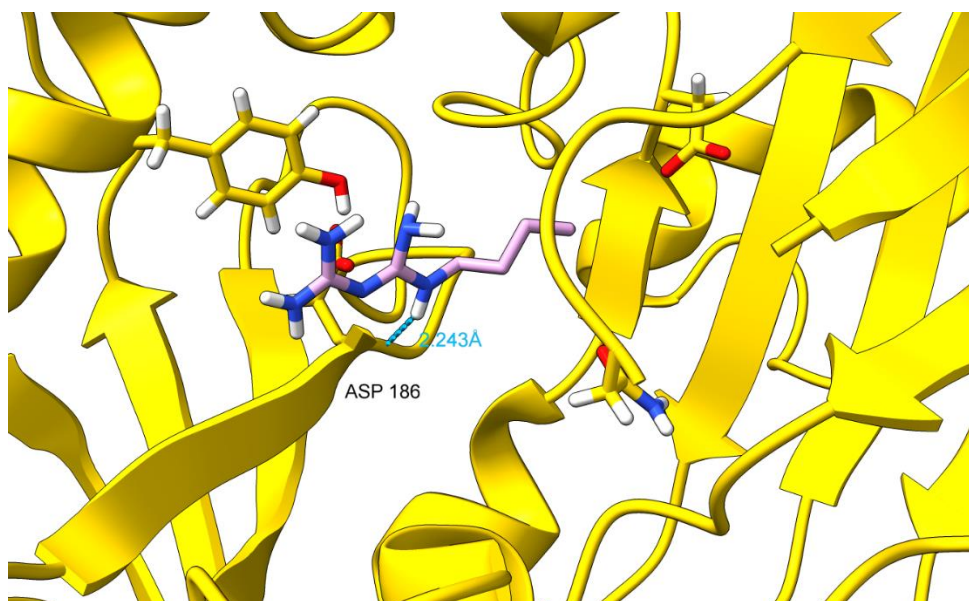

**Figure S99.** Predicted binding mode of buformin in DAO.

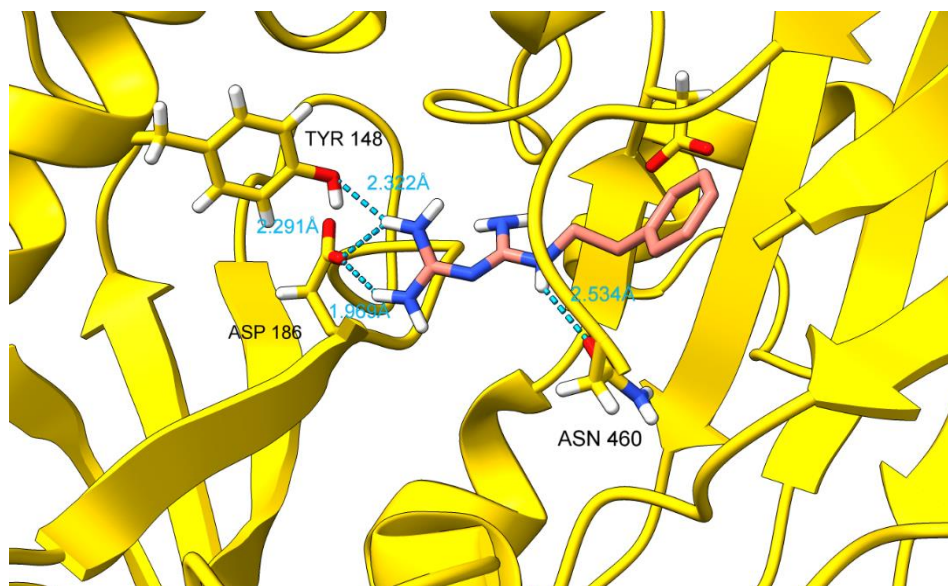

**Figure S100.** Predicted binding mode of phenformin in DAO.

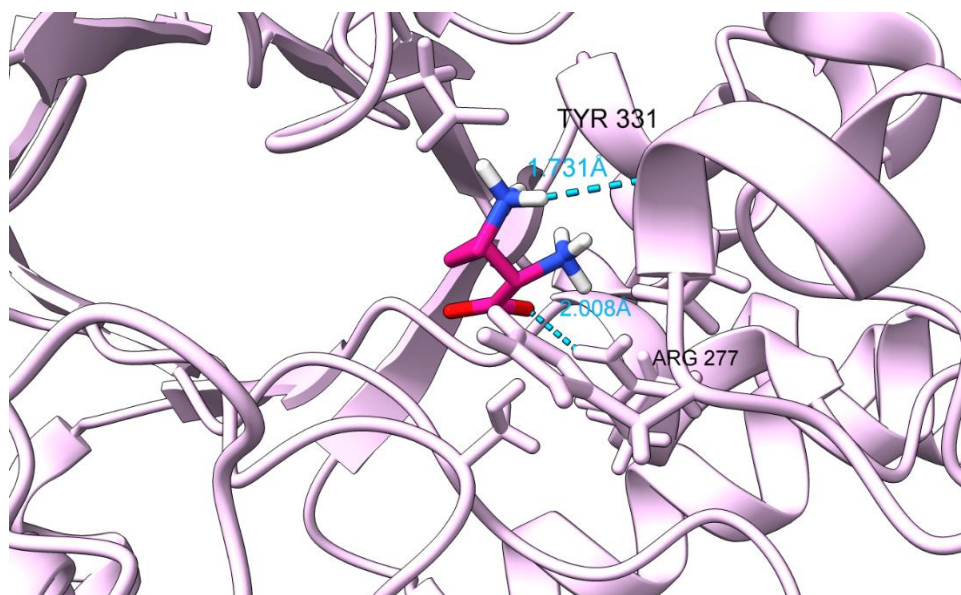

**Figure S101.** Predicted binding mode of L-ornithine in ODC.

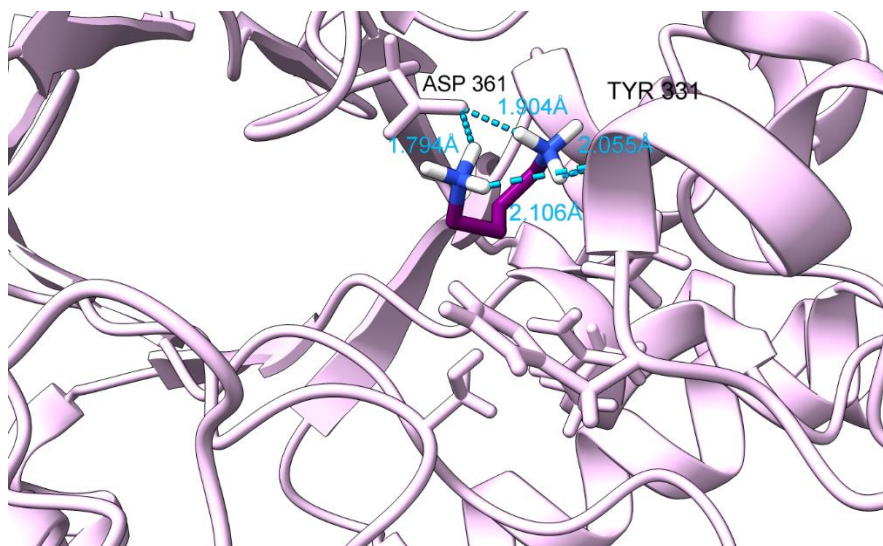

**Figure S102.** Predicted binding mode of putrescine in ODC.

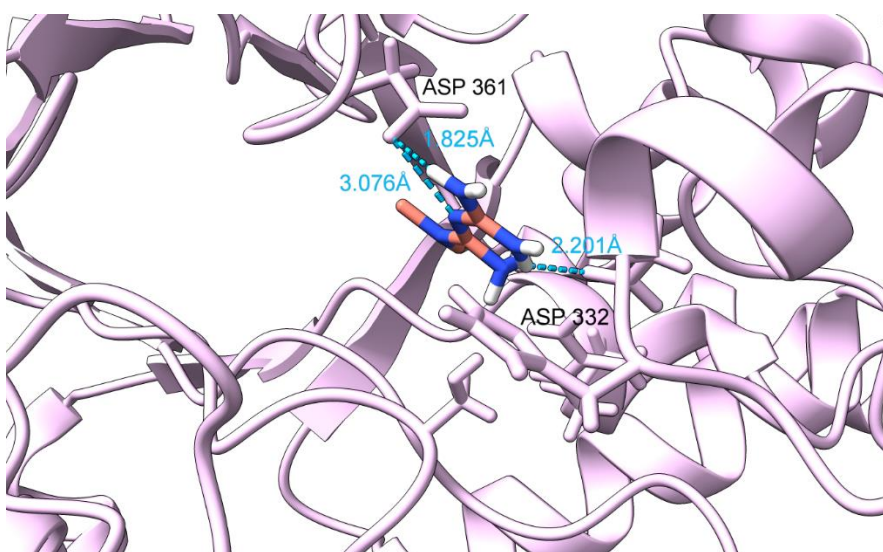

**Figure S103.** Predicted binding mode of metformin in ODC.



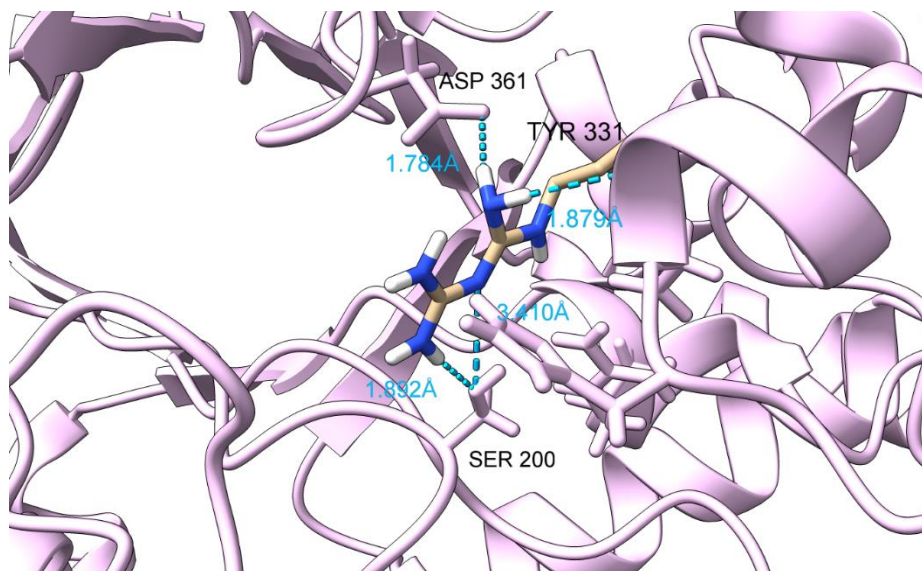

**Figure S104.** Predicted binding mode of buformin in ODC.

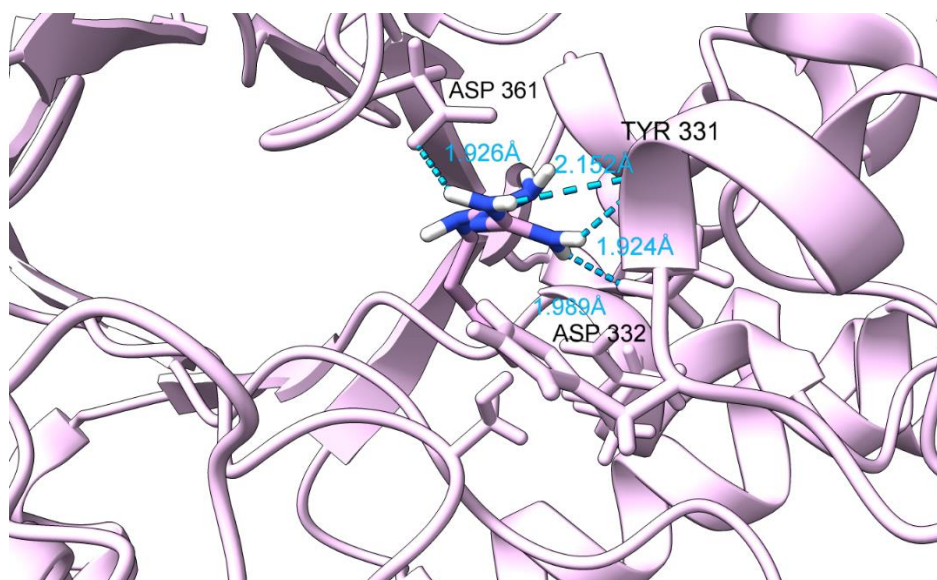

**Figure S105.** Predicted binding mode of phenformin in ODC.

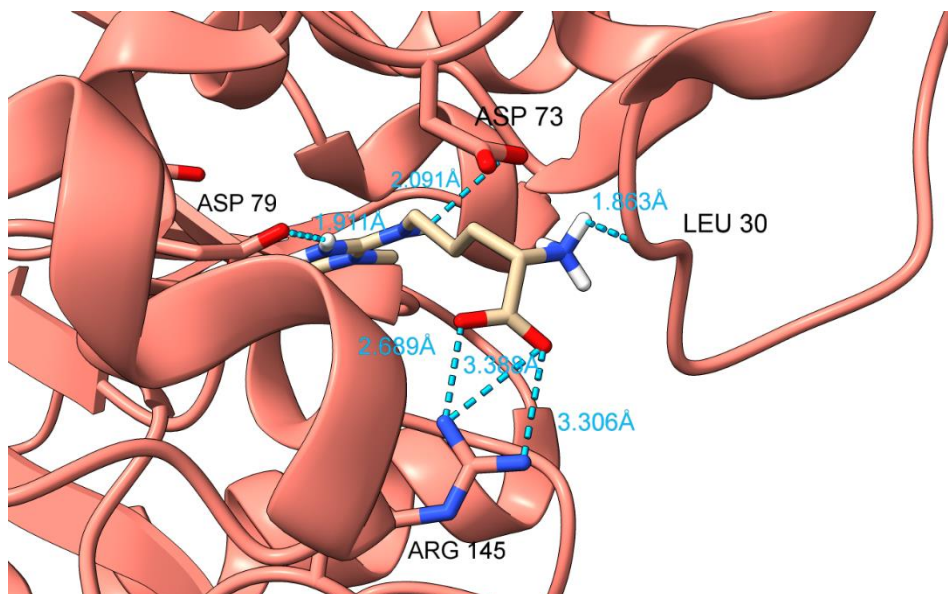

**Figure S106.** Predicted binding mode of ADMA in DDAH1.

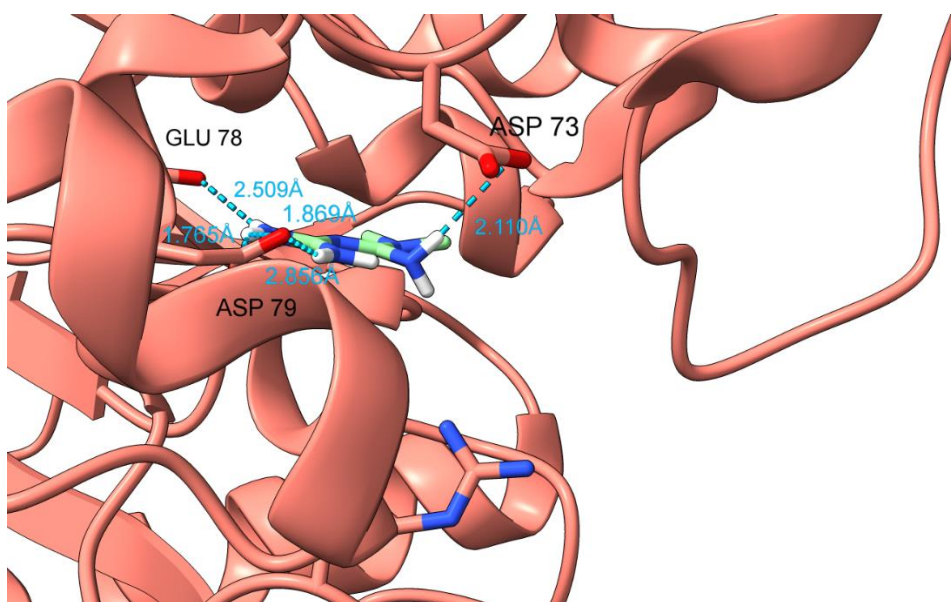

**Figure S107.** Predicted binding mode of metformin in DDAH1.

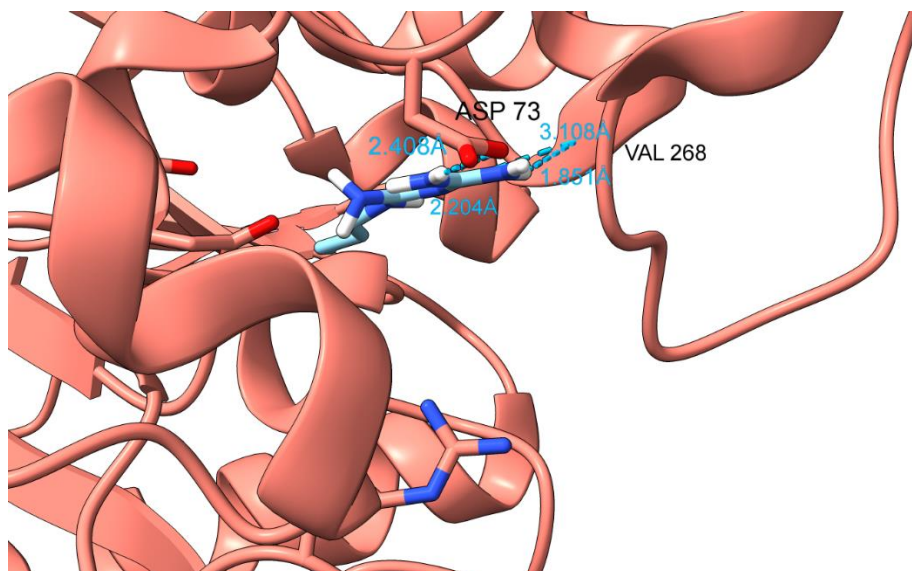

**Figure S108.** Predicted binding mode of buformin in DDAH1.

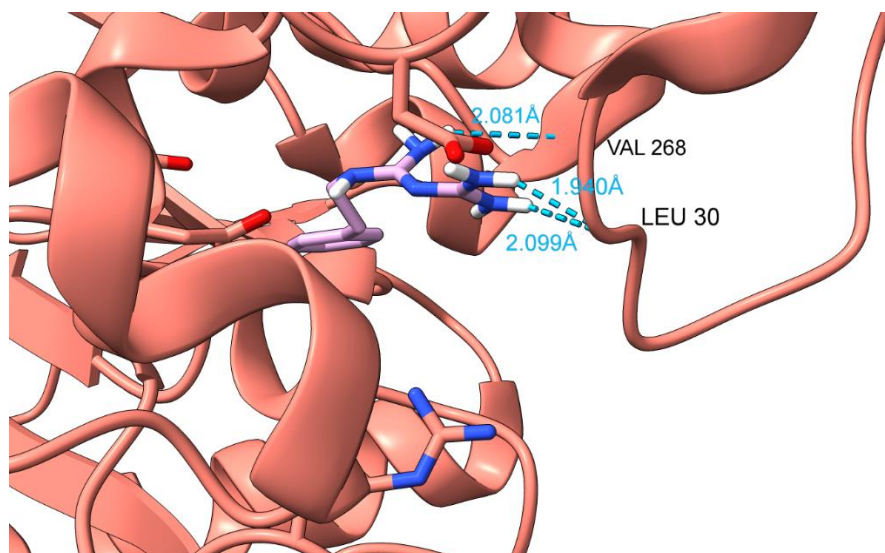

**Figure S109.** Predicted binding mode of phenformin in DDAH1.



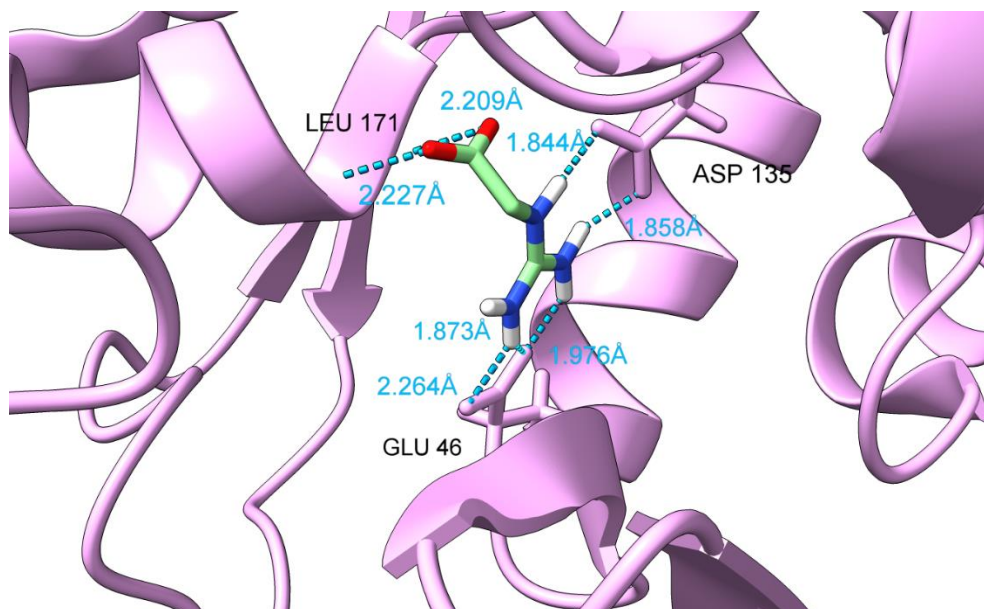

**Figure S110.** Predicted binding mode of guanidinoacetate in GAMT.

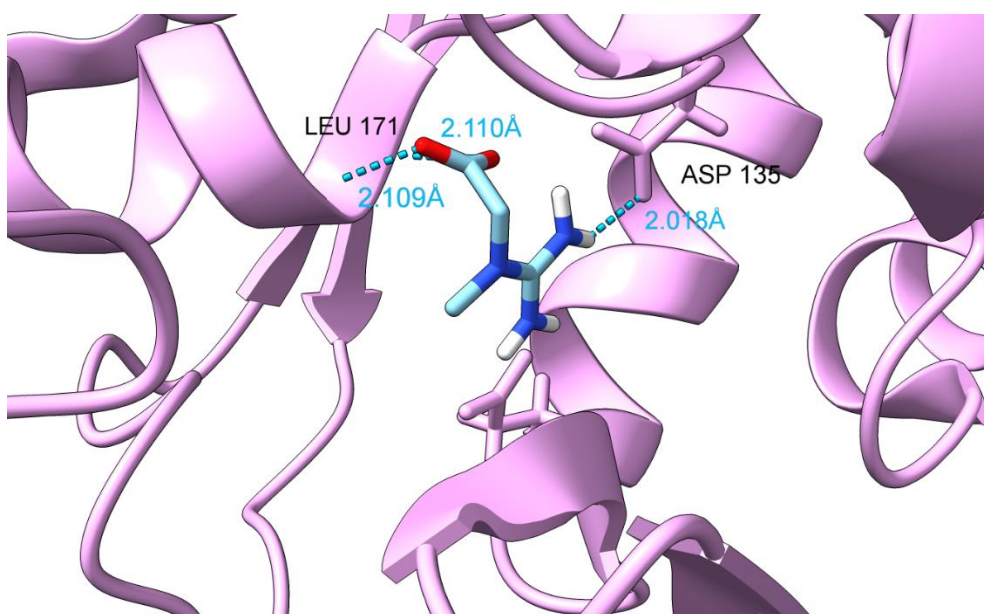

**Figure S111.** Predicted binding mode of creatine in GAMT.

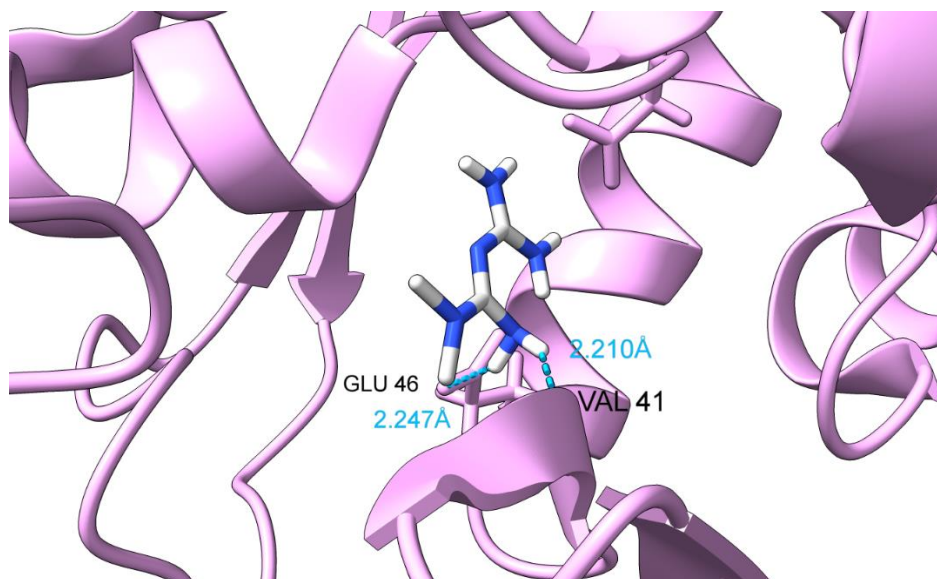

**Figure S112.** Predicted binding mode of metformin in GAMT.

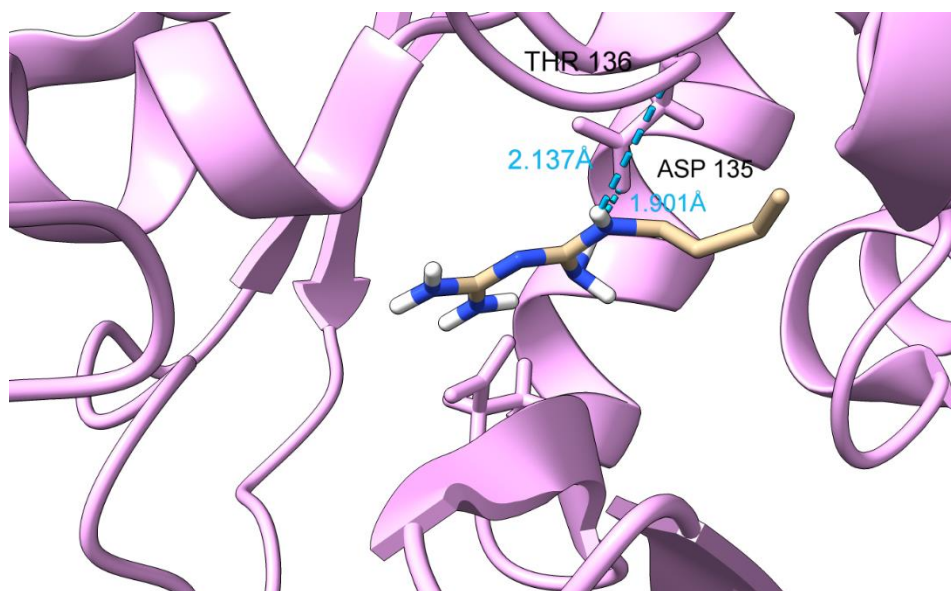

**Figure S113.** Predicted binding mode of buformin in GAMT.

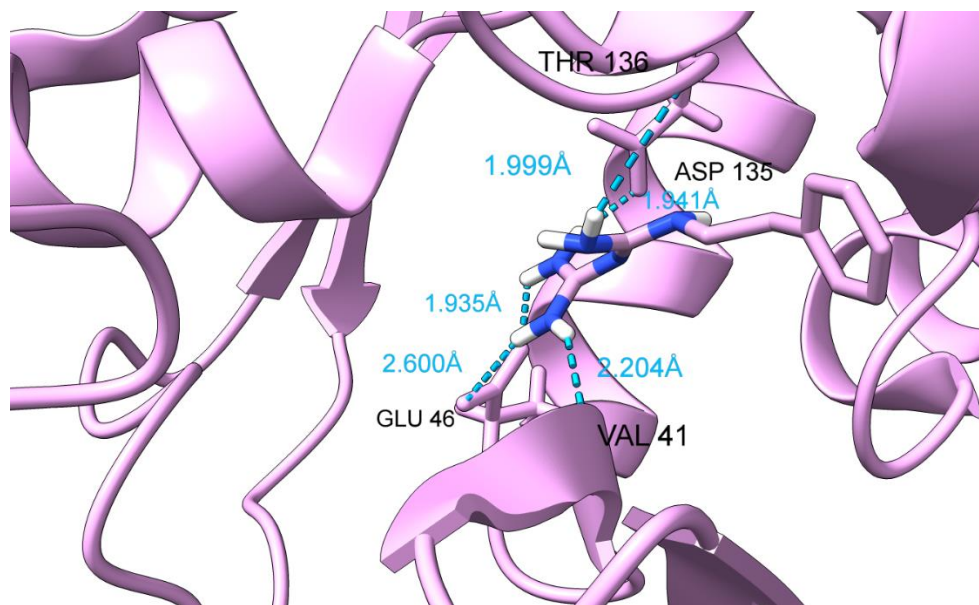

**Figure S114.** Predicted binding mode of phenformin in GAMT.
