# Supplementary material for: Metformin May Alter the Metabolic Reprogramming in Cancer Cells by Disrupting the L-Arginine Metabolism: A Preliminary Computational Study
Source: Int J Mol Sci. 2023 Mar 10;24(6):5316. doi: 10.3390/ijms24065316 (PMC10049129; doi:10.3390/ijms24065316)
Supplement: Supplementary file 1 [file ijms-24-05316-s001.zip › Supplementary material (Part B) IJMS - Isaias Balderas.xlsx]

## Sheet: Database
CID	Nombre	Canonical SMILES	Isomeric SMILES
5960	L-Aspartic acid	C(C(C(=O)O)N)C(=O)O	C([C@@H](C(=O)O)N)C(=O)O
444972	Fumaric acid	C(=CC(=O)O)C(=O)O	C(=C/C(=O)O)\C(=O)O
16950	L-Argininosuccinic acid	C(CC(C(=O)O)N)CN=C(N)NC(CC(=O)O)C(=O)O	C(C[C@@H](C(=O)O)N)CN=C(N)N[C@@H](CC(=O)O)C(=O)O
199	Agmatine	C(CCN=C(N)N)CN	NA
6322	L-Arginine	C(CC(C(=O)O)N)CN=C(N)N	C(C[C@@H](C(=O)O)N)CN=C(N)N
2468	Buformin	CCCCN=C(N)N=C(N)N	NA
273	Cadaverine	C(CCN)CCN	NA
278	Carbamoyl phosphate	C(=O)(N)OP(=O)(O)O	NA
9750	L-Citrulline	C(CC(C(=O)O)N)CNC(=O)N	C(C[C@@H](C(=O)O)N)CNC(=O)N
586	Creatine	CN(CC(=O)O)C(=N)N	NA
123831	Asymmetric dimethylarginine (ADMA)	CN(C)C(=NCCCC(C(=O)O)N)N	CN(C)C(=NCCC[C@@H](C(=O)O)N)N
169148	Symmetric dimethylarginine (SDMA)	CNC(=NC)NCCCC(C(=O)O)N	CNC(=NC)NCCC[C@@H](C(=O)O)N
1102	Spermidine	C(CCNCCCN)CN	NA
1103	Spermine	C(CCNCCCN)CNCCCN	NA
8249	Phenformin	C1=CC=C(C=C1)CCN=C(N)N=C(N)N	NA
763	Guanidinoacetic acid	C(C(=O)O)N=C(N)N	NA
6262	L-Ornithine	C(CC(C(=O)O)N)CN	C(C[C@@H](C(=O)O)N)CN
4091	Metformin	CN(C)C(=N)N=C(N)N	NA
1045	Putrescine	C(CCN)CN	NA
1176	Urea	C(=O)(N)N	NA

## Sheet: 2D Structural comparison
CID	L-Aspartic acid	Fumaric acid	L-Argininosuccinic acid	Agmatine	L-Arginine	Buformin	Cadaverine	Carbamoyl phosphate	L-Citrulline	Creatine	ADMA	SDMA	Spermidine	Spermine	Phenformin	Guanidinoacetic acid	L-Ornithine	Metformin	Putrescine	Urea
L-Aspartic acid	100	35	60	31	61	26	34	26	57	45	54	50	31	30	14	52	70	16	36	18
Fumaric acid	35	100	23	14	28	14	15	20	26	30	25	23	14	13	14	34	31	7	16	10
L-Argininosuccinic acid	60	23	100	38	75	34	30	17	70	54	80	84	34	37	24	47	64	29	27	14
Agmatine	31	14	38	100	50	88	67	11	35	38	44	41	62	63	32	48	37	56	73	23
L-Arginine	61	28	75	50	100	46	41	20	76	52	87	80	35	36	27	62	86	31	37	19
Buformin	26	14	34	88	46	100	58	12	31	42	43	39	54	55	33	50	32	63	62	24
Cadaverine	34	15	30	67	41	58	100	13	38	31	36	33	67	63	26	32	47	32	90	23
Carbamoyl phosphate	26	20	17	11	20	12	13	100	20	23	17	16	11	11	5	29	22	12	14	39
L-Citrulline	57	26	70	35	76	31	38	20	100	51	73	78	39	38	20	47	80	23	34	20
Creatine	45	30	54	38	52	42	31	23	51	100	58	56	33	32	20	68	48	46	32	23
ADMA	54	25	80	44	87	43	36	17	73	58	100	89	35	38	26	55	75	38	32	16
SDMA	50	23	84	41	80	39	33	16	78	56	89	100	36	40	25	50	69	33	30	15
Spermidine	31	14	34	62	35	54	67	11	39	33	35	36	100	92	22	31	37	35	73	19
Spermine	30	13	37	63	36	55	63	11	38	32	38	40	92	100	25	30	35	36	67	18
Phenformin	14	14	24	32	27	33	26	5	20	20	26	25	22	25	100	22	19	23	23	9
Guanidinoacetic acid	52	34	47	48	62	50	32	29	47	68	55	50	31	30	22	100	52	36	34	30
L-Ornithine	70	31	64	37	86	32	47	22	80	48	75	69	37	35	19	52	100	19	43	19
Metformin	16	7	29	56	31	63	32	12	23	46	38	33	35	36	23	36	19	100	34	25
Putrescine	36	16	27	73	37	62	90	14	34	32	32	30	73	67	23	34	43	34	100	25
Urea	18	10	14	23	19	24	23	39	20	23	16	15	19	18	9	30	19	25	25	100

## Sheet: 3D Structural comparison
Molécula 1	CID 1	Conformero	Molécula 2	CID2	Conformero2	ST	CT	Combo T
Ac. Aspartico	5960	1	Ac. Aspártico	5960	1	100	100	200
Ac. Aspartico	5960	1	Ac. Aspártico	5960	2	91	65	156
Ac. Aspartico	5960	1	Ac. Aspártico	5960	3	78	15	93
Ac. Aspartico	5960	1	Ac. Aspártico	5960	4	89	57	146
Ac. Aspartico	5960	1	Ac. Aspártico	5960	5	78	19	97
Ac. Aspartico	5960	1	Ac. Aspártico	5960	7	80	32	112
Ac. Aspartico	5960	1	Ac. Aspártico	5960	8	76	8	84
Ac. Aspartico	5960	1	Ac. Aspártico	5960	9	84	23	107
Ac. Aspartico	5960	1	Ac. Aspártico	5960	11	85	43	128
Ac. Aspartico	5960	1	Ac. Aspártico	5960	12	81	31	112
Ac. Aspartico	5960	2	Ac. Aspártico	5960	1	91	65	156
Ac. Aspartico	5960	2	Ac. Aspártico	5960	2	100	100	200
Ac. Aspartico	5960	2	Ac. Aspártico	5960	3	86	22	108
Ac. Aspartico	5960	2	Ac. Aspártico	5960	4	86	44	130
Ac. Aspartico	5960	2	Ac. Aspártico	5960	5	77	14	91
Ac. Aspartico	5960	2	Ac. Aspártico	5960	7	84	34	118
Ac. Aspartico	5960	2	Ac. Aspártico	5960	8	78	13	91
Ac. Aspartico	5960	2	Ac. Aspártico	5960	9	80	20	100
Ac. Aspartico	5960	2	Ac. Aspártico	5960	11	89	57	146
Ac. Aspartico	5960	2	Ac. Aspártico	5960	12	83	30	113
Ac. Aspartico	5960	3	Ac. Aspártico	5960	1	78	14	92
Ac. Aspartico	5960	3	Ac. Aspártico	5960	2	86	22	108
Ac. Aspartico	5960	3	Ac. Aspártico	5960	3	100	100	200
Ac. Aspartico	5960	3	Ac. Aspártico	5960	4	78	16	94
Ac. Aspartico	5960	3	Ac. Aspártico	5960	5	78	28	106
Ac. Aspartico	5960	3	Ac. Aspártico	5960	7	84	29	113
Ac. Aspartico	5960	3	Ac. Aspártico	5960	8	87	48	135
Ac. Aspartico	5960	3	Ac. Aspártico	5960	9	83	40	123
Ac. Aspartico	5960	3	Ac. Aspártico	5960	11	84	18	102
Ac. Aspartico	5960	3	Ac. Aspártico	5960	12	82	15	97
Ac. Aspartico	5960	4	Ac. Aspártico	5960	1	89	57	146
Ac. Aspartico	5960	4	Ac. Aspártico	5960	2	86	44	130
Ac. Aspartico	5960	4	Ac. Aspártico	5960	3	78	16	94
Ac. Aspartico	5960	4	Ac. Aspártico	5960	4	100	100	200
Ac. Aspartico	5960	4	Ac. Aspártico	5960	5	78	13	91
Ac. Aspartico	5960	4	Ac. Aspártico	5960	7	82	29	111
Ac. Aspartico	5960	4	Ac. Aspártico	5960	8	79	11	90
Ac. Aspartico	5960	4	Ac. Aspártico	5960	9	77	15	92
Ac. Aspartico	5960	4	Ac. Aspártico	5960	11	91	65	156
Ac. Aspartico	5960	4	Ac. Aspártico	5960	12	83	35	118
Ac. Aspartico	5960	5	Ac. Aspártico	5960	1	78	19	97
Ac. Aspartico	5960	5	Ac. Aspártico	5960	2	74	12	86
Ac. Aspartico	5960	5	Ac. Aspártico	5960	3	78	28	106
Ac. Aspartico	5960	5	Ac. Aspártico	5960	4	78	13	91
Ac. Aspartico	5960	5	Ac. Aspártico	5960	5	100	100	200
Ac. Aspartico	5960	5	Ac. Aspártico	5960	7	77	24	101
Ac. Aspartico	5960	5	Ac. Aspártico	5960	8	81	43	124
Ac. Aspartico	5960	5	Ac. Aspártico	5960	9	77	22	99
Ac. Aspartico	5960	5	Ac. Aspártico	5960	11	79	14	93
Ac. Aspartico	5960	5	Ac. Aspártico	5960	12	78	7	85
Ac. Aspartico	5960	7	Ac. Aspártico	5960	1	80	32	112
Ac. Aspartico	5960	7	Ac. Aspártico	5960	2	84	34	118
Ac. Aspartico	5960	7	Ac. Aspártico	5960	3	84	29	113
Ac. Aspartico	5960	7	Ac. Aspártico	5960	4	82	29	111
Ac. Aspartico	5960	7	Ac. Aspártico	5960	5	77	24	101
Ac. Aspartico	5960	7	Ac. Aspártico	5960	7	100	100	200
Ac. Aspartico	5960	7	Ac. Aspártico	5960	8	92	52	144
Ac. Aspartico	5960	7	Ac. Aspártico	5960	9	91	65	156
Ac. Aspartico	5960	7	Ac. Aspártico	5960	11	83	23	106
Ac. Aspartico	5960	7	Ac. Aspártico	5960	12	81	19	100
Ac. Aspartico	5960	8	Ac. Aspártico	5960	1	76	8	84
Ac. Aspartico	5960	8	Ac. Aspártico	5960	2	78	13	91
Ac. Aspartico	5960	8	Ac. Aspártico	5960	3	87	48	135
Ac. Aspartico	5960	8	Ac. Aspártico	5960	4	79	11	90
Ac. Aspartico	5960	8	Ac. Aspártico	5960	5	81	43	124
Ac. Aspartico	5960	8	Ac. Aspártico	5960	7	92	52	144
Ac. Aspartico	5960	8	Ac. Aspártico	5960	8	100	100	200
Ac. Aspartico	5960	8	Ac. Aspártico	5960	9	87	45	132
Ac. Aspartico	5960	8	Ac. Aspártico	5960	11	83	21	104
Ac. Aspartico	5960	8	Ac. Aspártico	5960	12	82	18	100
Ac. Aspartico	5960	9	Ac. Aspártico	5960	1	84	23	107
Ac. Aspartico	5960	9	Ac. Aspártico	5960	2	80	20	100
Ac. Aspartico	5960	9	Ac. Aspártico	5960	3	83	40	123
Ac. Aspartico	5960	9	Ac. Aspártico	5960	4	77	15	92
Ac. Aspartico	5960	9	Ac. Aspártico	5960	5	77	23	100
Ac. Aspartico	5960	9	Ac. Aspártico	5960	7	91	65	156
Ac. Aspartico	5960	9	Ac. Aspártico	5960	8	87	45	132
Ac. Aspartico	5960	9	Ac. Aspártico	5960	9	100	100	200
Ac. Aspartico	5960	9	Ac. Aspártico	5960	11	79	15	94
Ac. Aspartico	5960	9	Ac. Aspártico	5960	12	79	16	95
Ac. Aspartico	5960	11	Ac. Aspártico	5960	1	85	43	128
Ac. Aspartico	5960	11	Ac. Aspártico	5960	2	89	57	146
Ac. Aspartico	5960	11	Ac. Aspártico	5960	3	84	18	102
Ac. Aspartico	5960	11	Ac. Aspártico	5960	4	92	64	156
Ac. Aspartico	5960	11	Ac. Aspártico	5960	5	79	14	93
Ac. Aspartico	5960	11	Ac. Aspártico	5960	7	83	23	106
Ac. Aspartico	5960	11	Ac. Aspártico	5960	8	83	21	104
Ac. Aspartico	5960	11	Ac. Aspártico	5960	9	79	15	94
Ac. Aspartico	5960	11	Ac. Aspártico	5960	11	100	100	200
Ac. Aspartico	5960	11	Ac. Aspártico	5960	12	87	48	135
Ac. Aspartico	5960	12	Ac. Aspártico	5960	1	81	31	112
Ac. Aspartico	5960	12	Ac. Aspártico	5960	2	83	29	112
Ac. Aspartico	5960	12	Ac. Aspártico	5960	3	81	15	96
Ac. Aspartico	5960	12	Ac. Aspártico	5960	4	83	35	118
Ac. Aspartico	5960	12	Ac. Aspártico	5960	5	78	7	85
Ac. Aspartico	5960	12	Ac. Aspártico	5960	7	81	19	100
Ac. Aspartico	5960	12	Ac. Aspártico	5960	8	82	18	100
Ac. Aspartico	5960	12	Ac. Aspártico	5960	9	79	16	95
Ac. Aspartico	5960	12	Ac. Aspártico	5960	11	87	48	135
Ac. Aspartico	5960	12	Ac. Aspártico	5960	12	100	100	200
Ac. Aspartico	5960	1	Ac. Fumarico	444972	1	85	35	120
Ac. Aspartico	5960	1	Ac. Fumarico	444972	2	85	35	120
Ac. Aspartico	5960	1	Ac. Fumarico	444972	3	85	37	122
Ac. Aspartico	5960	1	Ac. Fumarico	444972	4	77	16	93
Ac. Aspartico	5960	1	Ac. Fumarico	444972	5	90	53	143
Ac. Aspartico	5960	2	Ac. Fumarico	444972	1	84	28	112
Ac. Aspartico	5960	2	Ac. Fumarico	444972	2	91	53	144
Ac. Aspartico	5960	2	Ac. Fumarico	444972	3	82	24	106
Ac. Aspartico	5960	2	Ac. Fumarico	444972	4	80	20	100
Ac. Aspartico	5960	2	Ac. Fumarico	444972	5	85	36	121
Ac. Aspartico	5960	3	Ac. Fumarico	444972	1	77	20	97
Ac. Aspartico	5960	3	Ac. Fumarico	444972	2	81	20	101
Ac. Aspartico	5960	3	Ac. Fumarico	444972	3	84	22	106
Ac. Aspartico	5960	3	Ac. Fumarico	444972	4	79	20	99
Ac. Aspartico	5960	3	Ac. Fumarico	444972	5	81	18	99
Ac. Aspartico	5960	4	Ac. Fumarico	444972	1	94	66	160
Ac. Aspartico	5960	4	Ac. Fumarico	444972	2	84	34	118
Ac. Aspartico	5960	4	Ac. Fumarico	444972	3	89	50	139
Ac. Aspartico	5960	4	Ac. Fumarico	444972	4	87	44	131
Ac. Aspartico	5960	4	Ac. Fumarico	444972	5	84	34	118
Ac. Aspartico	5960	5	Ac. Fumarico	444972	1	80	17	97
Ac. Aspartico	5960	5	Ac. Fumarico	444972	2	80	14	94
Ac. Aspartico	5960	5	Ac. Fumarico	444972	3	82	19	101
Ac. Aspartico	5960	5	Ac. Fumarico	444972	4	75	29	104
Ac. Aspartico	5960	5	Ac. Fumarico	444972	5	83	18	101
Ac. Aspartico	5960	7	Ac. Fumarico	444972	1	86	29	115
Ac. Aspartico	5960	7	Ac. Fumarico	444972	2	85	28	113
Ac. Aspartico	5960	7	Ac. Fumarico	444972	3	83	22	105
Ac. Aspartico	5960	7	Ac. Fumarico	444972	4	81	27	108
Ac. Aspartico	5960	7	Ac. Fumarico	444972	5	80	21	101
Ac. Aspartico	5960	8	Ac. Fumarico	444972	1	82	21	103
Ac. Aspartico	5960	8	Ac. Fumarico	444972	2	84	23	107
Ac. Aspartico	5960	8	Ac. Fumarico	444972	3	80	16	96
Ac. Aspartico	5960	8	Ac. Fumarico	444972	4	76	26	102
Ac. Aspartico	5960	8	Ac. Fumarico	444972	5	82	18	100
Ac. Aspartico	5960	9	Ac. Fumarico	444972	1	80	27	107
Ac. Aspartico	5960	9	Ac. Fumarico	444972	2	82	18	100
Ac. Aspartico	5960	9	Ac. Fumarico	444972	3	81	18	99
Ac. Aspartico	5960	9	Ac. Fumarico	444972	4	73	21	94
Ac. Aspartico	5960	9	Ac. Fumarico	444972	5	85	26	111
Ac. Aspartico	5960	11	Ac. Fumarico	444972	1	86	36	122
Ac. Aspartico	5960	11	Ac. Fumarico	444972	2	89	47	136
Ac. Aspartico	5960	11	Ac. Fumarico	444972	3	92	52	144
Ac. Aspartico	5960	11	Ac. Fumarico	444972	4	81	30	111
Ac. Aspartico	5960	11	Ac. Fumarico	444972	5	88	44	132
Ac. Aspartico	5960	12	Ac. Fumarico	444972	1	88	46	134
Ac. Aspartico	5960	12	Ac. Fumarico	444972	2	89	47	136
Ac. Aspartico	5960	12	Ac. Fumarico	444972	3	92	63	155
Ac. Aspartico	5960	12	Ac. Fumarico	444972	4	82	18	100
Ac. Aspartico	5960	12	Ac. Fumarico	444972	5	92	60	152
Ac. Aspartico	5960	1	Ac. Argininosucc.	16950	1	49	11	60
Ac. Aspartico	5960	1	Ac. Argininosucc.	16950	20	43	0	43
Ac. Aspartico	5960	1	Ac. Argininosucc.	16950	33	44	9	53
Ac. Aspartico	5960	1	Ac. Argininosucc.	16950	36	49	4	53
Ac. Aspartico	5960	1	Ac. Argininosucc.	16950	40	50	1	51
Ac. Aspartico	5960	1	Ac. Argininosucc.	16950	43	44	7	51
Ac. Aspartico	5960	1	Ac. Argininosucc.	16950	46	43	8	51
Ac. Aspartico	5960	1	Ac. Argininosucc.	16950	49	44	8	52
Ac. Aspartico	5960	1	Ac. Argininosucc.	16950	53	43	3	46
Ac. Aspartico	5960	1	Ac. Argininosucc.	16950	62	46	2	48
Ac. Aspartico	5960	2	Ac. Argininosucc.	16950	1	45	1	46
Ac. Aspartico	5960	2	Ac. Argininosucc.	16950	20	43	0	43
Ac. Aspartico	5960	2	Ac. Argininosucc.	16950	33	46	9	55
Ac. Aspartico	5960	2	Ac. Argininosucc.	16950	36	47	2	49
Ac. Aspartico	5960	2	Ac. Argininosucc.	16950	40	49	12	61
Ac. Aspartico	5960	2	Ac. Argininosucc.	16950	43	43	7	50
Ac. Aspartico	5960	2	Ac. Argininosucc.	16950	46	44	8	52
Ac. Aspartico	5960	2	Ac. Argininosucc.	16950	49	46	8	54
Ac. Aspartico	5960	2	Ac. Argininosucc.	16950	53	44	3	47
Ac. Aspartico	5960	2	Ac. Argininosucc.	16950	62	41	1	42
Ac. Aspartico	5960	3	Ac. Argininosucc.	16950	1	46	5	51
Ac. Aspartico	5960	3	Ac. Argininosucc.	16950	20	46	9	55
Ac. Aspartico	5960	3	Ac. Argininosucc.	16950	33	46	4	50
Ac. Aspartico	5960	3	Ac. Argininosucc.	16950	36	43	3	46
Ac. Aspartico	5960	3	Ac. Argininosucc.	16950	40	44	2	46
Ac. Aspartico	5960	3	Ac. Argininosucc.	16950	43	45	4	49
Ac. Aspartico	5960	3	Ac. Argininosucc.	16950	46	46	2	48
Ac. Aspartico	5960	3	Ac. Argininosucc.	16950	49	45	3	48
Ac. Aspartico	5960	3	Ac. Argininosucc.	16950	53	45	8	53
Ac. Aspartico	5960	3	Ac. Argininosucc.	16950	62	46	0	46
Ac. Aspartico	5960	4	Ac. Argininosucc.	16950	1	38	1	39
Ac. Aspartico	5960	4	Ac. Argininosucc.	16950	20	47	1	48
Ac. Aspartico	5960	4	Ac. Argininosucc.	16950	33	40	3	43
Ac. Aspartico	5960	4	Ac. Argininosucc.	16950	36	43	1	44
Ac. Aspartico	5960	4	Ac. Argininosucc.	16950	40	45	3	48
Ac. Aspartico	5960	4	Ac. Argininosucc.	16950	43	43	5	48
Ac. Aspartico	5960	4	Ac. Argininosucc.	16950	46	43	6	49
Ac. Aspartico	5960	4	Ac. Argininosucc.	16950	49	40	5	45
Ac. Aspartico	5960	4	Ac. Argininosucc.	16950	53	41	4	45
Ac. Aspartico	5960	4	Ac. Argininosucc.	16950	62	43	0	43
Ac. Aspartico	5960	5	Ac. Argininosucc.	16950	1	41	9	50
Ac. Aspartico	5960	5	Ac. Argininosucc.	16950	20	42	10	52
Ac. Aspartico	5960	5	Ac. Argininosucc.	16950	33	31	0	31
Ac. Aspartico	5960	5	Ac. Argininosucc.	16950	36	43	2	45
Ac. Aspartico	5960	5	Ac. Argininosucc.	16950	40	46	5	51
Ac. Aspartico	5960	5	Ac. Argininosucc.	16950	43	33	0	33
Ac. Aspartico	5960	5	Ac. Argininosucc.	16950	46	34	0	34
Ac. Aspartico	5960	5	Ac. Argininosucc.	16950	49	42	3	45
Ac. Aspartico	5960	5	Ac. Argininosucc.	16950	53	42	5	47
Ac. Aspartico	5960	5	Ac. Argininosucc.	16950	62	43	2	45
Ac. Aspartico	5960	7	Ac. Argininosucc.	16950	1	39	0	39
Ac. Aspartico	5960	7	Ac. Argininosucc.	16950	20	43	0	43
Ac. Aspartico	5960	7	Ac. Argininosucc.	16950	33	38	0	38
Ac. Aspartico	5960	7	Ac. Argininosucc.	16950	36	47	10	57
Ac. Aspartico	5960	7	Ac. Argininosucc.	16950	40	41	1	42
Ac. Aspartico	5960	7	Ac. Argininosucc.	16950	43	46	7	53
Ac. Aspartico	5960	7	Ac. Argininosucc.	16950	46	47	8	55
Ac. Aspartico	5960	7	Ac. Argininosucc.	16950	49	41	1	42
Ac. Aspartico	5960	7	Ac. Argininosucc.	16950	53	43	4	47
Ac. Aspartico	5960	7	Ac. Argininosucc.	16950	62	42	0	42
Ac. Aspartico	5960	8	Ac. Argininosucc.	16950	1	43	7	50
Ac. Aspartico	5960	8	Ac. Argininosucc.	16950	20	46	8	54
Ac. Aspartico	5960	8	Ac. Argininosucc.	16950	33	37	0	37
Ac. Aspartico	5960	8	Ac. Argininosucc.	16950	36	45	4	49
Ac. Aspartico	5960	8	Ac. Argininosucc.	16950	40	45	2	47
Ac. Aspartico	5960	8	Ac. Argininosucc.	16950	43	47	5	52
Ac. Aspartico	5960	8	Ac. Argininosucc.	16950	46	48	9	57
Ac. Aspartico	5960	8	Ac. Argininosucc.	16950	49	39	0	39
Ac. Aspartico	5960	8	Ac. Argininosucc.	16950	53	45	8	53
Ac. Aspartico	5960	8	Ac. Argininosucc.	16950	62	46	4	50
Ac. Aspartico	5960	9	Ac. Argininosucc.	16950	1	45	6	51
Ac. Aspartico	5960	9	Ac. Argininosucc.	16950	20	45	5	50
Ac. Aspartico	5960	9	Ac. Argininosucc.	16950	33	46	5	51
Ac. Aspartico	5960	9	Ac. Argininosucc.	16950	36	46	5	51
Ac. Aspartico	5960	9	Ac. Argininosucc.	16950	40	47	10	57
Ac. Aspartico	5960	9	Ac. Argininosucc.	16950	43	46	5	51
Ac. Aspartico	5960	9	Ac. Argininosucc.	16950	46	45	5	50
Ac. Aspartico	5960	9	Ac. Argininosucc.	16950	49	45	5	50
Ac. Aspartico	5960	9	Ac. Argininosucc.	16950	53	42	6	48
Ac. Aspartico	5960	9	Ac. Argininosucc.	16950	62	47	7	54
Ac. Aspartico	5960	11	Ac. Argininosucc.	16950	1	41	0	41
Ac. Aspartico	5960	11	Ac. Argininosucc.	16950	20	48	0	48
Ac. Aspartico	5960	11	Ac. Argininosucc.	16950	33	41	7	48
Ac. Aspartico	5960	11	Ac. Argininosucc.	16950	36	47	3	50
Ac. Aspartico	5960	11	Ac. Argininosucc.	16950	40	43	0	43
Ac. Aspartico	5960	11	Ac. Argininosucc.	16950	43	45	5	50
Ac. Aspartico	5960	11	Ac. Argininosucc.	16950	46	46	7	53
Ac. Aspartico	5960	11	Ac. Argininosucc.	16950	49	42	6	48
Ac. Aspartico	5960	11	Ac. Argininosucc.	16950	53	42	6	48
Ac. Aspartico	5960	11	Ac. Argininosucc.	16950	62	47	0	47
Ac. Aspartico	5960	12	Ac. Argininosucc.	16950	1	42	5	47
Ac. Aspartico	5960	12	Ac. Argininosucc.	16950	20	46	5	51
Ac. Aspartico	5960	12	Ac. Argininosucc.	16950	33	40	4	44
Ac. Aspartico	5960	12	Ac. Argininosucc.	16950	36	42	7	49
Ac. Aspartico	5960	12	Ac. Argininosucc.	16950	40	42	3	45
Ac. Aspartico	5960	12	Ac. Argininosucc.	16950	43	45	7	52
Ac. Aspartico	5960	12	Ac. Argininosucc.	16950	46	44	3	47
Ac. Aspartico	5960	12	Ac. Argininosucc.	16950	49	41	3	44
Ac. Aspartico	5960	12	Ac. Argininosucc.	16950	53	46	1	47
Ac. Aspartico	5960	12	Ac. Argininosucc.	16950	62	46	4	50
Ac. Aspartico	5960	1	Ac. Lactico	107689	1	76	27	103
Ac. Aspartico	5960	1	Ac. Lactico	107689	2	78	7	85
Ac. Aspartico	5960	1	Ac. Lactico	107689	3	78	8	86
Ac. Aspartico	5960	2	Ac. Lactico	107689	1	75	8	83
Ac. Aspartico	5960	2	Ac. Lactico	107689	2	78	7	85
Ac. Aspartico	5960	2	Ac. Lactico	107689	3	79	10	89
Ac. Aspartico	5960	3	Ac. Lactico	107689	1	70	3	73
Ac. Aspartico	5960	3	Ac. Lactico	107689	2	70	3	73
Ac. Aspartico	5960	3	Ac. Lactico	107689	3	72	8	80
Ac. Aspartico	5960	4	Ac. Lactico	107689	1	77	8	85
Ac. Aspartico	5960	4	Ac. Lactico	107689	2	78	6	84
Ac. Aspartico	5960	4	Ac. Lactico	107689	3	75	31	106
Ac. Aspartico	5960	5	Ac. Lactico	107689	1	78	22	100
Ac. Aspartico	5960	5	Ac. Lactico	107689	2	80	26	106
Ac. Aspartico	5960	5	Ac. Lactico	107689	3	76	11	87
Ac. Aspartico	5960	7	Ac. Lactico	107689	1	71	8	79
Ac. Aspartico	5960	7	Ac. Lactico	107689	2	71	30	101
Ac. Aspartico	5960	7	Ac. Lactico	107689	3	71	34	105
Ac. Aspartico	5960	8	Ac. Lactico	107689	1	71	9	80
Ac. Aspartico	5960	8	Ac. Lactico	107689	2	70	14	84
Ac. Aspartico	5960	8	Ac. Lactico	107689	3	68	7	75
Ac. Aspartico	5960	9	Ac. Lactico	107689	1	69	2	71
Ac. Aspartico	5960	9	Ac. Lactico	107689	2	72	3	75
Ac. Aspartico	5960	9	Ac. Lactico	107689	3	69	6	75
Ac. Aspartico	5960	11	Ac. Lactico	107689	1	78	8	86
Ac. Aspartico	5960	11	Ac. Lactico	107689	2	79	8	87
Ac. Aspartico	5960	11	Ac. Lactico	107689	3	73	8	81
Ac. Aspartico	5960	12	Ac. Lactico	107689	1	79	18	97
Ac. Aspartico	5960	12	Ac. Lactico	107689	2	76	16	92
Ac. Aspartico	5960	12	Ac. Lactico	107689	3	77	16	93
Ac. Aspartico	5960	1	Agmatina	199	1	65	0	65
Ac. Aspartico	5960	1	Agmatina	199	3	60	0	60
Ac. Aspartico	5960	1	Agmatina	199	5	60	0	60
Ac. Aspartico	5960	1	Agmatina	199	30	78	0	78
Ac. Aspartico	5960	1	Agmatina	199	32	84	0	84
Ac. Aspartico	5960	1	Agmatina	199	34	79	0	79
Ac. Aspartico	5960	1	Agmatina	199	40	75	9	84
Ac. Aspartico	5960	1	Agmatina	199	48	71	1	72
Ac. Aspartico	5960	1	Agmatina	199	49	77	0	77
Ac. Aspartico	5960	1	Agmatina	199	50	74	16	90
Ac. Aspartico	5960	2	Agmatina	199	1	71	0	71
Ac. Aspartico	5960	2	Agmatina	199	3	64	0	64
Ac. Aspartico	5960	2	Agmatina	199	5	65	0	65
Ac. Aspartico	5960	2	Agmatina	199	30	78	0	78
Ac. Aspartico	5960	2	Agmatina	199	32	78	0	78
Ac. Aspartico	5960	2	Agmatina	199	34	82	0	82
Ac. Aspartico	5960	2	Agmatina	199	40	75	8	83
Ac. Aspartico	5960	2	Agmatina	199	48	77	0	77
Ac. Aspartico	5960	2	Agmatina	199	49	81	0	81
Ac. Aspartico	5960	2	Agmatina	199	50	79	4	83
Ac. Aspartico	5960	3	Agmatina	199	1	78	0	78
Ac. Aspartico	5960	3	Agmatina	199	3	74	0	74
Ac. Aspartico	5960	3	Agmatina	199	5	76	0	76
Ac. Aspartico	5960	3	Agmatina	199	30	73	0	73
Ac. Aspartico	5960	3	Agmatina	199	32	74	5	79
Ac. Aspartico	5960	3	Agmatina	199	34	74	3	77
Ac. Aspartico	5960	3	Agmatina	199	40	80	0	80
Ac. Aspartico	5960	3	Agmatina	199	48	76	1	77
Ac. Aspartico	5960	3	Agmatina	199	49	84	0	84
Ac. Aspartico	5960	3	Agmatina	199	50	88	0	88
Ac. Aspartico	5960	4	Agmatina	199	1	66	0	66
Ac. Aspartico	5960	4	Agmatina	199	3	61	0	61
Ac. Aspartico	5960	4	Agmatina	199	5	61	0	61
Ac. Aspartico	5960	4	Agmatina	199	30	77	0	77
Ac. Aspartico	5960	4	Agmatina	199	32	82	0	82
Ac. Aspartico	5960	4	Agmatina	199	34	83	0	83
Ac. Aspartico	5960	4	Agmatina	199	40	77	7	84
Ac. Aspartico	5960	4	Agmatina	199	48	74	0	74
Ac. Aspartico	5960	4	Agmatina	199	49	81	0	81
Ac. Aspartico	5960	4	Agmatina	199	50	72	18	90
Ac. Aspartico	5960	5	Agmatina	199	1	67	0	67
Ac. Aspartico	5960	5	Agmatina	199	3	60	0	60
Ac. Aspartico	5960	5	Agmatina	199	5	60	0	60
Ac. Aspartico	5960	5	Agmatina	199	30	75	0	75
Ac. Aspartico	5960	5	Agmatina	199	32	74	2	76
Ac. Aspartico	5960	5	Agmatina	199	34	65	0	65
Ac. Aspartico	5960	5	Agmatina	199	40	80	0	80
Ac. Aspartico	5960	5	Agmatina	199	48	65	0	65
Ac. Aspartico	5960	5	Agmatina	199	49	76	0	76
Ac. Aspartico	5960	5	Agmatina	199	50	76	0	76
Ac. Aspartico	5960	7	Agmatina	199	1	80	0	80
Ac. Aspartico	5960	7	Agmatina	199	3	75	0	75
Ac. Aspartico	5960	7	Agmatina	199	5	77	0	77
Ac. Aspartico	5960	7	Agmatina	199	30	83	0	83
Ac. Aspartico	5960	7	Agmatina	199	32	73	0	73
Ac. Aspartico	5960	7	Agmatina	199	34	80	0	80
Ac. Aspartico	5960	7	Agmatina	199	40	79	0	79
Ac. Aspartico	5960	7	Agmatina	199	48	84	0	84
Ac. Aspartico	5960	7	Agmatina	199	49	83	0	83
Ac. Aspartico	5960	7	Agmatina	199	50	82	0	82
Ac. Aspartico	5960	8	Agmatina	199	1	75	0	75
Ac. Aspartico	5960	8	Agmatina	199	3	73	0	73
Ac. Aspartico	5960	8	Agmatina	199	5	76	0	76
Ac. Aspartico	5960	8	Agmatina	199	30	73	0	73
Ac. Aspartico	5960	8	Agmatina	199	32	69	0	69
Ac. Aspartico	5960	8	Agmatina	199	34	72	0	72
Ac. Aspartico	5960	8	Agmatina	199	40	82	0	82
Ac. Aspartico	5960	8	Agmatina	199	48	81	0	81
Ac. Aspartico	5960	8	Agmatina	199	49	78	3	81
Ac. Aspartico	5960	8	Agmatina	199	50	80	0	80
Ac. Aspartico	5960	9	Agmatina	199	1	76	0	76
Ac. Aspartico	5960	9	Agmatina	199	3	74	0	74
Ac. Aspartico	5960	9	Agmatina	199	5	77	0	77
Ac. Aspartico	5960	9	Agmatina	199	30	72	0	72
Ac. Aspartico	5960	9	Agmatina	199	32	72	4	76
Ac. Aspartico	5960	9	Agmatina	199	34	70	0	70
Ac. Aspartico	5960	9	Agmatina	199	40	81	0	81
Ac. Aspartico	5960	9	Agmatina	199	48	76	0	76
Ac. Aspartico	5960	9	Agmatina	199	49	80	0	80
Ac. Aspartico	5960	9	Agmatina	199	50	85	0	85
Ac. Aspartico	5960	11	Agmatina	199	1	71	0	71
Ac. Aspartico	5960	11	Agmatina	199	3	68	0	68
Ac. Aspartico	5960	11	Agmatina	199	5	69	0	69
Ac. Aspartico	5960	11	Agmatina	199	30	72	0	72
Ac. Aspartico	5960	11	Agmatina	199	32	77	0	77
Ac. Aspartico	5960	11	Agmatina	199	34	80	0	80
Ac. Aspartico	5960	11	Agmatina	199	40	80	10	90
Ac. Aspartico	5960	11	Agmatina	199	48	79	0	79
Ac. Aspartico	5960	11	Agmatina	199	49	78	0	78
Ac. Aspartico	5960	11	Agmatina	199	50	77	15	92
Ac. Aspartico	5960	12	Agmatina	199	1	71	0	71
Ac. Aspartico	5960	12	Agmatina	199	3	69	0	69
Ac. Aspartico	5960	12	Agmatina	199	5	69	0	69
Ac. Aspartico	5960	12	Agmatina	199	30	77	0	77
Ac. Aspartico	5960	12	Agmatina	199	32	81	0	81
Ac. Aspartico	5960	12	Agmatina	199	34	73	0	73
Ac. Aspartico	5960	12	Agmatina	199	40	84	16	100
Ac. Aspartico	5960	12	Agmatina	199	48	76	0	76
Ac. Aspartico	5960	12	Agmatina	199	49	81	0	81
Ac. Aspartico	5960	12	Agmatina	199	50	78	3	81
Ac. Aspartico	5960	1	Arginina	6322	4	56	2	58
Ac. Aspartico	5960	1	Arginina	6322	12	66	3	69
Ac. Aspartico	5960	1	Arginina	6322	17	46	0	46
Ac. Aspartico	5960	1	Arginina	6322	27	52	5	57
Ac. Aspartico	5960	1	Arginina	6322	38	60	1	61
Ac. Aspartico	5960	1	Arginina	6322	58	55	5	60
Ac. Aspartico	5960	1	Arginina	6322	63	69	5	74
Ac. Aspartico	5960	1	Arginina	6322	72	82	21	103
Ac. Aspartico	5960	1	Arginina	6322	83	70	12	82
Ac. Aspartico	5960	1	Arginina	6322	96	81	0	81
Ac. Aspartico	5960	2	Arginina	6322	4	61	3	64
Ac. Aspartico	5960	2	Arginina	6322	12	65	3	68
Ac. Aspartico	5960	2	Arginina	6322	17	49	0	49
Ac. Aspartico	5960	2	Arginina	6322	27	55	11	66
Ac. Aspartico	5960	2	Arginina	6322	38	60	1	61
Ac. Aspartico	5960	2	Arginina	6322	58	59	8	67
Ac. Aspartico	5960	2	Arginina	6322	63	73	2	75
Ac. Aspartico	5960	2	Arginina	6322	72	83	5	88
Ac. Aspartico	5960	2	Arginina	6322	83	71	14	85
Ac. Aspartico	5960	2	Arginina	6322	96	76	4	80
Ac. Aspartico	5960	3	Arginina	6322	4	68	4	72
Ac. Aspartico	5960	3	Arginina	6322	12	68	4	72
Ac. Aspartico	5960	3	Arginina	6322	17	61	2	63
Ac. Aspartico	5960	3	Arginina	6322	27	63	2	65
Ac. Aspartico	5960	3	Arginina	6322	38	64	5	69
Ac. Aspartico	5960	3	Arginina	6322	58	67	4	71
Ac. Aspartico	5960	3	Arginina	6322	63	68	13	81
Ac. Aspartico	5960	3	Arginina	6322	72	73	0	73
Ac. Aspartico	5960	3	Arginina	6322	83	70	2	72
Ac. Aspartico	5960	3	Arginina	6322	96	71	8	79
Ac. Aspartico	5960	4	Arginina	6322	4	57	11	68
Ac. Aspartico	5960	4	Arginina	6322	12	66	2	68
Ac. Aspartico	5960	4	Arginina	6322	17	50	4	54
Ac. Aspartico	5960	4	Arginina	6322	27	49	2	51
Ac. Aspartico	5960	4	Arginina	6322	38	62	0	62
Ac. Aspartico	5960	4	Arginina	6322	58	58	20	78
Ac. Aspartico	5960	4	Arginina	6322	63	72	9	81
Ac. Aspartico	5960	4	Arginina	6322	72	78	18	96
Ac. Aspartico	5960	4	Arginina	6322	83	77	8	85
Ac. Aspartico	5960	4	Arginina	6322	96	73	0	73
Ac. Aspartico	5960	5	Arginina	6322	4	56	0	56
Ac. Aspartico	5960	5	Arginina	6322	12	64	22	86
Ac. Aspartico	5960	5	Arginina	6322	17	56	22	78
Ac. Aspartico	5960	5	Arginina	6322	27	57	32	89
Ac. Aspartico	5960	5	Arginina	6322	38	53	1	54
Ac. Aspartico	5960	5	Arginina	6322	58	55	7	62
Ac. Aspartico	5960	5	Arginina	6322	63	62	0	62
Ac. Aspartico	5960	5	Arginina	6322	72	71	14	85
Ac. Aspartico	5960	5	Arginina	6322	83	72	6	78
Ac. Aspartico	5960	5	Arginina	6322	96	76	0	76
Ac. Aspartico	5960	7	Arginina	6322	4	67	4	71
Ac. Aspartico	5960	7	Arginina	6322	12	75	5	80
Ac. Aspartico	5960	7	Arginina	6322	17	61	0	61
Ac. Aspartico	5960	7	Arginina	6322	27	68	3	71
Ac. Aspartico	5960	7	Arginina	6322	38	72	6	78
Ac. Aspartico	5960	7	Arginina	6322	58	65	4	69
Ac. Aspartico	5960	7	Arginina	6322	63	69	11	80
Ac. Aspartico	5960	7	Arginina	6322	72	74	3	77
Ac. Aspartico	5960	7	Arginina	6322	83	79	3	82
Ac. Aspartico	5960	7	Arginina	6322	96	70	12	82
Ac. Aspartico	5960	8	Arginina	6322	4	63	2	65
Ac. Aspartico	5960	8	Arginina	6322	12	68	4	72
Ac. Aspartico	5960	8	Arginina	6322	17	59	1	60
Ac. Aspartico	5960	8	Arginina	6322	27	67	1	68
Ac. Aspartico	5960	8	Arginina	6322	38	69	34	103
Ac. Aspartico	5960	8	Arginina	6322	58	65	3	68
Ac. Aspartico	5960	8	Arginina	6322	63	65	4	69
Ac. Aspartico	5960	8	Arginina	6322	72	68	5	73
Ac. Aspartico	5960	8	Arginina	6322	83	75	0	75
Ac. Aspartico	5960	8	Arginina	6322	96	76	7	83
Ac. Aspartico	5960	9	Arginina	6322	4	67	3	70
Ac. Aspartico	5960	9	Arginina	6322	12	69	4	73
Ac. Aspartico	5960	9	Arginina	6322	17	61	3	64
Ac. Aspartico	5960	9	Arginina	6322	27	65	0	65
Ac. Aspartico	5960	9	Arginina	6322	38	63	0	63
Ac. Aspartico	5960	9	Arginina	6322	58	70	4	74
Ac. Aspartico	5960	9	Arginina	6322	63	65	5	70
Ac. Aspartico	5960	9	Arginina	6322	72	71	1	72
Ac. Aspartico	5960	9	Arginina	6322	83	72	0	72
Ac. Aspartico	5960	9	Arginina	6322	96	76	7	83
Ac. Aspartico	5960	11	Arginina	6322	4	62	8	70
Ac. Aspartico	5960	11	Arginina	6322	12	66	5	71
Ac. Aspartico	5960	11	Arginina	6322	17	57	4	61
Ac. Aspartico	5960	11	Arginina	6322	27	59	20	79
Ac. Aspartico	5960	11	Arginina	6322	38	68	1	69
Ac. Aspartico	5960	11	Arginina	6322	58	61	16	77
Ac. Aspartico	5960	11	Arginina	6322	63	72	10	82
Ac. Aspartico	5960	11	Arginina	6322	72	77	7	84
Ac. Aspartico	5960	11	Arginina	6322	83	75	5	80
Ac. Aspartico	5960	11	Arginina	6322	96	71	0	71
Ac. Aspartico	5960	12	Arginina	6322	4	60	0	60
Ac. Aspartico	5960	12	Arginina	6322	12	63	9	72
Ac. Aspartico	5960	12	Arginina	6322	17	57	4	61
Ac. Aspartico	5960	12	Arginina	6322	27	61	18	79
Ac. Aspartico	5960	12	Arginina	6322	38	62	1	63
Ac. Aspartico	5960	12	Arginina	6322	58	63	21	84
Ac. Aspartico	5960	12	Arginina	6322	63	66	3	69
Ac. Aspartico	5960	12	Arginina	6322	72	74	3	77
Ac. Aspartico	5960	12	Arginina	6322	83	76	7	83
Ac. Aspartico	5960	12	Arginina	6322	96	67	11	78
Ac. Aspartico	5960	1	Buformina	2468	1	65	9	74
Ac. Aspartico	5960	1	Buformina	2468	21	75	1	76
Ac. Aspartico	5960	1	Buformina	2468	34	72	0	72
Ac. Aspartico	5960	1	Buformina	2468	42	65	3	68
Ac. Aspartico	5960	1	Buformina	2468	47	65	2	67
Ac. Aspartico	5960	1	Buformina	2468	49	58	0	58
Ac. Aspartico	5960	1	Buformina	2468	50	70	10	80
Ac. Aspartico	5960	1	Buformina	2468	54	63	0	63
Ac. Aspartico	5960	1	Buformina	2468	55	74	0	74
Ac. Aspartico	5960	1	Buformina	2468	57	66	0	66
Ac. Aspartico	5960	2	Buformina	2468	1	63	7	70
Ac. Aspartico	5960	2	Buformina	2468	21	76	3	79
Ac. Aspartico	5960	2	Buformina	2468	34	74	0	74
Ac. Aspartico	5960	2	Buformina	2468	42	68	2	70
Ac. Aspartico	5960	2	Buformina	2468	47	70	2	72
Ac. Aspartico	5960	2	Buformina	2468	49	68	0	68
Ac. Aspartico	5960	2	Buformina	2468	50	74	9	83
Ac. Aspartico	5960	2	Buformina	2468	54	67	0	67
Ac. Aspartico	5960	2	Buformina	2468	55	80	3	83
Ac. Aspartico	5960	2	Buformina	2468	57	70	0	70
Ac. Aspartico	5960	3	Buformina	2468	1	74	7	81
Ac. Aspartico	5960	3	Buformina	2468	21	68	0	68
Ac. Aspartico	5960	3	Buformina	2468	34	75	9	84
Ac. Aspartico	5960	3	Buformina	2468	42	69	1	70
Ac. Aspartico	5960	3	Buformina	2468	47	75	0	75
Ac. Aspartico	5960	3	Buformina	2468	49	74	6	80
Ac. Aspartico	5960	3	Buformina	2468	50	82	7	89
Ac. Aspartico	5960	3	Buformina	2468	54	78	5	83
Ac. Aspartico	5960	3	Buformina	2468	55	72	0	72
Ac. Aspartico	5960	3	Buformina	2468	57	74	3	77
Ac. Aspartico	5960	4	Buformina	2468	1	68	8	76
Ac. Aspartico	5960	4	Buformina	2468	21	74	0	74
Ac. Aspartico	5960	4	Buformina	2468	34	78	0	78
Ac. Aspartico	5960	4	Buformina	2468	42	64	3	67
Ac. Aspartico	5960	4	Buformina	2468	47	66	1	67
Ac. Aspartico	5960	4	Buformina	2468	49	68	0	68
Ac. Aspartico	5960	4	Buformina	2468	50	76	10	86
Ac. Aspartico	5960	4	Buformina	2468	54	64	0	64
Ac. Aspartico	5960	4	Buformina	2468	55	76	5	81
Ac. Aspartico	5960	4	Buformina	2468	57	65	0	65
Ac. Aspartico	5960	5	Buformina	2468	1	68	0	68
Ac. Aspartico	5960	5	Buformina	2468	21	75	7	82
Ac. Aspartico	5960	5	Buformina	2468	34	65	6	71
Ac. Aspartico	5960	5	Buformina	2468	42	63	0	63
Ac. Aspartico	5960	5	Buformina	2468	47	65	0	65
Ac. Aspartico	5960	5	Buformina	2468	49	61	2	63
Ac. Aspartico	5960	5	Buformina	2468	50	76	9	85
Ac. Aspartico	5960	5	Buformina	2468	54	65	4	69
Ac. Aspartico	5960	5	Buformina	2468	55	70	6	76
Ac. Aspartico	5960	5	Buformina	2468	57	69	5	74
Ac. Aspartico	5960	7	Buformina	2468	1	72	0	72
Ac. Aspartico	5960	7	Buformina	2468	21	74	0	74
Ac. Aspartico	5960	7	Buformina	2468	34	81	9	90
Ac. Aspartico	5960	7	Buformina	2468	42	71	0	71
Ac. Aspartico	5960	7	Buformina	2468	47	77	0	77
Ac. Aspartico	5960	7	Buformina	2468	49	74	2	76
Ac. Aspartico	5960	7	Buformina	2468	50	75	4	79
Ac. Aspartico	5960	7	Buformina	2468	54	75	0	75
Ac. Aspartico	5960	7	Buformina	2468	55	78	6	84
Ac. Aspartico	5960	7	Buformina	2468	57	72	0	72
Ac. Aspartico	5960	8	Buformina	2468	1	75	2	77
Ac. Aspartico	5960	8	Buformina	2468	21	73	2	75
Ac. Aspartico	5960	8	Buformina	2468	34	72	4	76
Ac. Aspartico	5960	8	Buformina	2468	42	72	0	72
Ac. Aspartico	5960	8	Buformina	2468	47	77	0	77
Ac. Aspartico	5960	8	Buformina	2468	49	71	4	75
Ac. Aspartico	5960	8	Buformina	2468	50	81	7	88
Ac. Aspartico	5960	8	Buformina	2468	54	76	7	83
Ac. Aspartico	5960	8	Buformina	2468	55	73	3	76
Ac. Aspartico	5960	8	Buformina	2468	57	75	5	80
Ac. Aspartico	5960	9	Buformina	2468	1	80	8	88
Ac. Aspartico	5960	9	Buformina	2468	21	69	0	69
Ac. Aspartico	5960	9	Buformina	2468	34	69	0	69
Ac. Aspartico	5960	9	Buformina	2468	42	72	0	72
Ac. Aspartico	5960	9	Buformina	2468	47	76	0	76
Ac. Aspartico	5960	9	Buformina	2468	49	74	8	82
Ac. Aspartico	5960	9	Buformina	2468	50	75	9	84
Ac. Aspartico	5960	9	Buformina	2468	54	74	5	79
Ac. Aspartico	5960	9	Buformina	2468	55	74	0	74
Ac. Aspartico	5960	9	Buformina	2468	57	77	7	84
Ac. Aspartico	5960	11	Buformina	2468	1	69	7	76
Ac. Aspartico	5960	11	Buformina	2468	21	72	0	72
Ac. Aspartico	5960	11	Buformina	2468	34	78	0	78
Ac. Aspartico	5960	11	Buformina	2468	42	69	2	71
Ac. Aspartico	5960	11	Buformina	2468	47	71	2	73
Ac. Aspartico	5960	11	Buformina	2468	49	72	0	72
Ac. Aspartico	5960	11	Buformina	2468	50	80	11	91
Ac. Aspartico	5960	11	Buformina	2468	54	72	0	72
Ac. Aspartico	5960	11	Buformina	2468	55	77	6	83
Ac. Aspartico	5960	11	Buformina	2468	57	69	0	69
Ac. Aspartico	5960	12	Buformina	2468	1	63	0	63
Ac. Aspartico	5960	12	Buformina	2468	21	80	9	89
Ac. Aspartico	5960	12	Buformina	2468	34	73	0	73
Ac. Aspartico	5960	12	Buformina	2468	42	71	4	75
Ac. Aspartico	5960	12	Buformina	2468	47	73	5	78
Ac. Aspartico	5960	12	Buformina	2468	49	67	0	67
Ac. Aspartico	5960	12	Buformina	2468	50	76	0	76
Ac. Aspartico	5960	12	Buformina	2468	54	72	0	72
Ac. Aspartico	5960	12	Buformina	2468	55	76	7	83
Ac. Aspartico	5960	12	Buformina	2468	57	71	0	71
Ac. Aspartico	5960	1	Cadaverina	273	1	60	0	60
Ac. Aspartico	5960	1	Cadaverina	273	2	66	15	81
Ac. Aspartico	5960	1	Cadaverina	273	5	76	0	76
Ac. Aspartico	5960	1	Cadaverina	273	8	80	0	80
Ac. Aspartico	5960	1	Cadaverina	273	10	74	0	74
Ac. Aspartico	5960	1	Cadaverina	273	13	75	11	86
Ac. Aspartico	5960	1	Cadaverina	273	14	76	13	89
Ac. Aspartico	5960	1	Cadaverina	273	15	84	0	84
Ac. Aspartico	5960	1	Cadaverina	273	16	78	0	78
Ac. Aspartico	5960	1	Cadaverina	273	17	80	0	80
Ac. Aspartico	5960	2	Cadaverina	273	1	67	0	67
Ac. Aspartico	5960	2	Cadaverina	273	2	69	8	77
Ac. Aspartico	5960	2	Cadaverina	273	5	77	0	77
Ac. Aspartico	5960	2	Cadaverina	273	8	81	0	81
Ac. Aspartico	5960	2	Cadaverina	273	10	81	0	81
Ac. Aspartico	5960	2	Cadaverina	273	13	73	13	86
Ac. Aspartico	5960	2	Cadaverina	273	14	79	17	96
Ac. Aspartico	5960	2	Cadaverina	273	15	84	0	84
Ac. Aspartico	5960	2	Cadaverina	273	16	83	0	83
Ac. Aspartico	5960	2	Cadaverina	273	17	75	0	75
Ac. Aspartico	5960	3	Cadaverina	273	1	76	0	76
Ac. Aspartico	5960	3	Cadaverina	273	2	82	0	82
Ac. Aspartico	5960	3	Cadaverina	273	5	84	0	84
Ac. Aspartico	5960	3	Cadaverina	273	8	80	0	80
Ac. Aspartico	5960	3	Cadaverina	273	10	84	0	84
Ac. Aspartico	5960	3	Cadaverina	273	13	82	0	82
Ac. Aspartico	5960	3	Cadaverina	273	14	84	0	84
Ac. Aspartico	5960	3	Cadaverina	273	15	78	1	79
Ac. Aspartico	5960	3	Cadaverina	273	16	80	0	80
Ac. Aspartico	5960	3	Cadaverina	273	17	84	0	84
Ac. Aspartico	5960	4	Cadaverina	273	1	64	0	64
Ac. Aspartico	5960	4	Cadaverina	273	2	68	11	79
Ac. Aspartico	5960	4	Cadaverina	273	5	68	10	78
Ac. Aspartico	5960	4	Cadaverina	273	8	79	0	79
Ac. Aspartico	5960	4	Cadaverina	273	10	73	0	73
Ac. Aspartico	5960	4	Cadaverina	273	13	72	6	78
Ac. Aspartico	5960	4	Cadaverina	273	14	75	16	91
Ac. Aspartico	5960	4	Cadaverina	273	15	81	0	81
Ac. Aspartico	5960	4	Cadaverina	273	16	76	0	76
Ac. Aspartico	5960	4	Cadaverina	273	17	82	0	82
Ac. Aspartico	5960	5	Cadaverina	273	1	60	0	60
Ac. Aspartico	5960	5	Cadaverina	273	2	64	0	64
Ac. Aspartico	5960	5	Cadaverina	273	5	77	0	77
Ac. Aspartico	5960	5	Cadaverina	273	8	78	0	78
Ac. Aspartico	5960	5	Cadaverina	273	10	80	0	80
Ac. Aspartico	5960	5	Cadaverina	273	13	76	0	76
Ac. Aspartico	5960	5	Cadaverina	273	14	80	0	80
Ac. Aspartico	5960	5	Cadaverina	273	15	80	0	80
Ac. Aspartico	5960	5	Cadaverina	273	16	86	0	86
Ac. Aspartico	5960	5	Cadaverina	273	17	76	0	76
Ac. Aspartico	5960	7	Cadaverina	273	1	78	0	78
Ac. Aspartico	5960	7	Cadaverina	273	2	81	0	81
Ac. Aspartico	5960	7	Cadaverina	273	5	80	0	80
Ac. Aspartico	5960	7	Cadaverina	273	8	80	0	80
Ac. Aspartico	5960	7	Cadaverina	273	10	85	0	85
Ac. Aspartico	5960	7	Cadaverina	273	13	82	0	82
Ac. Aspartico	5960	7	Cadaverina	273	14	82	0	82
Ac. Aspartico	5960	7	Cadaverina	273	15	86	0	86
Ac. Aspartico	5960	7	Cadaverina	273	16	84	0	84
Ac. Aspartico	5960	7	Cadaverina	273	17	83	0	83
Ac. Aspartico	5960	8	Cadaverina	273	1	78	0	78
Ac. Aspartico	5960	8	Cadaverina	273	2	82	0	82
Ac. Aspartico	5960	8	Cadaverina	273	5	85	0	85
Ac. Aspartico	5960	8	Cadaverina	273	8	70	0	70
Ac. Aspartico	5960	8	Cadaverina	273	10	82	0	82
Ac. Aspartico	5960	8	Cadaverina	273	13	81	0	81
Ac. Aspartico	5960	8	Cadaverina	273	14	84	0	84
Ac. Aspartico	5960	8	Cadaverina	273	15	79	0	79
Ac. Aspartico	5960	8	Cadaverina	273	16	81	0	81
Ac. Aspartico	5960	8	Cadaverina	273	17	84	0	84
Ac. Aspartico	5960	9	Cadaverina	273	1	76	0	76
Ac. Aspartico	5960	9	Cadaverina	273	2	80	0	80
Ac. Aspartico	5960	9	Cadaverina	273	5	84	0	84
Ac. Aspartico	5960	9	Cadaverina	273	8	71	0	71
Ac. Aspartico	5960	9	Cadaverina	273	10	83	0	83
Ac. Aspartico	5960	9	Cadaverina	273	13	83	0	83
Ac. Aspartico	5960	9	Cadaverina	273	14	82	0	82
Ac. Aspartico	5960	9	Cadaverina	273	15	80	0	80
Ac. Aspartico	5960	9	Cadaverina	273	16	82	0	82
Ac. Aspartico	5960	9	Cadaverina	273	17	84	0	84
Ac. Aspartico	5960	11	Cadaverina	273	1	71	0	71
Ac. Aspartico	5960	11	Cadaverina	273	2	73	3	76
Ac. Aspartico	5960	11	Cadaverina	273	5	73	1	74
Ac. Aspartico	5960	11	Cadaverina	273	8	78	0	78
Ac. Aspartico	5960	11	Cadaverina	273	10	78	0	78
Ac. Aspartico	5960	11	Cadaverina	273	13	73	0	73
Ac. Aspartico	5960	11	Cadaverina	273	14	77	17	94
Ac. Aspartico	5960	11	Cadaverina	273	15	80	0	80
Ac. Aspartico	5960	11	Cadaverina	273	16	76	0	76
Ac. Aspartico	5960	11	Cadaverina	273	17	81	0	81
Ac. Aspartico	5960	12	Cadaverina	273	1	72	0	72
Ac. Aspartico	5960	12	Cadaverina	273	2	74	0	74
Ac. Aspartico	5960	12	Cadaverina	273	5	74	3	77
Ac. Aspartico	5960	12	Cadaverina	273	8	76	0	76
Ac. Aspartico	5960	12	Cadaverina	273	10	79	0	79
Ac. Aspartico	5960	12	Cadaverina	273	13	78	0	78
Ac. Aspartico	5960	12	Cadaverina	273	14	73	0	73
Ac. Aspartico	5960	12	Cadaverina	273	15	79	0	79
Ac. Aspartico	5960	12	Cadaverina	273	16	82	0	82
Ac. Aspartico	5960	12	Cadaverina	273	17	81	0	81
Ac. Aspartico	0	0	Caldohexamina	0	0	0	0	0
Ac. Aspartico	5960	1	Caldopentamina	83290	1	30	0	30
Ac. Aspartico	5960	1	Caldopentamina	83290	2	40	9	49
Ac. Aspartico	5960	1	Caldopentamina	83290	5	36	0	36
Ac. Aspartico	5960	1	Caldopentamina	83290	23	30	0	30
Ac. Aspartico	5960	1	Caldopentamina	83290	42	36	0	36
Ac. Aspartico	5960	1	Caldopentamina	83290	54	42	1	43
Ac. Aspartico	5960	1	Caldopentamina	83290	66	36	0	36
Ac. Aspartico	5960	1	Caldopentamina	83290	86	34	0	34
Ac. Aspartico	5960	1	Caldopentamina	83290	118	40	0	40
Ac. Aspartico	5960	1	Caldopentamina	83290	133	41	1	42
Ac. Aspartico	5960	2	Caldopentamina	83290	1	33	0	33
Ac. Aspartico	5960	2	Caldopentamina	83290	2	39	9	48
Ac. Aspartico	5960	2	Caldopentamina	83290	5	37	0	37
Ac. Aspartico	5960	2	Caldopentamina	83290	23	33	0	33
Ac. Aspartico	5960	2	Caldopentamina	83290	42	41	0	41
Ac. Aspartico	5960	2	Caldopentamina	83290	54	42	0	42
Ac. Aspartico	5960	2	Caldopentamina	83290	66	38	0	38
Ac. Aspartico	5960	2	Caldopentamina	83290	86	37	0	37
Ac. Aspartico	5960	2	Caldopentamina	83290	118	39	1	40
Ac. Aspartico	5960	2	Caldopentamina	83290	133	40	2	42
Ac. Aspartico	5960	3	Caldopentamina	83290	1	37	0	37
Ac. Aspartico	5960	3	Caldopentamina	83290	2	45	1	46
Ac. Aspartico	5960	3	Caldopentamina	83290	5	40	0	40
Ac. Aspartico	5960	3	Caldopentamina	83290	23	37	0	37
Ac. Aspartico	5960	3	Caldopentamina	83290	42	48	0	48
Ac. Aspartico	5960	3	Caldopentamina	83290	54	45	2	47
Ac. Aspartico	5960	3	Caldopentamina	83290	66	37	0	37
Ac. Aspartico	5960	3	Caldopentamina	83290	86	46	2	48
Ac. Aspartico	5960	3	Caldopentamina	83290	118	41	1	42
Ac. Aspartico	5960	3	Caldopentamina	83290	133	46	0	46
Ac. Aspartico	5960	4	Caldopentamina	83290	1	32	0	32
Ac. Aspartico	5960	4	Caldopentamina	83290	2	33	0	33
Ac. Aspartico	5960	4	Caldopentamina	83290	5	36	0	36
Ac. Aspartico	5960	4	Caldopentamina	83290	23	32	0	32
Ac. Aspartico	5960	4	Caldopentamina	83290	42	41	0	41
Ac. Aspartico	5960	4	Caldopentamina	83290	54	43	0	43
Ac. Aspartico	5960	4	Caldopentamina	83290	66	37	0	37
Ac. Aspartico	5960	4	Caldopentamina	83290	86	41	8	49
Ac. Aspartico	5960	4	Caldopentamina	83290	118	36	0	36
Ac. Aspartico	5960	4	Caldopentamina	83290	133	41	0	41
Ac. Aspartico	5960	5	Caldopentamina	83290	1	30	0	30
Ac. Aspartico	5960	5	Caldopentamina	83290	2	37	0	37
Ac. Aspartico	5960	5	Caldopentamina	83290	5	31	0	31
Ac. Aspartico	5960	5	Caldopentamina	83290	23	30	0	30
Ac. Aspartico	5960	5	Caldopentamina	83290	42	33	0	33
Ac. Aspartico	5960	5	Caldopentamina	83290	54	45	0	45
Ac. Aspartico	5960	5	Caldopentamina	83290	66	37	0	37
Ac. Aspartico	5960	5	Caldopentamina	83290	86	41	0	41
Ac. Aspartico	5960	5	Caldopentamina	83290	118	41	0	41
Ac. Aspartico	5960	5	Caldopentamina	83290	133	41	0	41
Ac. Aspartico	5960	7	Caldopentamina	83290	1	38	1	39
Ac. Aspartico	5960	7	Caldopentamina	83290	2	43	1	44
Ac. Aspartico	5960	7	Caldopentamina	83290	5	41	1	42
Ac. Aspartico	5960	7	Caldopentamina	83290	23	38	1	39
Ac. Aspartico	5960	7	Caldopentamina	83290	42	47	1	48
Ac. Aspartico	5960	7	Caldopentamina	83290	54	41	0	41
Ac. Aspartico	5960	7	Caldopentamina	83290	66	41	0	41
Ac. Aspartico	5960	7	Caldopentamina	83290	86	42	0	42
Ac. Aspartico	5960	7	Caldopentamina	83290	118	43	0	43
Ac. Aspartico	5960	7	Caldopentamina	83290	133	46	1	47
Ac. Aspartico	5960	8	Caldopentamina	83290	1	37	0	37
Ac. Aspartico	5960	8	Caldopentamina	83290	2	49	3	52
Ac. Aspartico	5960	8	Caldopentamina	83290	5	40	0	40
Ac. Aspartico	5960	8	Caldopentamina	83290	23	38	0	38
Ac. Aspartico	5960	8	Caldopentamina	83290	42	44	0	44
Ac. Aspartico	5960	8	Caldopentamina	83290	54	46	1	47
Ac. Aspartico	5960	8	Caldopentamina	83290	66	42	1	43
Ac. Aspartico	5960	8	Caldopentamina	83290	86	46	3	49
Ac. Aspartico	5960	8	Caldopentamina	83290	118	45	3	48
Ac. Aspartico	5960	8	Caldopentamina	83290	133	48	1	49
Ac. Aspartico	5960	9	Caldopentamina	83290	1	37	0	37
Ac. Aspartico	5960	9	Caldopentamina	83290	2	46	1	47
Ac. Aspartico	5960	9	Caldopentamina	83290	5	38	0	38
Ac. Aspartico	5960	9	Caldopentamina	83290	23	37	0	37
Ac. Aspartico	5960	9	Caldopentamina	83290	42	44	1	45
Ac. Aspartico	5960	9	Caldopentamina	83290	54	45	0	45
Ac. Aspartico	5960	9	Caldopentamina	83290	66	41	0	41
Ac. Aspartico	5960	9	Caldopentamina	83290	86	44	5	49
Ac. Aspartico	5960	9	Caldopentamina	83290	118	46	5	51
Ac. Aspartico	5960	9	Caldopentamina	83290	133	49	2	51
Ac. Aspartico	5960	11	Caldopentamina	83290	1	35	0	35
Ac. Aspartico	5960	11	Caldopentamina	83290	2	44	4	48
Ac. Aspartico	5960	11	Caldopentamina	83290	5	36	0	36
Ac. Aspartico	5960	11	Caldopentamina	83290	23	35	0	35
Ac. Aspartico	5960	11	Caldopentamina	83290	42	39	0	39
Ac. Aspartico	5960	11	Caldopentamina	83290	54	47	0	47
Ac. Aspartico	5960	11	Caldopentamina	83290	66	37	0	37
Ac. Aspartico	5960	11	Caldopentamina	83290	86	42	0	42
Ac. Aspartico	5960	11	Caldopentamina	83290	118	39	0	39
Ac. Aspartico	5960	11	Caldopentamina	83290	133	45	4	49
Ac. Aspartico	5960	12	Caldopentamina	83290	1	36	0	36
Ac. Aspartico	5960	12	Caldopentamina	83290	2	39	2	41
Ac. Aspartico	5960	12	Caldopentamina	83290	5	37	1	38
Ac. Aspartico	5960	12	Caldopentamina	83290	23	36	0	36
Ac. Aspartico	5960	12	Caldopentamina	83290	42	41	0	41
Ac. Aspartico	5960	12	Caldopentamina	83290	54	41	0	41
Ac. Aspartico	5960	12	Caldopentamina	83290	66	38	0	38
Ac. Aspartico	5960	12	Caldopentamina	83290	86	40	3	43
Ac. Aspartico	5960	12	Caldopentamina	83290	118	37	0	37
Ac. Aspartico	5960	12	Caldopentamina	83290	133	41	6	47
Ac. Aspartico	5960	1	Carbamoil fosfato	278	1	81	11	92
Ac. Aspartico	5960	1	Carbamoil fosfato	278	2	81	24	105
Ac. Aspartico	5960	1	Carbamoil fosfato	278	3	84	24	108
Ac. Aspartico	5960	1	Carbamoil fosfato	278	4	82	31	113
Ac. Aspartico	5960	1	Carbamoil fosfato	278	5	85	37	122
Ac. Aspartico	5960	1	Carbamoil fosfato	278	6	82	18	100
Ac. Aspartico	5960	2	Carbamoil fosfato	278	1	83	12	95
Ac. Aspartico	5960	2	Carbamoil fosfato	278	2	84	23	107
Ac. Aspartico	5960	2	Carbamoil fosfato	278	3	87	23	110
Ac. Aspartico	5960	2	Carbamoil fosfato	278	4	83	32	115
Ac. Aspartico	5960	2	Carbamoil fosfato	278	5	88	40	128
Ac. Aspartico	5960	2	Carbamoil fosfato	278	6	83	18	101
Ac. Aspartico	5960	3	Carbamoil fosfato	278	1	80	12	92
Ac. Aspartico	5960	3	Carbamoil fosfato	278	2	79	14	93
Ac. Aspartico	5960	3	Carbamoil fosfato	278	3	80	19	99
Ac. Aspartico	5960	3	Carbamoil fosfato	278	4	80	16	96
Ac. Aspartico	5960	3	Carbamoil fosfato	278	5	80	16	96
Ac. Aspartico	5960	3	Carbamoil fosfato	278	6	80	20	100
Ac. Aspartico	5960	4	Carbamoil fosfato	278	1	80	10	90
Ac. Aspartico	5960	4	Carbamoil fosfato	278	2	80	16	96
Ac. Aspartico	5960	4	Carbamoil fosfato	278	3	80	12	92
Ac. Aspartico	5960	4	Carbamoil fosfato	278	4	83	31	114
Ac. Aspartico	5960	4	Carbamoil fosfato	278	5	80	22	102
Ac. Aspartico	5960	4	Carbamoil fosfato	278	6	82	18	100
Ac. Aspartico	5960	5	Carbamoil fosfato	278	1	84	27	111
Ac. Aspartico	5960	5	Carbamoil fosfato	278	2	83	23	106
Ac. Aspartico	5960	5	Carbamoil fosfato	278	3	84	20	104
Ac. Aspartico	5960	5	Carbamoil fosfato	278	4	83	19	102
Ac. Aspartico	5960	5	Carbamoil fosfato	278	5	83	27	110
Ac. Aspartico	5960	5	Carbamoil fosfato	278	6	83	22	105
Ac. Aspartico	5960	7	Carbamoil fosfato	278	1	82	17	99
Ac. Aspartico	5960	7	Carbamoil fosfato	278	2	82	31	113
Ac. Aspartico	5960	7	Carbamoil fosfato	278	3	81	20	101
Ac. Aspartico	5960	7	Carbamoil fosfato	278	4	81	17	98
Ac. Aspartico	5960	7	Carbamoil fosfato	278	5	81	29	110
Ac. Aspartico	5960	7	Carbamoil fosfato	278	6	80	16	96
Ac. Aspartico	5960	8	Carbamoil fosfato	278	1	80	15	95
Ac. Aspartico	5960	8	Carbamoil fosfato	278	2	79	22	101
Ac. Aspartico	5960	8	Carbamoil fosfato	278	3	83	16	99
Ac. Aspartico	5960	8	Carbamoil fosfato	278	4	85	12	97
Ac. Aspartico	5960	8	Carbamoil fosfato	278	5	82	21	103
Ac. Aspartico	5960	8	Carbamoil fosfato	278	6	85	12	97
Ac. Aspartico	5960	9	Carbamoil fosfato	278	1	80	16	96
Ac. Aspartico	5960	9	Carbamoil fosfato	278	2	80	19	99
Ac. Aspartico	5960	9	Carbamoil fosfato	278	3	79	16	95
Ac. Aspartico	5960	9	Carbamoil fosfato	278	4	83	22	105
Ac. Aspartico	5960	9	Carbamoil fosfato	278	5	79	13	92
Ac. Aspartico	5960	9	Carbamoil fosfato	278	6	83	37	120
Ac. Aspartico	5960	11	Carbamoil fosfato	278	1	83	12	95
Ac. Aspartico	5960	11	Carbamoil fosfato	278	2	84	26	110
Ac. Aspartico	5960	11	Carbamoil fosfato	278	3	81	14	95
Ac. Aspartico	5960	11	Carbamoil fosfato	278	4	83	31	114
Ac. Aspartico	5960	11	Carbamoil fosfato	278	5	81	26	107
Ac. Aspartico	5960	11	Carbamoil fosfato	278	6	83	18	101
Ac. Aspartico	5960	12	Carbamoil fosfato	278	1	83	9	92
Ac. Aspartico	5960	12	Carbamoil fosfato	278	2	84	9	93
Ac. Aspartico	5960	12	Carbamoil fosfato	278	3	84	11	95
Ac. Aspartico	5960	12	Carbamoil fosfato	278	4	85	12	97
Ac. Aspartico	5960	12	Carbamoil fosfato	278	5	83	8	91
Ac. Aspartico	5960	12	Carbamoil fosfato	278	6	86	13	99
Ac. Aspartico	5960	1	Citrulina	9750	1	60	4	64
Ac. Aspartico	5960	1	Citrulina	9750	24	52	5	57
Ac. Aspartico	5960	1	Citrulina	9750	31	68	8	76
Ac. Aspartico	5960	1	Citrulina	9750	39	54	21	75
Ac. Aspartico	5960	1	Citrulina	9750	57	54	3	57
Ac. Aspartico	5960	1	Citrulina	9750	83	70	7	77
Ac. Aspartico	5960	1	Citrulina	9750	84	69	18	87
Ac. Aspartico	5960	1	Citrulina	9750	87	68	16	84
Ac. Aspartico	5960	1	Citrulina	9750	92	72	14	86
Ac. Aspartico	5960	1	Citrulina	9750	93	77	18	95
Ac. Aspartico	5960	2	Citrulina	9750	1	62	5	67
Ac. Aspartico	5960	2	Citrulina	9750	24	53	7	60
Ac. Aspartico	5960	2	Citrulina	9750	31	73	9	82
Ac. Aspartico	5960	2	Citrulina	9750	39	58	21	79
Ac. Aspartico	5960	2	Citrulina	9750	57	53	0	53
Ac. Aspartico	5960	2	Citrulina	9750	83	68	7	75
Ac. Aspartico	5960	2	Citrulina	9750	84	69	18	87
Ac. Aspartico	5960	2	Citrulina	9750	87	69	8	77
Ac. Aspartico	5960	2	Citrulina	9750	92	74	10	84
Ac. Aspartico	5960	2	Citrulina	9750	93	81	9	90
Ac. Aspartico	5960	3	Citrulina	9750	1	69	6	75
Ac. Aspartico	5960	3	Citrulina	9750	24	66	3	69
Ac. Aspartico	5960	3	Citrulina	9750	31	66	4	70
Ac. Aspartico	5960	3	Citrulina	9750	39	64	6	70
Ac. Aspartico	5960	3	Citrulina	9750	57	61	22	83
Ac. Aspartico	5960	3	Citrulina	9750	83	78	15	93
Ac. Aspartico	5960	3	Citrulina	9750	84	69	2	71
Ac. Aspartico	5960	3	Citrulina	9750	87	72	5	77
Ac. Aspartico	5960	3	Citrulina	9750	92	69	6	75
Ac. Aspartico	5960	3	Citrulina	9750	93	71	5	76
Ac. Aspartico	5960	4	Citrulina	9750	1	53	4	57
Ac. Aspartico	5960	4	Citrulina	9750	24	56	7	63
Ac. Aspartico	5960	4	Citrulina	9750	31	68	8	76
Ac. Aspartico	5960	4	Citrulina	9750	39	51	11	62
Ac. Aspartico	5960	4	Citrulina	9750	57	55	0	55
Ac. Aspartico	5960	4	Citrulina	9750	83	67	8	75
Ac. Aspartico	5960	4	Citrulina	9750	84	76	13	89
Ac. Aspartico	5960	4	Citrulina	9750	87	70	11	81
Ac. Aspartico	5960	4	Citrulina	9750	92	76	13	89
Ac. Aspartico	5960	4	Citrulina	9750	93	79	25	104
Ac. Aspartico	5960	5	Citrulina	9750	1	65	39	104
Ac. Aspartico	5960	5	Citrulina	9750	24	53	5	58
Ac. Aspartico	5960	5	Citrulina	9750	31	62	1	63
Ac. Aspartico	5960	5	Citrulina	9750	39	47	0	47
Ac. Aspartico	5960	5	Citrulina	9750	57	53	19	72
Ac. Aspartico	5960	5	Citrulina	9750	83	69	2	71
Ac. Aspartico	5960	5	Citrulina	9750	84	70	9	79
Ac. Aspartico	5960	5	Citrulina	9750	87	65	8	73
Ac. Aspartico	5960	5	Citrulina	9750	92	73	0	73
Ac. Aspartico	5960	5	Citrulina	9750	93	75	7	82
Ac. Aspartico	5960	7	Citrulina	9750	1	71	6	77
Ac. Aspartico	5960	7	Citrulina	9750	24	66	3	69
Ac. Aspartico	5960	7	Citrulina	9750	31	68	7	75
Ac. Aspartico	5960	7	Citrulina	9750	39	63	3	66
Ac. Aspartico	5960	7	Citrulina	9750	57	62	3	65
Ac. Aspartico	5960	7	Citrulina	9750	83	69	17	86
Ac. Aspartico	5960	7	Citrulina	9750	84	78	11	89
Ac. Aspartico	5960	7	Citrulina	9750	87	73	6	79
Ac. Aspartico	5960	7	Citrulina	9750	92	75	7	82
Ac. Aspartico	5960	7	Citrulina	9750	93	69	3	72
Ac. Aspartico	5960	8	Citrulina	9750	1	71	3	74
Ac. Aspartico	5960	8	Citrulina	9750	24	69	6	75
Ac. Aspartico	5960	8	Citrulina	9750	31	67	6	73
Ac. Aspartico	5960	8	Citrulina	9750	39	62	2	64
Ac. Aspartico	5960	8	Citrulina	9750	57	61	4	65
Ac. Aspartico	5960	8	Citrulina	9750	83	77	11	88
Ac. Aspartico	5960	8	Citrulina	9750	84	73	4	77
Ac. Aspartico	5960	8	Citrulina	9750	87	69	3	72
Ac. Aspartico	5960	8	Citrulina	9750	92	74	2	76
Ac. Aspartico	5960	8	Citrulina	9750	93	69	9	78
Ac. Aspartico	5960	9	Citrulina	9750	1	69	6	75
Ac. Aspartico	5960	9	Citrulina	9750	24	69	5	74
Ac. Aspartico	5960	9	Citrulina	9750	31	65	6	71
Ac. Aspartico	5960	9	Citrulina	9750	39	63	3	66
Ac. Aspartico	5960	9	Citrulina	9750	57	64	40	104
Ac. Aspartico	5960	9	Citrulina	9750	83	75	7	82
Ac. Aspartico	5960	9	Citrulina	9750	84	70	7	77
Ac. Aspartico	5960	9	Citrulina	9750	87	71	11	82
Ac. Aspartico	5960	9	Citrulina	9750	92	74	4	78
Ac. Aspartico	5960	9	Citrulina	9750	93	67	3	70
Ac. Aspartico	5960	11	Citrulina	9750	1	60	14	74
Ac. Aspartico	5960	11	Citrulina	9750	24	59	6	65
Ac. Aspartico	5960	11	Citrulina	9750	31	69	10	79
Ac. Aspartico	5960	11	Citrulina	9750	39	55	10	65
Ac. Aspartico	5960	11	Citrulina	9750	57	57	3	60
Ac. Aspartico	5960	11	Citrulina	9750	83	69	10	79
Ac. Aspartico	5960	11	Citrulina	9750	84	74	8	82
Ac. Aspartico	5960	11	Citrulina	9750	87	69	9	78
Ac. Aspartico	5960	11	Citrulina	9750	92	75	6	81
Ac. Aspartico	5960	11	Citrulina	9750	93	76	8	84
Ac. Aspartico	5960	12	Citrulina	9750	1	65	21	86
Ac. Aspartico	5960	12	Citrulina	9750	24	59	6	65
Ac. Aspartico	5960	12	Citrulina	9750	31	65	3	68
Ac. Aspartico	5960	12	Citrulina	9750	39	61	29	90
Ac. Aspartico	5960	12	Citrulina	9750	57	56	4	60
Ac. Aspartico	5960	12	Citrulina	9750	83	69	17	86
Ac. Aspartico	5960	12	Citrulina	9750	84	75	9	84
Ac. Aspartico	5960	12	Citrulina	9750	87	73	13	86
Ac. Aspartico	5960	12	Citrulina	9750	92	78	7	85
Ac. Aspartico	5960	12	Citrulina	9750	93	73	9	82
Ac. Aspartico	5960	1	Creatina	586	2	82	20	102
Ac. Aspartico	5960	1	Creatina	586	3	80	10	90
Ac. Aspartico	5960	1	Creatina	586	5	81	24	105
Ac. Aspartico	5960	1	Creatina	586	6	90	26	116
Ac. Aspartico	5960	1	Creatina	586	7	77	7	84
Ac. Aspartico	5960	1	Creatina	586	8	81	21	102
Ac. Aspartico	5960	1	Creatina	586	9	92	23	115
Ac. Aspartico	5960	1	Creatina	586	13	82	10	92
Ac. Aspartico	5960	1	Creatina	586	14	90	11	101
Ac. Aspartico	5960	1	Creatina	586	15	81	21	102
Ac. Aspartico	5960	2	Creatina	586	2	77	8	85
Ac. Aspartico	5960	2	Creatina	586	3	88	10	98
Ac. Aspartico	5960	2	Creatina	586	5	79	10	89
Ac. Aspartico	5960	2	Creatina	586	6	97	25	122
Ac. Aspartico	5960	2	Creatina	586	7	82	8	90
Ac. Aspartico	5960	2	Creatina	586	8	86	22	108
Ac. Aspartico	5960	2	Creatina	586	9	86	24	110
Ac. Aspartico	5960	2	Creatina	586	13	89	26	115
Ac. Aspartico	5960	2	Creatina	586	14	85	11	96
Ac. Aspartico	5960	2	Creatina	586	15	79	16	95
Ac. Aspartico	5960	3	Creatina	586	2	80	5	85
Ac. Aspartico	5960	3	Creatina	586	3	79	18	97
Ac. Aspartico	5960	3	Creatina	586	5	78	6	84
Ac. Aspartico	5960	3	Creatina	586	6	82	25	107
Ac. Aspartico	5960	3	Creatina	586	7	86	12	98
Ac. Aspartico	5960	3	Creatina	586	8	88	21	109
Ac. Aspartico	5960	3	Creatina	586	9	74	13	87
Ac. Aspartico	5960	3	Creatina	586	13	75	7	82
Ac. Aspartico	5960	3	Creatina	586	14	78	34	112
Ac. Aspartico	5960	3	Creatina	586	15	87	11	98
Ac. Aspartico	5960	4	Creatina	586	2	85	15	100
Ac. Aspartico	5960	4	Creatina	586	3	88	23	111
Ac. Aspartico	5960	4	Creatina	586	5	89	25	114
Ac. Aspartico	5960	4	Creatina	586	6	87	11	98
Ac. Aspartico	5960	4	Creatina	586	7	82	14	96
Ac. Aspartico	5960	4	Creatina	586	8	82	12	94
Ac. Aspartico	5960	4	Creatina	586	9	87	10	97
Ac. Aspartico	5960	4	Creatina	586	13	79	16	95
Ac. Aspartico	5960	4	Creatina	586	14	97	23	120
Ac. Aspartico	5960	4	Creatina	586	15	75	13	88
Ac. Aspartico	5960	5	Creatina	586	2	74	17	91
Ac. Aspartico	5960	5	Creatina	586	3	74	8	82
Ac. Aspartico	5960	5	Creatina	586	5	82	23	105
Ac. Aspartico	5960	5	Creatina	586	6	80	30	110
Ac. Aspartico	5960	5	Creatina	586	7	84	10	94
Ac. Aspartico	5960	5	Creatina	586	8	75	21	96
Ac. Aspartico	5960	5	Creatina	586	9	80	5	85
Ac. Aspartico	5960	5	Creatina	586	13	82	28	110
Ac. Aspartico	5960	5	Creatina	586	14	79	6	85
Ac. Aspartico	5960	5	Creatina	586	15	79	12	91
Ac. Aspartico	5960	7	Creatina	586	2	82	13	95
Ac. Aspartico	5960	7	Creatina	586	3	86	13	99
Ac. Aspartico	5960	7	Creatina	586	5	81	18	99
Ac. Aspartico	5960	7	Creatina	586	6	80	13	93
Ac. Aspartico	5960	7	Creatina	586	7	91	18	109
Ac. Aspartico	5960	7	Creatina	586	8	91	20	111
Ac. Aspartico	5960	7	Creatina	586	9	86	18	104
Ac. Aspartico	5960	7	Creatina	586	13	78	12	90
Ac. Aspartico	5960	7	Creatina	586	14	79	9	88
Ac. Aspartico	5960	7	Creatina	586	15	92	18	110
Ac. Aspartico	5960	8	Creatina	586	2	77	18	95
Ac. Aspartico	5960	8	Creatina	586	3	81	6	87
Ac. Aspartico	5960	8	Creatina	586	5	80	22	102
Ac. Aspartico	5960	8	Creatina	586	6	75	6	81
Ac. Aspartico	5960	8	Creatina	586	7	85	20	105
Ac. Aspartico	5960	8	Creatina	586	8	87	18	105
Ac. Aspartico	5960	8	Creatina	586	9	79	8	87
Ac. Aspartico	5960	8	Creatina	586	13	81	37	118
Ac. Aspartico	5960	8	Creatina	586	14	73	13	86
Ac. Aspartico	5960	8	Creatina	586	15	90	25	115
Ac. Aspartico	5960	9	Creatina	586	2	77	16	93
Ac. Aspartico	5960	9	Creatina	586	3	77	25	102
Ac. Aspartico	5960	9	Creatina	586	5	81	31	112
Ac. Aspartico	5960	9	Creatina	586	6	76	23	99
Ac. Aspartico	5960	9	Creatina	586	7	88	24	112
Ac. Aspartico	5960	9	Creatina	586	8	85	23	108
Ac. Aspartico	5960	9	Creatina	586	9	82	29	111
Ac. Aspartico	5960	9	Creatina	586	13	77	6	83
Ac. Aspartico	5960	9	Creatina	586	14	75	14	89
Ac. Aspartico	5960	9	Creatina	586	15	92	19	111
Ac. Aspartico	5960	11	Creatina	586	2	82	11	93
Ac. Aspartico	5960	11	Creatina	586	3	92	22	114
Ac. Aspartico	5960	11	Creatina	586	5	83	10	93
Ac. Aspartico	5960	11	Creatina	586	6	88	11	99
Ac. Aspartico	5960	11	Creatina	586	7	85	8	93
Ac. Aspartico	5960	11	Creatina	586	8	85	9	94
Ac. Aspartico	5960	11	Creatina	586	9	81	11	92
Ac. Aspartico	5960	11	Creatina	586	13	80	21	101
Ac. Aspartico	5960	11	Creatina	586	14	90	23	113
Ac. Aspartico	5960	11	Creatina	586	15	78	26	104
Ac. Aspartico	5960	12	Creatina	586	2	90	20	110
Ac. Aspartico	5960	12	Creatina	586	3	82	18	100
Ac. Aspartico	5960	12	Creatina	586	5	88	14	102
Ac. Aspartico	5960	12	Creatina	586	6	83	7	90
Ac. Aspartico	5960	12	Creatina	586	7	83	17	100
Ac. Aspartico	5960	12	Creatina	586	8	85	8	93
Ac. Aspartico	5960	12	Creatina	586	9	86	13	99
Ac. Aspartico	5960	12	Creatina	586	13	85	13	98
Ac. Aspartico	5960	12	Creatina	586	14	83	13	96
Ac. Aspartico	5960	12	Creatina	586	15	79	9	88
Ac. Aspartico	5960	1	ADMA	123831	1	46	4	50
Ac. Aspartico	5960	1	ADMA	123831	3	47	8	55
Ac. Aspartico	5960	1	ADMA	123831	22	52	0	52
Ac. Aspartico	5960	1	ADMA	123831	28	50	6	56
Ac. Aspartico	5960	1	ADMA	123831	40	64	0	64
Ac. Aspartico	5960	1	ADMA	123831	64	64	1	65
Ac. Aspartico	5960	1	ADMA	123831	81	74	18	92
Ac. Aspartico	5960	1	ADMA	123831	100	62	13	75
Ac. Aspartico	5960	1	ADMA	123831	110	60	19	79
Ac. Aspartico	5960	1	ADMA	123831	122	66	4	70
Ac. Aspartico	5960	2	ADMA	123831	1	47	0	47
Ac. Aspartico	5960	2	ADMA	123831	3	45	0	45
Ac. Aspartico	5960	2	ADMA	123831	22	53	0	53
Ac. Aspartico	5960	2	ADMA	123831	28	51	4	55
Ac. Aspartico	5960	2	ADMA	123831	40	68	2	70
Ac. Aspartico	5960	2	ADMA	123831	64	60	2	62
Ac. Aspartico	5960	2	ADMA	123831	81	78	6	84
Ac. Aspartico	5960	2	ADMA	123831	100	64	18	82
Ac. Aspartico	5960	2	ADMA	123831	110	60	10	70
Ac. Aspartico	5960	2	ADMA	123831	122	63	14	77
Ac. Aspartico	5960	3	ADMA	123831	1	59	0	59
Ac. Aspartico	5960	3	ADMA	123831	3	54	3	57
Ac. Aspartico	5960	3	ADMA	123831	22	57	2	59
Ac. Aspartico	5960	3	ADMA	123831	28	56	3	59
Ac. Aspartico	5960	3	ADMA	123831	40	59	0	59
Ac. Aspartico	5960	3	ADMA	123831	64	59	8	67
Ac. Aspartico	5960	3	ADMA	123831	81	68	0	68
Ac. Aspartico	5960	3	ADMA	123831	100	66	3	69
Ac. Aspartico	5960	3	ADMA	123831	110	67	6	73
Ac. Aspartico	5960	3	ADMA	123831	122	66	16	82
Ac. Aspartico	5960	4	ADMA	123831	1	53	0	53
Ac. Aspartico	5960	4	ADMA	123831	3	49	0	49
Ac. Aspartico	5960	4	ADMA	123831	22	50	0	50
Ac. Aspartico	5960	4	ADMA	123831	28	50	24	74
Ac. Aspartico	5960	4	ADMA	123831	40	59	0	59
Ac. Aspartico	5960	4	ADMA	123831	64	66	3	69
Ac. Aspartico	5960	4	ADMA	123831	81	71	8	79
Ac. Aspartico	5960	4	ADMA	123831	100	69	9	78
Ac. Aspartico	5960	4	ADMA	123831	110	55	0	55
Ac. Aspartico	5960	4	ADMA	123831	122	60	3	63
Ac. Aspartico	5960	5	ADMA	123831	1	49	4	53
Ac. Aspartico	5960	5	ADMA	123831	3	40	0	40
Ac. Aspartico	5960	5	ADMA	123831	22	45	0	45
Ac. Aspartico	5960	5	ADMA	123831	28	51	27	78
Ac. Aspartico	5960	5	ADMA	123831	40	65	3	68
Ac. Aspartico	5960	5	ADMA	123831	64	54	4	58
Ac. Aspartico	5960	5	ADMA	123831	81	66	9	75
Ac. Aspartico	5960	5	ADMA	123831	100	62	7	69
Ac. Aspartico	5960	5	ADMA	123831	110	60	8	68
Ac. Aspartico	5960	5	ADMA	123831	122	68	2	70
Ac. Aspartico	5960	7	ADMA	123831	1	60	4	64
Ac. Aspartico	5960	7	ADMA	123831	3	54	0	54
Ac. Aspartico	5960	7	ADMA	123831	22	55	3	58
Ac. Aspartico	5960	7	ADMA	123831	28	56	4	60
Ac. Aspartico	5960	7	ADMA	123831	40	68	4	72
Ac. Aspartico	5960	7	ADMA	123831	64	65	7	72
Ac. Aspartico	5960	7	ADMA	123831	81	67	6	73
Ac. Aspartico	5960	7	ADMA	123831	100	72	6	78
Ac. Aspartico	5960	7	ADMA	123831	110	66	7	73
Ac. Aspartico	5960	7	ADMA	123831	122	58	0	58
Ac. Aspartico	5960	8	ADMA	123831	1	59	1	60
Ac. Aspartico	5960	8	ADMA	123831	3	55	1	56
Ac. Aspartico	5960	8	ADMA	123831	22	55	2	57
Ac. Aspartico	5960	8	ADMA	123831	28	55	0	55
Ac. Aspartico	5960	8	ADMA	123831	40	62	4	66
Ac. Aspartico	5960	8	ADMA	123831	64	60	12	72
Ac. Aspartico	5960	8	ADMA	123831	81	65	0	65
Ac. Aspartico	5960	8	ADMA	123831	100	68	0	68
Ac. Aspartico	5960	8	ADMA	123831	110	67	10	77
Ac. Aspartico	5960	8	ADMA	123831	122	68	1	69
Ac. Aspartico	5960	9	ADMA	123831	1	58	2	60
Ac. Aspartico	5960	9	ADMA	123831	3	57	5	62
Ac. Aspartico	5960	9	ADMA	123831	22	56	0	56
Ac. Aspartico	5960	9	ADMA	123831	28	55	3	58
Ac. Aspartico	5960	9	ADMA	123831	40	58	4	62
Ac. Aspartico	5960	9	ADMA	123831	64	62	5	67
Ac. Aspartico	5960	9	ADMA	123831	81	67	1	68
Ac. Aspartico	5960	9	ADMA	123831	100	66	0	66
Ac. Aspartico	5960	9	ADMA	123831	110	70	7	77
Ac. Aspartico	5960	9	ADMA	123831	122	69	3	72
Ac. Aspartico	5960	11	ADMA	123831	1	57	0	57
Ac. Aspartico	5960	11	ADMA	123831	3	46	0	46
Ac. Aspartico	5960	11	ADMA	123831	22	52	0	52
Ac. Aspartico	5960	11	ADMA	123831	28	52	21	73
Ac. Aspartico	5960	11	ADMA	123831	40	61	15	76
Ac. Aspartico	5960	11	ADMA	123831	64	66	5	71
Ac. Aspartico	5960	11	ADMA	123831	81	72	4	76
Ac. Aspartico	5960	11	ADMA	123831	100	65	6	71
Ac. Aspartico	5960	11	ADMA	123831	110	61	2	63
Ac. Aspartico	5960	11	ADMA	123831	122	64	5	69
Ac. Aspartico	5960	12	ADMA	123831	1	50	0	50
Ac. Aspartico	5960	12	ADMA	123831	3	47	0	47
Ac. Aspartico	5960	12	ADMA	123831	22	53	0	53
Ac. Aspartico	5960	12	ADMA	123831	28	56	39	95
Ac. Aspartico	5960	12	ADMA	123831	40	59	1	60
Ac. Aspartico	5960	12	ADMA	123831	64	63	2	65
Ac. Aspartico	5960	12	ADMA	123831	81	67	3	70
Ac. Aspartico	5960	12	ADMA	123831	100	66	9	75
Ac. Aspartico	5960	12	ADMA	123831	110	62	0	62
Ac. Aspartico	5960	12	ADMA	123831	122	60	10	70
Ac. Aspartico	5960	1	SDMA	169148	1	55	1	56
Ac. Aspartico	5960	1	SDMA	169148	2	43	6	49
Ac. Aspartico	5960	1	SDMA	169148	6	45	6	51
Ac. Aspartico	5960	1	SDMA	169148	30	52	1	53
Ac. Aspartico	5960	1	SDMA	169148	34	62	3	65
Ac. Aspartico	5960	1	SDMA	169148	90	68	1	69
Ac. Aspartico	5960	1	SDMA	169148	145	48	0	48
Ac. Aspartico	5960	1	SDMA	169148	146	62	12	74
Ac. Aspartico	5960	1	SDMA	169148	148	65	16	81
Ac. Aspartico	5960	1	SDMA	169148	149	69	9	78
Ac. Aspartico	5960	2	SDMA	169148	1	57	2	59
Ac. Aspartico	5960	2	SDMA	169148	2	52	5	57
Ac. Aspartico	5960	2	SDMA	169148	6	53	5	58
Ac. Aspartico	5960	2	SDMA	169148	30	52	1	53
Ac. Aspartico	5960	2	SDMA	169148	34	66	4	70
Ac. Aspartico	5960	2	SDMA	169148	90	66	1	67
Ac. Aspartico	5960	2	SDMA	169148	145	52	0	52
Ac. Aspartico	5960	2	SDMA	169148	146	68	13	81
Ac. Aspartico	5960	2	SDMA	169148	148	65	10	75
Ac. Aspartico	5960	2	SDMA	169148	149	70	0	70
Ac. Aspartico	5960	3	SDMA	169148	1	59	3	62
Ac. Aspartico	5960	3	SDMA	169148	2	56	2	58
Ac. Aspartico	5960	3	SDMA	169148	6	54	0	54
Ac. Aspartico	5960	3	SDMA	169148	30	51	0	51
Ac. Aspartico	5960	3	SDMA	169148	34	63	4	67
Ac. Aspartico	5960	3	SDMA	169148	90	71	11	82
Ac. Aspartico	5960	3	SDMA	169148	145	57	12	69
Ac. Aspartico	5960	3	SDMA	169148	146	67	9	76
Ac. Aspartico	5960	3	SDMA	169148	148	68	7	75
Ac. Aspartico	5960	3	SDMA	169148	149	67	7	74
Ac. Aspartico	5960	4	SDMA	169148	1	59	4	63
Ac. Aspartico	5960	4	SDMA	169148	2	41	1	42
Ac. Aspartico	5960	4	SDMA	169148	6	40	0	40
Ac. Aspartico	5960	4	SDMA	169148	30	52	1	53
Ac. Aspartico	5960	4	SDMA	169148	34	60	2	62
Ac. Aspartico	5960	4	SDMA	169148	90	64	0	64
Ac. Aspartico	5960	4	SDMA	169148	145	54	0	54
Ac. Aspartico	5960	4	SDMA	169148	146	67	9	76
Ac. Aspartico	5960	4	SDMA	169148	148	62	3	65
Ac. Aspartico	5960	4	SDMA	169148	149	70	0	70
Ac. Aspartico	5960	5	SDMA	169148	1	51	0	51
Ac. Aspartico	5960	5	SDMA	169148	2	54	41	95
Ac. Aspartico	5960	5	SDMA	169148	6	39	0	39
Ac. Aspartico	5960	5	SDMA	169148	30	44	0	44
Ac. Aspartico	5960	5	SDMA	169148	34	57	24	81
Ac. Aspartico	5960	5	SDMA	169148	90	68	1	69
Ac. Aspartico	5960	5	SDMA	169148	145	51	1	52
Ac. Aspartico	5960	5	SDMA	169148	146	64	0	64
Ac. Aspartico	5960	5	SDMA	169148	148	65	4	69
Ac. Aspartico	5960	5	SDMA	169148	149	69	2	71
Ac. Aspartico	5960	7	SDMA	169148	1	60	4	64
Ac. Aspartico	5960	7	SDMA	169148	2	55	0	55
Ac. Aspartico	5960	7	SDMA	169148	6	53	1	54
Ac. Aspartico	5960	7	SDMA	169148	30	53	0	53
Ac. Aspartico	5960	7	SDMA	169148	34	67	5	72
Ac. Aspartico	5960	7	SDMA	169148	90	65	17	82
Ac. Aspartico	5960	7	SDMA	169148	145	61	1	62
Ac. Aspartico	5960	7	SDMA	169148	146	75	4	79
Ac. Aspartico	5960	7	SDMA	169148	148	69	8	77
Ac. Aspartico	5960	7	SDMA	169148	149	63	0	63
Ac. Aspartico	5960	8	SDMA	169148	1	58	2	60
Ac. Aspartico	5960	8	SDMA	169148	2	55	0	55
Ac. Aspartico	5960	8	SDMA	169148	6	55	0	55
Ac. Aspartico	5960	8	SDMA	169148	30	55	0	55
Ac. Aspartico	5960	8	SDMA	169148	34	58	3	61
Ac. Aspartico	5960	8	SDMA	169148	90	71	5	76
Ac. Aspartico	5960	8	SDMA	169148	145	58	1	59
Ac. Aspartico	5960	8	SDMA	169148	146	73	0	73
Ac. Aspartico	5960	8	SDMA	169148	148	67	16	83
Ac. Aspartico	5960	8	SDMA	169148	149	63	0	63
Ac. Aspartico	5960	9	SDMA	169148	1	57	2	59
Ac. Aspartico	5960	9	SDMA	169148	2	54	1	55
Ac. Aspartico	5960	9	SDMA	169148	6	56	5	61
Ac. Aspartico	5960	9	SDMA	169148	30	50	0	50
Ac. Aspartico	5960	9	SDMA	169148	34	63	6	69
Ac. Aspartico	5960	9	SDMA	169148	90	69	14	83
Ac. Aspartico	5960	9	SDMA	169148	145	60	29	89
Ac. Aspartico	5960	9	SDMA	169148	146	65	0	65
Ac. Aspartico	5960	9	SDMA	169148	148	69	5	74
Ac. Aspartico	5960	9	SDMA	169148	149	66	2	68
Ac. Aspartico	5960	11	SDMA	169148	1	58	7	65
Ac. Aspartico	5960	11	SDMA	169148	2	48	1	49
Ac. Aspartico	5960	11	SDMA	169148	6	46	0	46
Ac. Aspartico	5960	11	SDMA	169148	30	46	1	47
Ac. Aspartico	5960	11	SDMA	169148	34	58	2	60
Ac. Aspartico	5960	11	SDMA	169148	90	67	0	67
Ac. Aspartico	5960	11	SDMA	169148	145	58	0	58
Ac. Aspartico	5960	11	SDMA	169148	146	71	9	80
Ac. Aspartico	5960	11	SDMA	169148	148	61	3	64
Ac. Aspartico	5960	11	SDMA	169148	149	69	2	71
Ac. Aspartico	5960	12	SDMA	169148	1	55	2	57
Ac. Aspartico	5960	12	SDMA	169148	2	47	0	47
Ac. Aspartico	5960	12	SDMA	169148	6	46	0	46
Ac. Aspartico	5960	12	SDMA	169148	30	46	0	46
Ac. Aspartico	5960	12	SDMA	169148	34	56	5	61
Ac. Aspartico	5960	12	SDMA	169148	90	64	9	73
Ac. Aspartico	5960	12	SDMA	169148	145	57	0	57
Ac. Aspartico	5960	12	SDMA	169148	146	69	9	78
Ac. Aspartico	5960	12	SDMA	169148	148	62	3	65
Ac. Aspartico	5960	12	SDMA	169148	149	71	0	71
Ac. Aspartico	5960	1	Espermidina	1102	1	48	0	48
Ac. Aspartico	5960	1	Espermidina	1102	2	48	0	48
Ac. Aspartico	5960	1	Espermidina	1102	50	66	0	66
Ac. Aspartico	5960	1	Espermidina	1102	132	60	3	63
Ac. Aspartico	5960	1	Espermidina	1102	140	62	0	62
Ac. Aspartico	5960	1	Espermidina	1102	187	70	0	70
Ac. Aspartico	5960	1	Espermidina	1102	279	74	3	77
Ac. Aspartico	5960	1	Espermidina	1102	322	74	0	74
Ac. Aspartico	5960	1	Espermidina	1102	331	65	0	65
Ac. Aspartico	5960	1	Espermidina	1102	332	75	0	75
Ac. Aspartico	5960	2	Espermidina	1102	1	52	0	52
Ac. Aspartico	5960	2	Espermidina	1102	2	53	0	53
Ac. Aspartico	5960	2	Espermidina	1102	50	69	0	69
Ac. Aspartico	5960	2	Espermidina	1102	132	63	2	65
Ac. Aspartico	5960	2	Espermidina	1102	140	66	0	66
Ac. Aspartico	5960	2	Espermidina	1102	187	70	1	71
Ac. Aspartico	5960	2	Espermidina	1102	279	71	1	72
Ac. Aspartico	5960	2	Espermidina	1102	322	74	8	82
Ac. Aspartico	5960	2	Espermidina	1102	331	70	0	70
Ac. Aspartico	5960	2	Espermidina	1102	332	77	0	77
Ac. Aspartico	5960	3	Espermidina	1102	1	59	1	60
Ac. Aspartico	5960	3	Espermidina	1102	2	63	0	63
Ac. Aspartico	5960	3	Espermidina	1102	50	71	1	72
Ac. Aspartico	5960	3	Espermidina	1102	132	71	0	71
Ac. Aspartico	5960	3	Espermidina	1102	140	65	0	65
Ac. Aspartico	5960	3	Espermidina	1102	187	65	0	65
Ac. Aspartico	5960	3	Espermidina	1102	279	65	5	70
Ac. Aspartico	5960	3	Espermidina	1102	322	69	0	69
Ac. Aspartico	5960	3	Espermidina	1102	331	82	0	82
Ac. Aspartico	5960	3	Espermidina	1102	332	70	1	71
Ac. Aspartico	5960	4	Espermidina	1102	1	50	0	50
Ac. Aspartico	5960	4	Espermidina	1102	2	50	0	50
Ac. Aspartico	5960	4	Espermidina	1102	50	65	0	65
Ac. Aspartico	5960	4	Espermidina	1102	132	60	2	62
Ac. Aspartico	5960	4	Espermidina	1102	140	62	1	63
Ac. Aspartico	5960	4	Espermidina	1102	187	73	0	73
Ac. Aspartico	5960	4	Espermidina	1102	279	74	2	76
Ac. Aspartico	5960	4	Espermidina	1102	322	79	7	86
Ac. Aspartico	5960	4	Espermidina	1102	331	70	0	70
Ac. Aspartico	5960	4	Espermidina	1102	332	73	0	73
Ac. Aspartico	5960	5	Espermidina	1102	1	47	1	48
Ac. Aspartico	5960	5	Espermidina	1102	2	47	1	48
Ac. Aspartico	5960	5	Espermidina	1102	50	62	0	62
Ac. Aspartico	5960	5	Espermidina	1102	132	57	0	57
Ac. Aspartico	5960	5	Espermidina	1102	140	59	1	60
Ac. Aspartico	5960	5	Espermidina	1102	187	64	1	65
Ac. Aspartico	5960	5	Espermidina	1102	279	69	0	69
Ac. Aspartico	5960	5	Espermidina	1102	322	75	0	75
Ac. Aspartico	5960	5	Espermidina	1102	331	70	4	74
Ac. Aspartico	5960	5	Espermidina	1102	332	72	0	72
Ac. Aspartico	5960	7	Espermidina	1102	1	62	0	62
Ac. Aspartico	5960	7	Espermidina	1102	2	62	0	62
Ac. Aspartico	5960	7	Espermidina	1102	50	69	1	70
Ac. Aspartico	5960	7	Espermidina	1102	132	68	5	73
Ac. Aspartico	5960	7	Espermidina	1102	140	69	0	69
Ac. Aspartico	5960	7	Espermidina	1102	187	73	10	83
Ac. Aspartico	5960	7	Espermidina	1102	279	72	0	72
Ac. Aspartico	5960	7	Espermidina	1102	322	74	1	75
Ac. Aspartico	5960	7	Espermidina	1102	331	79	5	84
Ac. Aspartico	5960	7	Espermidina	1102	332	73	12	85
Ac. Aspartico	5960	8	Espermidina	1102	1	60	3	63
Ac. Aspartico	5960	8	Espermidina	1102	2	61	2	63
Ac. Aspartico	5960	8	Espermidina	1102	50	72	1	73
Ac. Aspartico	5960	8	Espermidina	1102	132	70	0	70
Ac. Aspartico	5960	8	Espermidina	1102	140	65	1	66
Ac. Aspartico	5960	8	Espermidina	1102	187	69	0	69
Ac. Aspartico	5960	8	Espermidina	1102	279	68	0	68
Ac. Aspartico	5960	8	Espermidina	1102	322	69	0	69
Ac. Aspartico	5960	8	Espermidina	1102	331	77	0	77
Ac. Aspartico	5960	8	Espermidina	1102	332	65	0	65
Ac. Aspartico	5960	9	Espermidina	1102	1	59	1	60
Ac. Aspartico	5960	9	Espermidina	1102	2	59	1	60
Ac. Aspartico	5960	9	Espermidina	1102	50	73	0	73
Ac. Aspartico	5960	9	Espermidina	1102	132	71	0	71
Ac. Aspartico	5960	9	Espermidina	1102	140	71	7	78
Ac. Aspartico	5960	9	Espermidina	1102	187	65	0	65
Ac. Aspartico	5960	9	Espermidina	1102	279	65	4	69
Ac. Aspartico	5960	9	Espermidina	1102	322	68	0	68
Ac. Aspartico	5960	9	Espermidina	1102	331	77	1	78
Ac. Aspartico	5960	9	Espermidina	1102	332	68	0	68
Ac. Aspartico	5960	11	Espermidina	1102	1	56	0	56
Ac. Aspartico	5960	11	Espermidina	1102	2	56	0	56
Ac. Aspartico	5960	11	Espermidina	1102	50	64	0	64
Ac. Aspartico	5960	11	Espermidina	1102	132	63	4	67
Ac. Aspartico	5960	11	Espermidina	1102	140	60	0	60
Ac. Aspartico	5960	11	Espermidina	1102	187	73	0	73
Ac. Aspartico	5960	11	Espermidina	1102	279	71	2	73
Ac. Aspartico	5960	11	Espermidina	1102	322	75	11	86
Ac. Aspartico	5960	11	Espermidina	1102	331	73	0	73
Ac. Aspartico	5960	11	Espermidina	1102	332	73	0	73
Ac. Aspartico	5960	12	Espermidina	1102	1	58	0	58
Ac. Aspartico	5960	12	Espermidina	1102	2	58	0	58
Ac. Aspartico	5960	12	Espermidina	1102	50	65	0	65
Ac. Aspartico	5960	12	Espermidina	1102	132	61	2	63
Ac. Aspartico	5960	12	Espermidina	1102	140	64	2	66
Ac. Aspartico	5960	12	Espermidina	1102	187	71	0	71
Ac. Aspartico	5960	12	Espermidina	1102	279	71	2	73
Ac. Aspartico	5960	12	Espermidina	1102	322	72	1	73
Ac. Aspartico	5960	12	Espermidina	1102	331	74	0	74
Ac. Aspartico	5960	12	Espermidina	1102	332	67	0	67
Ac. Aspartico	5960	1	Espermina	1103	1	36	0	36
Ac. Aspartico	5960	1	Espermina	1103	4	49	0	49
Ac. Aspartico	5960	1	Espermina	1103	11	47	0	47
Ac. Aspartico	5960	1	Espermina	1103	16	45	0	45
Ac. Aspartico	5960	1	Espermina	1103	24	44	0	44
Ac. Aspartico	5960	1	Espermina	1103	37	41	1	42
Ac. Aspartico	5960	1	Espermina	1103	42	49	7	56
Ac. Aspartico	5960	1	Espermina	1103	43	44	0	44
Ac. Aspartico	5960	1	Espermina	1103	45	47	5	52
Ac. Aspartico	5960	1	Espermina	1103	49	45	1	46
Ac. Aspartico	5960	2	Espermina	1103	1	39	0	39
Ac. Aspartico	5960	2	Espermina	1103	4	45	9	54
Ac. Aspartico	5960	2	Espermina	1103	11	48	0	48
Ac. Aspartico	5960	2	Espermina	1103	16	47	0	47
Ac. Aspartico	5960	2	Espermina	1103	24	42	11	53
Ac. Aspartico	5960	2	Espermina	1103	37	46	0	46
Ac. Aspartico	5960	2	Espermina	1103	42	47	10	57
Ac. Aspartico	5960	2	Espermina	1103	43	40	0	40
Ac. Aspartico	5960	2	Espermina	1103	45	48	4	52
Ac. Aspartico	5960	2	Espermina	1103	49	47	0	47
Ac. Aspartico	5960	3	Espermina	1103	1	44	0	44
Ac. Aspartico	5960	3	Espermina	1103	4	53	0	53
Ac. Aspartico	5960	3	Espermina	1103	11	52	0	52
Ac. Aspartico	5960	3	Espermina	1103	16	52	0	52
Ac. Aspartico	5960	3	Espermina	1103	24	52	0	52
Ac. Aspartico	5960	3	Espermina	1103	37	53	0	53
Ac. Aspartico	5960	3	Espermina	1103	42	51	0	51
Ac. Aspartico	5960	3	Espermina	1103	43	44	0	44
Ac. Aspartico	5960	3	Espermina	1103	45	58	1	59
Ac. Aspartico	5960	3	Espermina	1103	49	52	0	52
Ac. Aspartico	5960	4	Espermina	1103	1	38	0	38
Ac. Aspartico	5960	4	Espermina	1103	4	46	6	52
Ac. Aspartico	5960	4	Espermina	1103	11	46	0	46
Ac. Aspartico	5960	4	Espermina	1103	16	46	0	46
Ac. Aspartico	5960	4	Espermina	1103	24	42	9	51
Ac. Aspartico	5960	4	Espermina	1103	37	43	0	43
Ac. Aspartico	5960	4	Espermina	1103	42	49	9	58
Ac. Aspartico	5960	4	Espermina	1103	43	37	0	37
Ac. Aspartico	5960	4	Espermina	1103	45	50	9	59
Ac. Aspartico	5960	4	Espermina	1103	49	49	1	50
Ac. Aspartico	5960	5	Espermina	1103	1	36	0	36
Ac. Aspartico	5960	5	Espermina	1103	4	50	0	50
Ac. Aspartico	5960	5	Espermina	1103	11	46	0	46
Ac. Aspartico	5960	5	Espermina	1103	16	39	0	39
Ac. Aspartico	5960	5	Espermina	1103	24	41	0	41
Ac. Aspartico	5960	5	Espermina	1103	37	44	0	44
Ac. Aspartico	5960	5	Espermina	1103	42	49	2	51
Ac. Aspartico	5960	5	Espermina	1103	43	35	0	35
Ac. Aspartico	5960	5	Espermina	1103	45	49	0	49
Ac. Aspartico	5960	5	Espermina	1103	49	51	0	51
Ac. Aspartico	5960	7	Espermina	1103	1	46	0	46
Ac. Aspartico	5960	7	Espermina	1103	4	52	0	52
Ac. Aspartico	5960	7	Espermina	1103	11	53	0	53
Ac. Aspartico	5960	7	Espermina	1103	16	52	0	52
Ac. Aspartico	5960	7	Espermina	1103	24	47	0	47
Ac. Aspartico	5960	7	Espermina	1103	37	51	0	51
Ac. Aspartico	5960	7	Espermina	1103	42	53	0	53
Ac. Aspartico	5960	7	Espermina	1103	43	45	0	45
Ac. Aspartico	5960	7	Espermina	1103	45	50	0	50
Ac. Aspartico	5960	7	Espermina	1103	49	50	0	50
Ac. Aspartico	5960	8	Espermina	1103	1	45	0	45
Ac. Aspartico	5960	8	Espermina	1103	4	51	0	51
Ac. Aspartico	5960	8	Espermina	1103	11	48	0	48
Ac. Aspartico	5960	8	Espermina	1103	16	45	0	45
Ac. Aspartico	5960	8	Espermina	1103	24	49	0	49
Ac. Aspartico	5960	8	Espermina	1103	37	50	0	50
Ac. Aspartico	5960	8	Espermina	1103	42	59	2	61
Ac. Aspartico	5960	8	Espermina	1103	43	45	0	45
Ac. Aspartico	5960	8	Espermina	1103	45	56	0	56
Ac. Aspartico	5960	8	Espermina	1103	49	57	0	57
Ac. Aspartico	5960	9	Espermina	1103	1	44	0	44
Ac. Aspartico	5960	9	Espermina	1103	4	53	0	53
Ac. Aspartico	5960	9	Espermina	1103	11	51	0	51
Ac. Aspartico	5960	9	Espermina	1103	16	50	0	50
Ac. Aspartico	5960	9	Espermina	1103	24	51	0	51
Ac. Aspartico	5960	9	Espermina	1103	37	53	1	54
Ac. Aspartico	5960	9	Espermina	1103	42	56	0	56
Ac. Aspartico	5960	9	Espermina	1103	43	52	0	52
Ac. Aspartico	5960	9	Espermina	1103	45	54	3	57
Ac. Aspartico	5960	9	Espermina	1103	49	52	5	57
Ac. Aspartico	5960	11	Espermina	1103	1	42	0	42
Ac. Aspartico	5960	11	Espermina	1103	4	47	4	51
Ac. Aspartico	5960	11	Espermina	1103	11	48	0	48
Ac. Aspartico	5960	11	Espermina	1103	16	48	0	48
Ac. Aspartico	5960	11	Espermina	1103	24	45	1	46
Ac. Aspartico	5960	11	Espermina	1103	37	46	0	46
Ac. Aspartico	5960	11	Espermina	1103	42	49	0	49
Ac. Aspartico	5960	11	Espermina	1103	43	42	0	42
Ac. Aspartico	5960	11	Espermina	1103	45	52	7	59
Ac. Aspartico	5960	11	Espermina	1103	49	53	0	53
Ac. Aspartico	5960	12	Espermina	1103	1	43	0	43
Ac. Aspartico	5960	12	Espermina	1103	4	45	0	45
Ac. Aspartico	5960	12	Espermina	1103	11	47	0	47
Ac. Aspartico	5960	12	Espermina	1103	16	47	0	47
Ac. Aspartico	5960	12	Espermina	1103	24	44	0	44
Ac. Aspartico	5960	12	Espermina	1103	37	47	0	47
Ac. Aspartico	5960	12	Espermina	1103	42	47	0	47
Ac. Aspartico	5960	12	Espermina	1103	43	43	0	43
Ac. Aspartico	5960	12	Espermina	1103	45	48	2	50
Ac. Aspartico	5960	12	Espermina	1103	49	46	0	46
Ac. Aspartico	5960	1	Fenformina	8249	1	51	0	51
Ac. Aspartico	5960	1	Fenformina	8249	4	51	0	51
Ac. Aspartico	5960	1	Fenformina	8249	5	56	0	56
Ac. Aspartico	5960	1	Fenformina	8249	7	43	0	43
Ac. Aspartico	5960	1	Fenformina	8249	31	59	5	64
Ac. Aspartico	5960	1	Fenformina	8249	33	67	0	67
Ac. Aspartico	5960	1	Fenformina	8249	36	63	0	63
Ac. Aspartico	5960	1	Fenformina	8249	41	49	0	49
Ac. Aspartico	5960	1	Fenformina	8249	49	63	0	63
Ac. Aspartico	5960	1	Fenformina	8249	53	41	0	41
Ac. Aspartico	5960	2	Fenformina	8249	1	50	0	50
Ac. Aspartico	5960	2	Fenformina	8249	4	51	0	51
Ac. Aspartico	5960	2	Fenformina	8249	5	49	0	49
Ac. Aspartico	5960	2	Fenformina	8249	7	51	0	51
Ac. Aspartico	5960	2	Fenformina	8249	31	63	0	63
Ac. Aspartico	5960	2	Fenformina	8249	33	62	0	62
Ac. Aspartico	5960	2	Fenformina	8249	36	56	0	56
Ac. Aspartico	5960	2	Fenformina	8249	41	51	0	51
Ac. Aspartico	5960	2	Fenformina	8249	49	60	0	60
Ac. Aspartico	5960	2	Fenformina	8249	53	46	0	46
Ac. Aspartico	5960	3	Fenformina	8249	1	60	0	60
Ac. Aspartico	5960	3	Fenformina	8249	4	53	0	53
Ac. Aspartico	5960	3	Fenformina	8249	5	62	0	62
Ac. Aspartico	5960	3	Fenformina	8249	7	56	0	56
Ac. Aspartico	5960	3	Fenformina	8249	31	60	6	66
Ac. Aspartico	5960	3	Fenformina	8249	33	58	5	63
Ac. Aspartico	5960	3	Fenformina	8249	36	62	0	62
Ac. Aspartico	5960	3	Fenformina	8249	41	50	0	50
Ac. Aspartico	5960	3	Fenformina	8249	49	66	1	67
Ac. Aspartico	5960	3	Fenformina	8249	53	53	0	53
Ac. Aspartico	5960	4	Fenformina	8249	1	53	0	53
Ac. Aspartico	5960	4	Fenformina	8249	4	47	0	47
Ac. Aspartico	5960	4	Fenformina	8249	5	52	0	52
Ac. Aspartico	5960	4	Fenformina	8249	7	50	0	50
Ac. Aspartico	5960	4	Fenformina	8249	31	61	2	63
Ac. Aspartico	5960	4	Fenformina	8249	33	69	0	69
Ac. Aspartico	5960	4	Fenformina	8249	36	63	0	63
Ac. Aspartico	5960	4	Fenformina	8249	41	42	0	42
Ac. Aspartico	5960	4	Fenformina	8249	49	62	0	62
Ac. Aspartico	5960	4	Fenformina	8249	53	42	0	42
Ac. Aspartico	5960	5	Fenformina	8249	1	50	2	52
Ac. Aspartico	5960	5	Fenformina	8249	4	46	0	46
Ac. Aspartico	5960	5	Fenformina	8249	5	53	0	53
Ac. Aspartico	5960	5	Fenformina	8249	7	47	0	47
Ac. Aspartico	5960	5	Fenformina	8249	31	55	0	55
Ac. Aspartico	5960	5	Fenformina	8249	33	59	0	59
Ac. Aspartico	5960	5	Fenformina	8249	36	64	0	64
Ac. Aspartico	5960	5	Fenformina	8249	41	40	0	40
Ac. Aspartico	5960	5	Fenformina	8249	49	64	0	64
Ac. Aspartico	5960	5	Fenformina	8249	53	42	0	42
Ac. Aspartico	5960	7	Fenformina	8249	1	58	0	58
Ac. Aspartico	5960	7	Fenformina	8249	4	54	0	54
Ac. Aspartico	5960	7	Fenformina	8249	5	56	0	56
Ac. Aspartico	5960	7	Fenformina	8249	7	58	0	58
Ac. Aspartico	5960	7	Fenformina	8249	31	63	0	63
Ac. Aspartico	5960	7	Fenformina	8249	33	64	0	64
Ac. Aspartico	5960	7	Fenformina	8249	36	56	0	56
Ac. Aspartico	5960	7	Fenformina	8249	41	54	0	54
Ac. Aspartico	5960	7	Fenformina	8249	49	60	5	65
Ac. Aspartico	5960	7	Fenformina	8249	53	57	0	57
Ac. Aspartico	5960	8	Fenformina	8249	1	63	0	63
Ac. Aspartico	5960	8	Fenformina	8249	4	53	0	53
Ac. Aspartico	5960	8	Fenformina	8249	5	62	0	62
Ac. Aspartico	5960	8	Fenformina	8249	7	60	0	60
Ac. Aspartico	5960	8	Fenformina	8249	31	58	2	60
Ac. Aspartico	5960	8	Fenformina	8249	33	58	0	58
Ac. Aspartico	5960	8	Fenformina	8249	36	65	0	65
Ac. Aspartico	5960	8	Fenformina	8249	41	53	0	53
Ac. Aspartico	5960	8	Fenformina	8249	49	65	1	66
Ac. Aspartico	5960	8	Fenformina	8249	53	55	0	55
Ac. Aspartico	5960	9	Fenformina	8249	1	61	0	61
Ac. Aspartico	5960	9	Fenformina	8249	4	56	0	56
Ac. Aspartico	5960	9	Fenformina	8249	5	61	0	61
Ac. Aspartico	5960	9	Fenformina	8249	7	56	0	56
Ac. Aspartico	5960	9	Fenformina	8249	31	57	3	60
Ac. Aspartico	5960	9	Fenformina	8249	33	58	0	58
Ac. Aspartico	5960	9	Fenformina	8249	36	64	0	64
Ac. Aspartico	5960	9	Fenformina	8249	41	49	0	49
Ac. Aspartico	5960	9	Fenformina	8249	49	66	0	66
Ac. Aspartico	5960	9	Fenformina	8249	53	51	0	51
Ac. Aspartico	5960	11	Fenformina	8249	1	56	0	56
Ac. Aspartico	5960	11	Fenformina	8249	4	48	0	48
Ac. Aspartico	5960	11	Fenformina	8249	5	55	0	55
Ac. Aspartico	5960	11	Fenformina	8249	7	54	0	54
Ac. Aspartico	5960	11	Fenformina	8249	31	65	2	67
Ac. Aspartico	5960	11	Fenformina	8249	33	65	0	65
Ac. Aspartico	5960	11	Fenformina	8249	36	66	0	66
Ac. Aspartico	5960	11	Fenformina	8249	41	47	0	47
Ac. Aspartico	5960	11	Fenformina	8249	49	65	0	65
Ac. Aspartico	5960	11	Fenformina	8249	53	53	0	53
Ac. Aspartico	5960	12	Fenformina	8249	1	50	0	50
Ac. Aspartico	5960	12	Fenformina	8249	4	46	0	46
Ac. Aspartico	5960	12	Fenformina	8249	5	49	0	49
Ac. Aspartico	5960	12	Fenformina	8249	7	50	7	57
Ac. Aspartico	5960	12	Fenformina	8249	31	59	7	66
Ac. Aspartico	5960	12	Fenformina	8249	33	61	0	61
Ac. Aspartico	5960	12	Fenformina	8249	36	59	6	65
Ac. Aspartico	5960	12	Fenformina	8249	41	47	0	47
Ac. Aspartico	5960	12	Fenformina	8249	49	55	0	55
Ac. Aspartico	5960	12	Fenformina	8249	53	48	0	48
Ac. Aspartico	5960	1	Ac. Guanidinoacet.	763	1	77	5	82
Ac. Aspartico	5960	1	Ac. Guanidinoacet.	763	2	76	17	93
Ac. Aspartico	5960	1	Ac. Guanidinoacet.	763	3	79	5	84
Ac. Aspartico	5960	1	Ac. Guanidinoacet.	763	4	85	14	99
Ac. Aspartico	5960	1	Ac. Guanidinoacet.	763	5	85	26	111
Ac. Aspartico	5960	1	Ac. Guanidinoacet.	763	6	90	23	113
Ac. Aspartico	5960	1	Ac. Guanidinoacet.	763	7	79	13	92
Ac. Aspartico	5960	1	Ac. Guanidinoacet.	763	8	84	11	95
Ac. Aspartico	5960	1	Ac. Guanidinoacet.	763	9	83	22	105
Ac. Aspartico	5960	2	Ac. Guanidinoacet.	763	1	79	7	86
Ac. Aspartico	5960	2	Ac. Guanidinoacet.	763	2	80	6	86
Ac. Aspartico	5960	2	Ac. Guanidinoacet.	763	3	82	8	90
Ac. Aspartico	5960	2	Ac. Guanidinoacet.	763	4	82	15	97
Ac. Aspartico	5960	2	Ac. Guanidinoacet.	763	5	92	25	117
Ac. Aspartico	5960	2	Ac. Guanidinoacet.	763	6	83	24	107
Ac. Aspartico	5960	2	Ac. Guanidinoacet.	763	7	88	18	106
Ac. Aspartico	5960	2	Ac. Guanidinoacet.	763	8	81	14	95
Ac. Aspartico	5960	2	Ac. Guanidinoacet.	763	9	86	13	99
Ac. Aspartico	5960	3	Ac. Guanidinoacet.	763	1	84	9	93
Ac. Aspartico	5960	3	Ac. Guanidinoacet.	763	2	89	19	108
Ac. Aspartico	5960	3	Ac. Guanidinoacet.	763	3	92	21	113
Ac. Aspartico	5960	3	Ac. Guanidinoacet.	763	4	83	21	104
Ac. Aspartico	5960	3	Ac. Guanidinoacet.	763	5	84	18	102
Ac. Aspartico	5960	3	Ac. Guanidinoacet.	763	6	80	16	96
Ac. Aspartico	5960	3	Ac. Guanidinoacet.	763	7	82	21	103
Ac. Aspartico	5960	3	Ac. Guanidinoacet.	763	8	84	24	108
Ac. Aspartico	5960	3	Ac. Guanidinoacet.	763	9	82	14	96
Ac. Aspartico	5960	4	Ac. Guanidinoacet.	763	1	81	6	87
Ac. Aspartico	5960	4	Ac. Guanidinoacet.	763	2	79	21	100
Ac. Aspartico	5960	4	Ac. Guanidinoacet.	763	3	79	19	98
Ac. Aspartico	5960	4	Ac. Guanidinoacet.	763	4	87	23	110
Ac. Aspartico	5960	4	Ac. Guanidinoacet.	763	5	79	17	96
Ac. Aspartico	5960	4	Ac. Guanidinoacet.	763	6	82	10	92
Ac. Aspartico	5960	4	Ac. Guanidinoacet.	763	7	85	23	108
Ac. Aspartico	5960	4	Ac. Guanidinoacet.	763	8	87	21	108
Ac. Aspartico	5960	4	Ac. Guanidinoacet.	763	9	89	25	114
Ac. Aspartico	5960	5	Ac. Guanidinoacet.	763	1	74	10	84
Ac. Aspartico	5960	5	Ac. Guanidinoacet.	763	2	75	9	84
Ac. Aspartico	5960	5	Ac. Guanidinoacet.	763	3	73	10	83
Ac. Aspartico	5960	5	Ac. Guanidinoacet.	763	4	84	20	104
Ac. Aspartico	5960	5	Ac. Guanidinoacet.	763	5	88	19	107
Ac. Aspartico	5960	5	Ac. Guanidinoacet.	763	6	84	8	92
Ac. Aspartico	5960	5	Ac. Guanidinoacet.	763	7	74	9	83
Ac. Aspartico	5960	5	Ac. Guanidinoacet.	763	8	80	7	87
Ac. Aspartico	5960	5	Ac. Guanidinoacet.	763	9	76	6	82
Ac. Aspartico	5960	7	Ac. Guanidinoacet.	763	1	94	26	120
Ac. Aspartico	5960	7	Ac. Guanidinoacet.	763	2	89	15	104
Ac. Aspartico	5960	7	Ac. Guanidinoacet.	763	3	91	22	113
Ac. Aspartico	5960	7	Ac. Guanidinoacet.	763	4	84	25	109
Ac. Aspartico	5960	7	Ac. Guanidinoacet.	763	5	88	13	101
Ac. Aspartico	5960	7	Ac. Guanidinoacet.	763	6	79	18	97
Ac. Aspartico	5960	7	Ac. Guanidinoacet.	763	7	88	16	104
Ac. Aspartico	5960	7	Ac. Guanidinoacet.	763	8	82	9	91
Ac. Aspartico	5960	7	Ac. Guanidinoacet.	763	9	88	9	97
Ac. Aspartico	5960	8	Ac. Guanidinoacet.	763	1	93	25	118
Ac. Aspartico	5960	8	Ac. Guanidinoacet.	763	2	88	17	105
Ac. Aspartico	5960	8	Ac. Guanidinoacet.	763	3	89	21	110
Ac. Aspartico	5960	8	Ac. Guanidinoacet.	763	4	87	23	110
Ac. Aspartico	5960	8	Ac. Guanidinoacet.	763	5	81	17	98
Ac. Aspartico	5960	8	Ac. Guanidinoacet.	763	6	83	18	101
Ac. Aspartico	5960	8	Ac. Guanidinoacet.	763	7	83	7	90
Ac. Aspartico	5960	8	Ac. Guanidinoacet.	763	8	82	7	89
Ac. Aspartico	5960	8	Ac. Guanidinoacet.	763	9	85	6	91
Ac. Aspartico	5960	9	Ac. Guanidinoacet.	763	1	86	9	95
Ac. Aspartico	5960	9	Ac. Guanidinoacet.	763	2	89	22	111
Ac. Aspartico	5960	9	Ac. Guanidinoacet.	763	3	90	21	111
Ac. Aspartico	5960	9	Ac. Guanidinoacet.	763	4	84	11	95
Ac. Aspartico	5960	9	Ac. Guanidinoacet.	763	5	87	11	98
Ac. Aspartico	5960	9	Ac. Guanidinoacet.	763	6	86	34	120
Ac. Aspartico	5960	9	Ac. Guanidinoacet.	763	7	81	26	107
Ac. Aspartico	5960	9	Ac. Guanidinoacet.	763	8	82	21	103
Ac. Aspartico	5960	9	Ac. Guanidinoacet.	763	9	82	20	102
Ac. Aspartico	5960	11	Ac. Guanidinoacet.	763	1	84	7	91
Ac. Aspartico	5960	11	Ac. Guanidinoacet.	763	2	82	7	89
Ac. Aspartico	5960	11	Ac. Guanidinoacet.	763	3	79	8	87
Ac. Aspartico	5960	11	Ac. Guanidinoacet.	763	4	83	27	110
Ac. Aspartico	5960	11	Ac. Guanidinoacet.	763	5	82	10	92
Ac. Aspartico	5960	11	Ac. Guanidinoacet.	763	6	81	12	93
Ac. Aspartico	5960	11	Ac. Guanidinoacet.	763	7	87	20	107
Ac. Aspartico	5960	11	Ac. Guanidinoacet.	763	8	84	22	106
Ac. Aspartico	5960	11	Ac. Guanidinoacet.	763	9	88	24	112
Ac. Aspartico	5960	12	Ac. Guanidinoacet.	763	1	82	18	100
Ac. Aspartico	5960	12	Ac. Guanidinoacet.	763	2	81	14	95
Ac. Aspartico	5960	12	Ac. Guanidinoacet.	763	3	78	9	87
Ac. Aspartico	5960	12	Ac. Guanidinoacet.	763	4	85	9	94
Ac. Aspartico	5960	12	Ac. Guanidinoacet.	763	5	86	9	95
Ac. Aspartico	5960	12	Ac. Guanidinoacet.	763	6	86	11	97
Ac. Aspartico	5960	12	Ac. Guanidinoacet.	763	7	83	7	90
Ac. Aspartico	5960	12	Ac. Guanidinoacet.	763	8	91	22	113
Ac. Aspartico	5960	12	Ac. Guanidinoacet.	763	9	84	23	107
Ac. Aspartico	5960	1	Ornitina	6262	1	86	40	126
Ac. Aspartico	5960	1	Ornitina	6262	4	74	13	87
Ac. Aspartico	5960	1	Ornitina	6262	7	70	19	89
Ac. Aspartico	5960	1	Ornitina	6262	27	73	4	77
Ac. Aspartico	5960	1	Ornitina	6262	28	77	0	77
Ac. Aspartico	5960	1	Ornitina	6262	29	71	9	80
Ac. Aspartico	5960	1	Ornitina	6262	30	84	14	98
Ac. Aspartico	5960	1	Ornitina	6262	35	83	14	97
Ac. Aspartico	5960	1	Ornitina	6262	37	84	18	102
Ac. Aspartico	5960	1	Ornitina	6262	38	87	29	116
Ac. Aspartico	5960	2	Ornitina	6262	1	80	24	104
Ac. Aspartico	5960	2	Ornitina	6262	4	71	14	85
Ac. Aspartico	5960	2	Ornitina	6262	7	70	18	88
Ac. Aspartico	5960	2	Ornitina	6262	27	74	0	74
Ac. Aspartico	5960	2	Ornitina	6262	28	79	20	99
Ac. Aspartico	5960	2	Ornitina	6262	29	78	15	93
Ac. Aspartico	5960	2	Ornitina	6262	30	87	24	111
Ac. Aspartico	5960	2	Ornitina	6262	35	82	9	91
Ac. Aspartico	5960	2	Ornitina	6262	37	82	17	99
Ac. Aspartico	5960	2	Ornitina	6262	38	82	18	100
Ac. Aspartico	5960	3	Ornitina	6262	1	75	3	78
Ac. Aspartico	5960	3	Ornitina	6262	4	84	18	102
Ac. Aspartico	5960	3	Ornitina	6262	7	78	26	104
Ac. Aspartico	5960	3	Ornitina	6262	27	73	1	74
Ac. Aspartico	5960	3	Ornitina	6262	28	75	1	76
Ac. Aspartico	5960	3	Ornitina	6262	29	85	21	106
Ac. Aspartico	5960	3	Ornitina	6262	30	77	7	84
Ac. Aspartico	5960	3	Ornitina	6262	35	86	27	113
Ac. Aspartico	5960	3	Ornitina	6262	37	77	12	89
Ac. Aspartico	5960	3	Ornitina	6262	38	73	0	73
Ac. Aspartico	5960	4	Ornitina	6262	1	83	33	116
Ac. Aspartico	5960	4	Ornitina	6262	4	76	19	95
Ac. Aspartico	5960	4	Ornitina	6262	7	66	5	71
Ac. Aspartico	5960	4	Ornitina	6262	27	70	0	70
Ac. Aspartico	5960	4	Ornitina	6262	28	76	0	76
Ac. Aspartico	5960	4	Ornitina	6262	29	76	20	96
Ac. Aspartico	5960	4	Ornitina	6262	30	80	7	87
Ac. Aspartico	5960	4	Ornitina	6262	35	80	6	86
Ac. Aspartico	5960	4	Ornitina	6262	37	77	1	78
Ac. Aspartico	5960	4	Ornitina	6262	38	88	36	124
Ac. Aspartico	5960	5	Ornitina	6262	1	76	15	91
Ac. Aspartico	5960	5	Ornitina	6262	4	70	3	73
Ac. Aspartico	5960	5	Ornitina	6262	7	74	23	97
Ac. Aspartico	5960	5	Ornitina	6262	27	85	29	114
Ac. Aspartico	5960	5	Ornitina	6262	28	86	29	115
Ac. Aspartico	5960	5	Ornitina	6262	29	68	7	75
Ac. Aspartico	5960	5	Ornitina	6262	30	81	5	86
Ac. Aspartico	5960	5	Ornitina	6262	35	81	18	99
Ac. Aspartico	5960	5	Ornitina	6262	37	79	29	108
Ac. Aspartico	5960	5	Ornitina	6262	38	82	16	98
Ac. Aspartico	5960	7	Ornitina	6262	1	81	18	99
Ac. Aspartico	5960	7	Ornitina	6262	4	80	27	107
Ac. Aspartico	5960	7	Ornitina	6262	7	80	26	106
Ac. Aspartico	5960	7	Ornitina	6262	27	74	3	77
Ac. Aspartico	5960	7	Ornitina	6262	28	71	0	71
Ac. Aspartico	5960	7	Ornitina	6262	29	87	28	115
Ac. Aspartico	5960	7	Ornitina	6262	30	82	24	106
Ac. Aspartico	5960	7	Ornitina	6262	35	87	15	102
Ac. Aspartico	5960	7	Ornitina	6262	37	74	4	78
Ac. Aspartico	5960	7	Ornitina	6262	38	70	18	88
Ac. Aspartico	5960	8	Ornitina	6262	1	74	5	79
Ac. Aspartico	5960	8	Ornitina	6262	4	79	5	84
Ac. Aspartico	5960	8	Ornitina	6262	7	80	20	100
Ac. Aspartico	5960	8	Ornitina	6262	27	80	5	85
Ac. Aspartico	5960	8	Ornitina	6262	28	74	3	77
Ac. Aspartico	5960	8	Ornitina	6262	29	85	17	102
Ac. Aspartico	5960	8	Ornitina	6262	30	74	7	81
Ac. Aspartico	5960	8	Ornitina	6262	35	85	23	108
Ac. Aspartico	5960	8	Ornitina	6262	37	80	20	100
Ac. Aspartico	5960	8	Ornitina	6262	38	70	0	70
Ac. Aspartico	5960	9	Ornitina	6262	1	81	4	85
Ac. Aspartico	5960	9	Ornitina	6262	4	81	15	96
Ac. Aspartico	5960	9	Ornitina	6262	7	79	19	98
Ac. Aspartico	5960	9	Ornitina	6262	27	78	3	81
Ac. Aspartico	5960	9	Ornitina	6262	28	73	0	73
Ac. Aspartico	5960	9	Ornitina	6262	29	83	14	97
Ac. Aspartico	5960	9	Ornitina	6262	30	80	7	87
Ac. Aspartico	5960	9	Ornitina	6262	35	91	33	124
Ac. Aspartico	5960	9	Ornitina	6262	37	83	7	90
Ac. Aspartico	5960	9	Ornitina	6262	38	75	0	75
Ac. Aspartico	5960	11	Ornitina	6262	1	76	22	98
Ac. Aspartico	5960	11	Ornitina	6262	4	78	23	101
Ac. Aspartico	5960	11	Ornitina	6262	7	74	7	81
Ac. Aspartico	5960	11	Ornitina	6262	27	78	0	78
Ac. Aspartico	5960	11	Ornitina	6262	28	82	14	96
Ac. Aspartico	5960	11	Ornitina	6262	29	83	18	101
Ac. Aspartico	5960	11	Ornitina	6262	30	79	27	106
Ac. Aspartico	5960	11	Ornitina	6262	35	80	9	89
Ac. Aspartico	5960	11	Ornitina	6262	37	78	7	85
Ac. Aspartico	5960	11	Ornitina	6262	38	82	25	107
Ac. Aspartico	5960	12	Ornitina	6262	1	76	11	87
Ac. Aspartico	5960	12	Ornitina	6262	4	83	25	108
Ac. Aspartico	5960	12	Ornitina	6262	7	74	5	79
Ac. Aspartico	5960	12	Ornitina	6262	27	88	0	88
Ac. Aspartico	5960	12	Ornitina	6262	28	90	0	90
Ac. Aspartico	5960	12	Ornitina	6262	29	82	10	92
Ac. Aspartico	5960	12	Ornitina	6262	30	86	24	110
Ac. Aspartico	5960	12	Ornitina	6262	35	78	7	85
Ac. Aspartico	5960	12	Ornitina	6262	37	82	4	86
Ac. Aspartico	5960	12	Ornitina	6262	38	82	12	94
Ac. Aspartico	5960	1	Metformina	4091	1	82	0	82
Ac. Aspartico	5960	1	Metformina	4091	2	81	0	81
Ac. Aspartico	5960	1	Metformina	4091	3	80	2	82
Ac. Aspartico	5960	1	Metformina	4091	4	80	7	87
Ac. Aspartico	5960	1	Metformina	4091	5	75	12	87
Ac. Aspartico	5960	1	Metformina	4091	6	82	1	83
Ac. Aspartico	5960	1	Metformina	4091	7	85	2	87
Ac. Aspartico	5960	1	Metformina	4091	8	83	8	91
Ac. Aspartico	5960	2	Metformina	4091	1	88	0	88
Ac. Aspartico	5960	2	Metformina	4091	2	77	1	78
Ac. Aspartico	5960	2	Metformina	4091	3	81	5	86
Ac. Aspartico	5960	2	Metformina	4091	4	80	7	87
Ac. Aspartico	5960	2	Metformina	4091	5	84	1	85
Ac. Aspartico	5960	2	Metformina	4091	6	83	0	83
Ac. Aspartico	5960	2	Metformina	4091	7	85	4	89
Ac. Aspartico	5960	2	Metformina	4091	8	80	8	88
Ac. Aspartico	5960	3	Metformina	4091	1	80	0	80
Ac. Aspartico	5960	3	Metformina	4091	2	80	7	87
Ac. Aspartico	5960	3	Metformina	4091	3	85	0	85
Ac. Aspartico	5960	3	Metformina	4091	4	84	8	92
Ac. Aspartico	5960	3	Metformina	4091	5	82	1	83
Ac. Aspartico	5960	3	Metformina	4091	6	76	1	77
Ac. Aspartico	5960	3	Metformina	4091	7	87	0	87
Ac. Aspartico	5960	3	Metformina	4091	8	89	6	95
Ac. Aspartico	5960	4	Metformina	4091	1	84	2	86
Ac. Aspartico	5960	4	Metformina	4091	2	87	1	88
Ac. Aspartico	5960	4	Metformina	4091	3	82	2	84
Ac. Aspartico	5960	4	Metformina	4091	4	78	9	87
Ac. Aspartico	5960	4	Metformina	4091	5	75	4	79
Ac. Aspartico	5960	4	Metformina	4091	6	85	0	85
Ac. Aspartico	5960	4	Metformina	4091	7	80	0	80
Ac. Aspartico	5960	4	Metformina	4091	8	78	6	84
Ac. Aspartico	5960	5	Metformina	4091	1	85	0	85
Ac. Aspartico	5960	5	Metformina	4091	2	74	0	74
Ac. Aspartico	5960	5	Metformina	4091	3	77	0	77
Ac. Aspartico	5960	5	Metformina	4091	4	82	6	88
Ac. Aspartico	5960	5	Metformina	4091	5	86	4	90
Ac. Aspartico	5960	5	Metformina	4091	6	75	0	75
Ac. Aspartico	5960	5	Metformina	4091	7	76	0	76
Ac. Aspartico	5960	5	Metformina	4091	8	84	2	86
Ac. Aspartico	5960	7	Metformina	4091	1	84	6	90
Ac. Aspartico	5960	7	Metformina	4091	2	82	7	89
Ac. Aspartico	5960	7	Metformina	4091	3	84	1	85
Ac. Aspartico	5960	7	Metformina	4091	4	86	0	86
Ac. Aspartico	5960	7	Metformina	4091	5	79	8	87
Ac. Aspartico	5960	7	Metformina	4091	6	87	7	94
Ac. Aspartico	5960	7	Metformina	4091	7	87	8	95
Ac. Aspartico	5960	7	Metformina	4091	8	83	0	83
Ac. Aspartico	5960	8	Metformina	4091	1	80	0	80
Ac. Aspartico	5960	8	Metformina	4091	2	77	0	77
Ac. Aspartico	5960	8	Metformina	4091	3	86	0	86
Ac. Aspartico	5960	8	Metformina	4091	4	95	9	104
Ac. Aspartico	5960	8	Metformina	4091	5	81	10	91
Ac. Aspartico	5960	8	Metformina	4091	6	79	0	79
Ac. Aspartico	5960	8	Metformina	4091	7	81	0	81
Ac. Aspartico	5960	8	Metformina	4091	8	88	8	96
Ac. Aspartico	5960	9	Metformina	4091	1	77	0	77
Ac. Aspartico	5960	9	Metformina	4091	2	77	0	77
Ac. Aspartico	5960	9	Metformina	4091	3	82	0	82
Ac. Aspartico	5960	9	Metformina	4091	4	89	8	97
Ac. Aspartico	5960	9	Metformina	4091	5	80	6	86
Ac. Aspartico	5960	9	Metformina	4091	6	76	2	78
Ac. Aspartico	5960	9	Metformina	4091	7	89	0	89
Ac. Aspartico	5960	9	Metformina	4091	8	90	4	94
Ac. Aspartico	5960	11	Metformina	4091	1	80	1	81
Ac. Aspartico	5960	11	Metformina	4091	2	83	0	83
Ac. Aspartico	5960	11	Metformina	4091	3	87	4	91
Ac. Aspartico	5960	11	Metformina	4091	4	83	8	91
Ac. Aspartico	5960	11	Metformina	4091	5	79	6	85
Ac. Aspartico	5960	11	Metformina	4091	6	85	0	85
Ac. Aspartico	5960	11	Metformina	4091	7	82	2	84
Ac. Aspartico	5960	11	Metformina	4091	8	81	4	85
Ac. Aspartico	5960	12	Metformina	4091	1	88	7	95
Ac. Aspartico	5960	12	Metformina	4091	2	90	8	98
Ac. Aspartico	5960	12	Metformina	4091	3	88	3	91
Ac. Aspartico	5960	12	Metformina	4091	4	81	0	81
Ac. Aspartico	5960	12	Metformina	4091	5	77	0	77
Ac. Aspartico	5960	12	Metformina	4091	6	80	0	80
Ac. Aspartico	5960	12	Metformina	4091	7	83	3	86
Ac. Aspartico	5960	12	Metformina	4091	8	79	0	79
Ac. Aspartico	5960	1	Putrescina	1045	1	65	0	65
Ac. Aspartico	5960	1	Putrescina	1045	3	74	0	74
Ac. Aspartico	5960	1	Putrescina	1045	5	76	0	76
Ac. Aspartico	5960	1	Putrescina	1045	7	72	0	72
Ac. Aspartico	5960	1	Putrescina	1045	8	75	18	93
Ac. Aspartico	5960	1	Putrescina	1045	9	75	17	92
Ac. Aspartico	5960	1	Putrescina	1045	10	79	0	79
Ac. Aspartico	5960	1	Putrescina	1045	11	80	0	80
Ac. Aspartico	5960	1	Putrescina	1045	12	81	0	81
Ac. Aspartico	5960	1	Putrescina	1045	13	76	12	88
Ac. Aspartico	5960	2	Putrescina	1045	1	70	0	70
Ac. Aspartico	5960	2	Putrescina	1045	3	76	0	76
Ac. Aspartico	5960	2	Putrescina	1045	5	81	0	81
Ac. Aspartico	5960	2	Putrescina	1045	7	75	0	75
Ac. Aspartico	5960	2	Putrescina	1045	8	72	14	86
Ac. Aspartico	5960	2	Putrescina	1045	9	77	16	93
Ac. Aspartico	5960	2	Putrescina	1045	10	80	0	80
Ac. Aspartico	5960	2	Putrescina	1045	11	81	0	81
Ac. Aspartico	5960	2	Putrescina	1045	12	78	0	78
Ac. Aspartico	5960	2	Putrescina	1045	13	78	15	93
Ac. Aspartico	5960	3	Putrescina	1045	1	78	0	78
Ac. Aspartico	5960	3	Putrescina	1045	3	81	0	81
Ac. Aspartico	5960	3	Putrescina	1045	5	80	0	80
Ac. Aspartico	5960	3	Putrescina	1045	7	79	0	79
Ac. Aspartico	5960	3	Putrescina	1045	8	78	0	78
Ac. Aspartico	5960	3	Putrescina	1045	9	84	0	84
Ac. Aspartico	5960	3	Putrescina	1045	10	79	0	79
Ac. Aspartico	5960	3	Putrescina	1045	11	72	0	72
Ac. Aspartico	5960	3	Putrescina	1045	12	77	0	77
Ac. Aspartico	5960	3	Putrescina	1045	13	81	0	81
Ac. Aspartico	5960	4	Putrescina	1045	1	68	0	68
Ac. Aspartico	5960	4	Putrescina	1045	3	75	0	75
Ac. Aspartico	5960	4	Putrescina	1045	5	76	0	76
Ac. Aspartico	5960	4	Putrescina	1045	7	77	0	77
Ac. Aspartico	5960	4	Putrescina	1045	8	73	18	91
Ac. Aspartico	5960	4	Putrescina	1045	9	69	15	84
Ac. Aspartico	5960	4	Putrescina	1045	10	74	0	74
Ac. Aspartico	5960	4	Putrescina	1045	11	77	0	77
Ac. Aspartico	5960	4	Putrescina	1045	12	81	0	81
Ac. Aspartico	5960	4	Putrescina	1045	13	78	13	91
Ac. Aspartico	5960	5	Putrescina	1045	1	65	0	65
Ac. Aspartico	5960	5	Putrescina	1045	3	70	0	70
Ac. Aspartico	5960	5	Putrescina	1045	5	76	0	76
Ac. Aspartico	5960	5	Putrescina	1045	7	75	0	75
Ac. Aspartico	5960	5	Putrescina	1045	8	78	0	78
Ac. Aspartico	5960	5	Putrescina	1045	9	75	0	75
Ac. Aspartico	5960	5	Putrescina	1045	10	77	0	77
Ac. Aspartico	5960	5	Putrescina	1045	11	85	0	85
Ac. Aspartico	5960	5	Putrescina	1045	12	79	0	79
Ac. Aspartico	5960	5	Putrescina	1045	13	79	0	79
Ac. Aspartico	5960	7	Putrescina	1045	1	82	0	82
Ac. Aspartico	5960	7	Putrescina	1045	3	84	0	84
Ac. Aspartico	5960	7	Putrescina	1045	5	81	0	81
Ac. Aspartico	5960	7	Putrescina	1045	7	85	0	85
Ac. Aspartico	5960	7	Putrescina	1045	8	73	0	73
Ac. Aspartico	5960	7	Putrescina	1045	9	81	0	81
Ac. Aspartico	5960	7	Putrescina	1045	10	83	0	83
Ac. Aspartico	5960	7	Putrescina	1045	11	78	0	78
Ac. Aspartico	5960	7	Putrescina	1045	12	78	0	78
Ac. Aspartico	5960	7	Putrescina	1045	13	74	5	79
Ac. Aspartico	5960	8	Putrescina	1045	1	81	0	81
Ac. Aspartico	5960	8	Putrescina	1045	3	81	0	81
Ac. Aspartico	5960	8	Putrescina	1045	5	75	0	75
Ac. Aspartico	5960	8	Putrescina	1045	7	85	0	85
Ac. Aspartico	5960	8	Putrescina	1045	8	79	0	79
Ac. Aspartico	5960	8	Putrescina	1045	9	82	0	82
Ac. Aspartico	5960	8	Putrescina	1045	10	79	0	79
Ac. Aspartico	5960	8	Putrescina	1045	11	75	0	75
Ac. Aspartico	5960	8	Putrescina	1045	12	77	0	77
Ac. Aspartico	5960	8	Putrescina	1045	13	78	0	78
Ac. Aspartico	5960	9	Putrescina	1045	1	78	0	78
Ac. Aspartico	5960	9	Putrescina	1045	3	80	0	80
Ac. Aspartico	5960	9	Putrescina	1045	5	74	0	74
Ac. Aspartico	5960	9	Putrescina	1045	7	79	0	79
Ac. Aspartico	5960	9	Putrescina	1045	8	80	0	80
Ac. Aspartico	5960	9	Putrescina	1045	9	83	0	83
Ac. Aspartico	5960	9	Putrescina	1045	10	82	0	82
Ac. Aspartico	5960	9	Putrescina	1045	11	75	0	75
Ac. Aspartico	5960	9	Putrescina	1045	12	78	0	78
Ac. Aspartico	5960	9	Putrescina	1045	13	77	0	77
Ac. Aspartico	5960	11	Putrescina	1045	1	74	0	74
Ac. Aspartico	5960	11	Putrescina	1045	3	76	0	76
Ac. Aspartico	5960	11	Putrescina	1045	5	79	0	79
Ac. Aspartico	5960	11	Putrescina	1045	7	79	0	79
Ac. Aspartico	5960	11	Putrescina	1045	8	75	10	85
Ac. Aspartico	5960	11	Putrescina	1045	9	72	10	82
Ac. Aspartico	5960	11	Putrescina	1045	10	74	0	74
Ac. Aspartico	5960	11	Putrescina	1045	11	73	0	73
Ac. Aspartico	5960	11	Putrescina	1045	12	78	0	78
Ac. Aspartico	5960	11	Putrescina	1045	13	83	15	98
Ac. Aspartico	5960	12	Putrescina	1045	1	76	0	76
Ac. Aspartico	5960	12	Putrescina	1045	3	75	0	75
Ac. Aspartico	5960	12	Putrescina	1045	5	79	0	79
Ac. Aspartico	5960	12	Putrescina	1045	7	77	0	77
Ac. Aspartico	5960	12	Putrescina	1045	8	76	0	76
Ac. Aspartico	5960	12	Putrescina	1045	9	75	0	75
Ac. Aspartico	5960	12	Putrescina	1045	10	78	0	78
Ac. Aspartico	5960	12	Putrescina	1045	11	80	0	80
Ac. Aspartico	5960	12	Putrescina	1045	12	78	0	78
Ac. Aspartico	5960	12	Putrescina	1045	13	75	0	75
Ac. Aspartico	5960	1	Termoespermina	194365	1	37	0	37
Ac. Aspartico	5960	1	Termoespermina	194365	19	50	2	52
Ac. Aspartico	5960	1	Termoespermina	194365	41	51	4	55
Ac. Aspartico	5960	1	Termoespermina	194365	45	48	0	48
Ac. Aspartico	5960	1	Termoespermina	194365	52	48	8	56
Ac. Aspartico	5960	1	Termoespermina	194365	62	49	0	49
Ac. Aspartico	5960	1	Termoespermina	194365	63	42	1	43
Ac. Aspartico	5960	1	Termoespermina	194365	71	50	0	50
Ac. Aspartico	5960	1	Termoespermina	194365	73	49	0	49
Ac. Aspartico	5960	1	Termoespermina	194365	75	48	0	48
Ac. Aspartico	5960	2	Termoespermina	194365	1	40	0	40
Ac. Aspartico	5960	2	Termoespermina	194365	19	47	8	55
Ac. Aspartico	5960	2	Termoespermina	194365	41	50	0	50
Ac. Aspartico	5960	2	Termoespermina	194365	45	49	0	49
Ac. Aspartico	5960	2	Termoespermina	194365	52	47	6	53
Ac. Aspartico	5960	2	Termoespermina	194365	62	49	0	49
Ac. Aspartico	5960	2	Termoespermina	194365	63	43	0	43
Ac. Aspartico	5960	2	Termoespermina	194365	71	51	1	52
Ac. Aspartico	5960	2	Termoespermina	194365	73	52	2	54
Ac. Aspartico	5960	2	Termoespermina	194365	75	47	0	47
Ac. Aspartico	5960	3	Termoespermina	194365	1	45	0	45
Ac. Aspartico	5960	3	Termoespermina	194365	19	55	1	56
Ac. Aspartico	5960	3	Termoespermina	194365	41	53	0	53
Ac. Aspartico	5960	3	Termoespermina	194365	45	49	1	50
Ac. Aspartico	5960	3	Termoespermina	194365	52	53	0	53
Ac. Aspartico	5960	3	Termoespermina	194365	62	51	0	51
Ac. Aspartico	5960	3	Termoespermina	194365	63	47	0	47
Ac. Aspartico	5960	3	Termoespermina	194365	71	56	1	57
Ac. Aspartico	5960	3	Termoespermina	194365	73	60	5	65
Ac. Aspartico	5960	3	Termoespermina	194365	75	52	3	55
Ac. Aspartico	5960	4	Termoespermina	194365	1	38	0	38
Ac. Aspartico	5960	4	Termoespermina	194365	19	49	0	49
Ac. Aspartico	5960	4	Termoespermina	194365	41	52	0	52
Ac. Aspartico	5960	4	Termoespermina	194365	45	49	0	49
Ac. Aspartico	5960	4	Termoespermina	194365	52	45	9	54
Ac. Aspartico	5960	4	Termoespermina	194365	62	44	0	44
Ac. Aspartico	5960	4	Termoespermina	194365	63	39	0	39
Ac. Aspartico	5960	4	Termoespermina	194365	71	54	0	54
Ac. Aspartico	5960	4	Termoespermina	194365	73	54	3	57
Ac. Aspartico	5960	4	Termoespermina	194365	75	48	0	48
Ac. Aspartico	5960	5	Termoespermina	194365	1	36	0	36
Ac. Aspartico	5960	5	Termoespermina	194365	19	51	0	51
Ac. Aspartico	5960	5	Termoespermina	194365	41	51	0	51
Ac. Aspartico	5960	5	Termoespermina	194365	45	47	0	47
Ac. Aspartico	5960	5	Termoespermina	194365	52	48	0	48
Ac. Aspartico	5960	5	Termoespermina	194365	62	44	0	44
Ac. Aspartico	5960	5	Termoespermina	194365	63	45	0	45
Ac. Aspartico	5960	5	Termoespermina	194365	71	55	0	55
Ac. Aspartico	5960	5	Termoespermina	194365	73	56	2	58
Ac. Aspartico	5960	5	Termoespermina	194365	75	44	0	44
Ac. Aspartico	5960	7	Termoespermina	194365	1	46	0	46
Ac. Aspartico	5960	7	Termoespermina	194365	19	50	0	50
Ac. Aspartico	5960	7	Termoespermina	194365	41	53	0	53
Ac. Aspartico	5960	7	Termoespermina	194365	45	50	0	50
Ac. Aspartico	5960	7	Termoespermina	194365	52	53	0	53
Ac. Aspartico	5960	7	Termoespermina	194365	62	52	0	52
Ac. Aspartico	5960	7	Termoespermina	194365	63	52	0	52
Ac. Aspartico	5960	7	Termoespermina	194365	71	52	0	52
Ac. Aspartico	5960	7	Termoespermina	194365	73	54	0	54
Ac. Aspartico	5960	7	Termoespermina	194365	75	50	6	56
Ac. Aspartico	5960	8	Termoespermina	194365	1	45	0	45
Ac. Aspartico	5960	8	Termoespermina	194365	19	60	4	64
Ac. Aspartico	5960	8	Termoespermina	194365	41	59	5	64
Ac. Aspartico	5960	8	Termoespermina	194365	45	48	0	48
Ac. Aspartico	5960	8	Termoespermina	194365	52	54	0	54
Ac. Aspartico	5960	8	Termoespermina	194365	62	51	0	51
Ac. Aspartico	5960	8	Termoespermina	194365	63	50	0	50
Ac. Aspartico	5960	8	Termoespermina	194365	71	57	1	58
Ac. Aspartico	5960	8	Termoespermina	194365	73	55	6	61
Ac. Aspartico	5960	8	Termoespermina	194365	75	48	0	48
Ac. Aspartico	5960	9	Termoespermina	194365	1	45	0	45
Ac. Aspartico	5960	9	Termoespermina	194365	19	57	3	60
Ac. Aspartico	5960	9	Termoespermina	194365	41	56	4	60
Ac. Aspartico	5960	9	Termoespermina	194365	45	50	0	50
Ac. Aspartico	5960	9	Termoespermina	194365	52	55	0	55
Ac. Aspartico	5960	9	Termoespermina	194365	62	54	0	54
Ac. Aspartico	5960	9	Termoespermina	194365	63	48	0	48
Ac. Aspartico	5960	9	Termoespermina	194365	71	52	0	52
Ac. Aspartico	5960	9	Termoespermina	194365	73	52	4	56
Ac. Aspartico	5960	9	Termoespermina	194365	75	45	0	45
Ac. Aspartico	5960	11	Termoespermina	194365	1	43	0	43
Ac. Aspartico	5960	11	Termoespermina	194365	19	55	0	55
Ac. Aspartico	5960	11	Termoespermina	194365	41	56	0	56
Ac. Aspartico	5960	11	Termoespermina	194365	45	49	0	49
Ac. Aspartico	5960	11	Termoespermina	194365	52	50	8	58
Ac. Aspartico	5960	11	Termoespermina	194365	62	46	0	46
Ac. Aspartico	5960	11	Termoespermina	194365	63	43	0	43
Ac. Aspartico	5960	11	Termoespermina	194365	71	59	0	59
[truncated: 1,046,576+ more rows]

## Sheet: Phys. Parameters (Non-ionized)
No	Nombre	Canonical SMILES	Isomeric SMILES	Peso molecular	LogP	TPSA	Ac. H	Don. H	Csp3	Rot
1	L-Aspartic acid	C(C(C(=O)O)N)C(=O)O	C([C@@H](C(=O)O)N)C(=O)O	133.1	-2.04	100.62	5	3	0.5	3
2	Fumaric acid	C(=CC(=O)O)C(=O)O	C(=C/C(=O)O)\C(=O)O	116.07	-0.35	74.6	4	2	0	2
3	L-Argininosuccinic acid	C(CC(C(=O)O)N)CN=C(N)NC(CC(=O)O)C(=O)O	C(C[C@@H](C(=O)O)N)CN=C(N)N[C@@H](CC(=O)O)C(=O)O	290.27	-2.95	188.33	8	6	0.6	10
5	Agmatine	C(CCN=C(N)N)CN	NA	130.19	-0.66	90.42	2	3	0.8	4
6	L-Arginine	C(CC(C(=O)O)N)CN=C(N)N	C(C[C@@H](C(=O)O)N)CN=C(N)N	174.2	-2.04	127.72	4	4	0.67	5
7	Buformin	CCCCN=C(N)N=C(N)N	NA	157.22	-0.15	102.78	2	3	0.67	4
8	Cadaverine	C(CCN)CCN	NA	102.18	0.2	52.04	2	2	1	4
11	Carbamoyl phosphate	C(=O)(N)OP(=O)(O)O	NA	141.02	-1.2	119.66	5	3	0	2
12	L-Citrulline	C(CC(C(=O)O)N)CNC(=O)N	C(C[C@@H](C(=O)O)N)CNC(=O)N	175.19	-1.83	118.44	4	4	0.67	6
13	Creatine	CN(CC(=O)O)C(=N)N	NA	131.13	-0.97	90.41	3	3	0.5	3
14	ADMA	CN(C)C(=NCCCC(C(=O)O)N)N	CN(C)C(=NCCC[C@@H](C(=O)O)N)N	202.25	-1.41	104.94	4	3	0.75	6
15	SDMA	CNC(=NC)NCCCC(C(=O)O)N	CNC(=NC)NCCC[C@@H](C(=O)O)N	202.25	-1.34	99.74	4	4	0.75	7
16	Spermidine	C(CCNCCCN)CN	NA	145.25	0.12	64.07	3	3	1	7
17	Spermine	C(CCNCCCN)CNCCCN	NA	202.34	0.33	76.1	4	4	1	11
18	Phenformin	C1=CC=C(C=C1)CCN=C(N)N=C(N)N	NA	205.26	0.48	102.78	2	3	0.2	4
19	Guanidinoacetic acid	C(C(=O)O)N=C(N)N	NA	117.11	-1.26	101.7	3	3	0.33	2
20	L-Ornithine	C(CC(C(=O)O)N)CN	C(C[C@@H](C(=O)O)N)CN	132.16	-1.79	89.34	4	3	0.8	4
21	Metformin	CN(C)C(=N)N=C(N)N	NA	129.16	-0.89	91.49	2	3	0.5	2
22	Putrescine	C(CCN)CN	NA	88.15	-0.1	52.04	2	2	1	3
24	Urea	C(=O)(N)N	NA	60.06	-0.99	69.11	1	2	0	0

## Sheet: Phys. Parameters (Ionized)
Nombre	Canonical SMILES	Isomeric SMILES	Peso molecular	LogP	TPSA	Ac. H	Don. H	Csp3	Rot
L-Aspartate		[NH3+][C@@H](CC([O-])=O)C([O-])=O	132.09	-3.03	107.9	4	1	0.5	3
Fumarate	C(=CC(=O)[O-])C(=O)[O-]	C(=C/C(=O)[O-])\C(=O)[O-]	114.06	-0.88	80.26	4	0	0	2
L-Argininosuccinate	-	N\C(N[C@@H](CC([O-])=O)C([O-])=O)=N/CCC[C@H]([NH3+])C([O-])=O	288.26	-4.16	198.44	7	3	0.6	10
Agmatine	-	NC(=[NH2+])NCCCC[NH3+]	132.21	-1.81	91.28	0	4	0.8	5
L-Arginine	-	NC(=[NH2+])NCCC[C@H]([NH3+])C([O-])=O	175.21	-3.14	131.41	2	4	0.67	6
Buformin	-	CCCCN\C(N)=N\C(N)=[NH2+]	158.22	-0.31	102.02	1	4	0.67	5
Cadaverine	-	[NH3+]CCCCC[NH3+]	104.19	-1.56	55.28	0	2	1	4
Carbamoyl phosphate	-	NC(=O)OP([O-])([O-])=O	139	-1.04	125.32	5	1	0	2
L-Citrulline	-	NC(=O)NCCC[C@H]([NH3+])C([O-])=O	175.19	-2.53	122.89	3	3	0.67	6
Creatine	-	CN(CC([O-])=O)C(N)=[NH2+]	131.13	-1.6	94.98	2	2	0.5	3
ADMA	-	CN(C)C(=[NH2+])NCCC[C@H]([NH3+])C([O-])=O	203.26	-2.52	108.63	2	3	0.75	7
SDMA	-	CNC(NCCC[C@H]([NH3+])C([O-])=O)=[NH+]C	203.26	-2.45	105.8	2	4	0.75	7
Spermidine	-	[NH3+]CCCC[NH2+]CCC[NH3+]	148.27	-2.58	71.89	0	3	1	7
Spermine	-	[NH3+]CCC[NH2+]CCCC[NH2+]CCC[NH3+]	206.37	-3.31	88.5	0	4	1	11
Phenformin	-	NC(=[NH2+])\N=C(/N)NCCC1=CC=CC=C1	206.27	0.14	102.02	1	4	0.2	5
Guanidinoacetate	-	NC(=[NH2+])NCC([O-])=O	117.11	-2.3	103.77	2	3	0.33	3
L-Ornithine	-	[NH3+]CCC[C@H]([NH3+])C([O-])=O	133.17	-3.32	95.41	2	2	0.8	4
Metformin	-	CN(C)C(\N)=N\C(N)=[NH2+]	130.17	-1.2	93.23	1	3	0.5	2
Putrescine	-	[NH3+]CCCC[NH3+]	90.17	-1.86	55.28	0	2	1	3
Urea	-	C(=O)(N)N	60.06	-0.99	69.11	1	2	0	0

## Sheet: Dianas predichas (Ionized)
Name	Isomeric SMILES	Some predicted targets
Fumarate	C(=C/C(=O)[O-])\C(=O)[O-]	Carbonic anhydrase I
		Carbonic anhydrase II
		Carbonic anhydrase XII
		Carbonic anhydrase IX
L-Aspartate	[NH3+][C@@H](CC([O-])=O)C([O-])=O	NA
L-Argininosuccinate	N\C(N[C@@H](CC([O-])=O)C([O-])=O)=N/CCC[C@H]([NH3+])C([O-])=O	Endothelial nitric oxide synthase
		Inducible nitric oxide synthase
		Neural nitric oxide synthase
		Carbonic anhydrase I
		Carbonic anhydrase IV
		Carbonic anhydrase II
Agmatine	NC(=[NH2+])NCCCC[NH3+]	Trombina*
		Receptor opioide sigma*
		Endothelial nitric oxide synthase
		Inducible nitric oxide synthase
		Neural nitric oxide synthase
		Polyamine oxidase
		Carbonic anhydrase VII
		Carbonic anhydrase III
		Carbonic anhydrase XII
		Carbonic anhydrase XIV
		Carbonic anhydrase IX
		Carbonic anhydrase IV
		Carbonic anhydrase VI
		Carbonic anhydrase V
		Carbonic anhydrase XIII
		Carbonic anhydrase I
		Ornithine decarboxylase
		Diamine oxidase
L-Arginine	NC(=[NH2+])NCCC[C@H]([NH3+])C([O-])=O	Endothelial nitric oxide synthase
		Inducible nitric oxide synthase
		Neural nitric oxide synthase
		Arginase I
		Dimethylarginine dimethylaminohydrolase I
		Carbonic anhydrase II
		Carbonic anhydrase I
		Carbonic anhydrase XII
		Carbonic anhydrase IX
Buformin	CCCCN\C(N)=N\C(N)=[NH2+]	Carbonic anhydrase II
		Carbonic anhydrase I
		Carbonic anhydrase XII
		Carbonic anhydrase IX
		Neural nitric oxide synthase
		Endothelial nitric oxide synthase
		Carbonic anhydrase III
		Carbonic anhydrase VI
		Carbonic anhydrase VII
		Carbonic anhydrase XIV
		Carbonic anhydrase V
		Carbonic anhydrase IV
		Carbonic anhydrase XIII
		Inducible nitric oxide synthase
Cadaverine	[NH3+]CCCCC[NH3+]	Anhidrasa carbonica VII**
		Anhidrasa carbonica III**
		Anhidrasa carbonica XII**
		Anhidrasa carbonica XIV**
		Anhidrasa carbonica IX**
		Anhidrasa carbonica IV**
		Anhidrasa carbonica V**
		Anhidrasa carbonica XIII**
		Anhidrasa carbonica I**
		Anhidrasa carbonica II**
		Ornitina descarboxilasa
		Óxido nítrico sintasa inducible*
		Óxido nítrico sintasa cerebral*
		Poliamina oxidasa**
Carbamoyl phosphate	NC(=O)OP([O-])([O-])=O	Carbonic anhydrase I
		Carbonic anhydrase IV
L-Citrulline	NC(=O)NCCC[C@H]([NH3+])C([O-])=O	Endothelial nitric oxide synthase
		Inducible nitric oxide synthase
		Neural nitric oxide synthase
		Carbonic anhydrase II
		Protein arginine methyltransferase I
		Carbonic anhydrase IX
		Carbonic anhydrase XII
Creatine	CN(CC([O-])=O)C(N)=[NH2+]	Ornithine decarboxylase
		Carbonic anhydrase II
		Carbonic anhydrase I
		Carbonic anhydrase IX
		Carbonic anhydrase XII
		Arginase I
		Carbonic anhydrase XIV
		Endothelial nitric oxide synthase
		Inducible nitric oxide synthase
		Neural nitric oxide synthase
ADMA	CN(C)C(=[NH2+])NCCC[C@H]([NH3+])C([O-])=O	Endothelial nitric oxide synthase
		Inducible nitric oxide synthase
		Neural nitric oxide synthase
		Dimethylarginine dimethylaminohydrolase I
		Arginase I
		Carbonic anhydrase II
		Carbonic anhydrase I
SDMA	CNC(NCCC[C@H]([NH3+])C([O-])=O)=[NH+]C	Endothelial nitric oxide synthase
		Inducible nitric oxide synthase
		Neural nitric oxide synthase
		Dimethylarginine dimethylaminohydrolase I
Spermidine	[NH3+]CCCC[NH2+]CCC[NH3+]	Carbonic anhydrase I
		Carbonic anhydrase II
		Carbonic anhydrase IV
		Carbonic anhydrase V
		Carbonic anhydrase VI
		Carbonic anhydrase VII
		Carbonic anhydrase IX
		Carbonic anhydrase III
		Carbonic anhydrase XIV
		Carbonic anhydrase XIII
		Ornithine decarboxylase
		Carbonic anhydrase XII
		Neural nitric oxide synthase
Spermine	[NH3+]CCC[NH2+]CCCC[NH2+]CCC[NH3+]	Carbonic anhydrase II
		Carbonic anhydrase IV
		Carbonic anhydrase V
		Carbonic anhydrase VI
		Carbonic anhydrase VII
		Carbonic anhydrase IX
		Carbonic anhydrase XIV
		Carbonic anhydrase I
		Polyamine oxidase
		CARM1
		Carbonic anhydrase XII
		Protein arginine methyltransferase VI
Phenformin	NC(=[NH2+])\N=C(/N)NCCC1=CC=CC=C1	Endothelial nitric oxide synthase
		Inducible nitric oxide synthase
		Neural nitric oxide synthase
Guanidinoacetate	NC(=[NH2+])NCC([O-])=O	Carbonic anhydrase II
		Carbonic anhydrase I
		Carbonic anhydrase IX
		Carbonic anhydrase XII
		Endothelial nitric oxide synthase
		Inducible nitric oxide synthase
		Neural nitric oxide synthase
L-Ornithine	[NH3+]CCC[C@H]([NH3+])C([O-])=O	Ornithine decarboxylase
		Endothelial nitric oxide synthase
		Inducible nitric oxide synthase
		Neural nitric oxide synthase
		Polyamine oxidase
		Carbonic anhydrase IX
		Carbonic anhydrase XII
		Carbonic anhydrase II
		Arginase I
Metformin	CN(C)C(\N)=N\C(N)=[NH2+]	Endothelial nitric oxide synthase
		Inducible nitric oxide synthase
		Neural nitric oxide synthase
		Carbonic anhydrase II
		Carbonic anhydrase I
		Carbonic anhydrase IX
Putrescine	[NH3+]CCCC[NH3+]	Carbonic anhydrase VII
		Carbonic anhydrase III
		Carbonic anhydrase XII
		Carbonic anhydrase XIV
		Carbonic anhydrase IX
		Carbonic anhydrase IV
		Carbonic anhydrase V
		Carbonic anhydrase XIII
		Carbonic anhydrase I
		Carbonic anhydrase II
		Ornithine decarboxylase
		Inducible nitric oxide synthase
		Polyamine oxidase
Urea	C(=O)(N)N	N/A
